# Supplementary material
Source: PubMed Central journal article supplement (PMC2791795)

# Synthesis of Structurally Simplified Analogues of Pancratistatin:

## Truncation of the Cyclitol Ring

### Supplemental Information

Madhuri Manpadi, Artem S. Kireev, Igor V. Magedov,\* Jeff Altig, Paul Tongwa,  
Mikhail Yu. Antipin, Antonio Evidente, Willem A. L. van Otterlo,  
and Alexander Kornienko\*

*Department of Chemistry, New Mexico Institute of Mining and Technology, Socorro, New Mexico 87801, USA, Department of Natural Sciences, New Mexico Highlands University, Las Vegas, New Mexico 87701, USA, Institute of Organoelement Compounds, Russian Academy of Sciences, Moscow, Russia, Dipartimento di Scienze, del Suolo, della Pianta, dell'Ambiente e delle Produzioni Animali,*

*Università di Napoli Federico II, Via Università 100, 80055 Portici, Italy, Molecular Sciences Institute, Molecular Sciences Institute, School of Chemistry, University of the Witwatersrand, PO Wits, 2050 Johannesburg, South Africa*

*akornien@nmt.edu*

### Table of Contents

|                                                                         |          |
|-------------------------------------------------------------------------|----------|
| General Experimental Details                                            | S 2      |
| X-ray Data                                                              | S2 - S9  |
| DFT Optimization                                                        | S9 - S10 |
| <sup>1</sup> H NMR and <sup>13</sup> C NMR spectra of all new compounds | S11- S51 |

**General Experimental Details:** Unless otherwise noted all commercially obtained reagents were used without purification. THF was distilled from sodium-benzophenone ketyl prior to use. Dichloromethane and methanol were distilled from calcium hydride. Reactions were carried out under a nitrogen atmosphere in oven-dried glassware using standard syringe, cannula and septa techniques. Reactions were monitored by TLC (Silica Gel 60 F254, 250  $\mu\text{m}$ ) and visualized with UV light and ceric ammonium molybdate solution. Flash chromatography was performed on silica gel (32-63  $\mu\text{m}$ , 60  $\text{\AA}$  pore size).  $^1\text{H}$  and  $^{13}\text{C}$  NMR spectra were recorded on 300 MHz spectrometer.

### **X-ray structure determination.**

Details of the crystal data, data collection and structure refinement parameters for compound **23** are presented in Table 1. Single crystal X-ray diffraction experiment was carried out with a diffractometer, with CCD area detector at 250K. Semiempirical method SADABS1 was applied for absorption correction. The structure was solved by direct methods and refined by the full-matrix least-squares technique against  $F^2$  with the anisotropic temperature parameters for all non-hydrogen atoms. Data reduction and further calculations were performed using SAINT+2 and SHELXTL NT3 program packages.

### **References**

1. Sheldrick G.M. SADABS v.2.03, Bruker/Siemens Area Detector Absorption Correction Program, (2003) Bruker AXS, Madison, Wisconsin, USA.
2. SAINTP+ for NT. Data Reduction and Correction Program v. 6.2, (2001) Bruker AXS, Madison, Wisconsin, USA.
3. Sheldrick G.M. SHELXTL NT v. 6.12, Structure Determination Software Suite, (2001) Bruker AXS, Madison, Wisconsin, USA.

**Table 1.** Crystal data and structure refinement for **23**.

|                     |                                                  |
|---------------------|--------------------------------------------------|
| Identification code | paul17a                                          |
| Empirical formula   | C <sub>20</sub> H <sub>23</sub> N O <sub>9</sub> |
| Formula weight      | 421.39                                           |
| Temperature         | 273(2) K                                         |
| Wavelength          | 1.54178 $\text{\AA}$                             |

|                                   |                                             |                               |
|-----------------------------------|---------------------------------------------|-------------------------------|
| Crystal system                    | Monoclinic                                  |                               |
| Space group                       | P2(1)                                       |                               |
| Unit cell dimensions              | a = 10.0278(2) Å                            | $\alpha = 90^\circ$ .         |
|                                   | b = 7.7271(2) Å                             | $\beta = 92.6880(10)^\circ$ . |
|                                   | c = 12.6670(2) Å                            | $\gamma = 90^\circ$ .         |
| Volume                            | 980.43(4) Å <sup>3</sup>                    |                               |
| Z                                 | 2                                           |                               |
| Density (calculated)              | 1.427 Mg/m <sup>3</sup>                     |                               |
| Absorption coefficient            | 0.963 mm <sup>-1</sup>                      |                               |
| F(000)                            | 444                                         |                               |
| Crystal size                      | 0.40 x 0.19 x 0.14 mm <sup>3</sup>          |                               |
| Theta range for data collection   | 3.49 to 68.92°.                             |                               |
| Index ranges                      | -11<=h<=12, -9<=k<=8, -14<=l<=15            |                               |
| Reflections collected             | 8357                                        |                               |
| Independent reflections           | 3188 [R(int) = 0.0225]                      |                               |
| Completeness to theta = 68.92°    | 99.0 %                                      |                               |
| Absorption correction             | Numerical                                   |                               |
| Max. and min. transmission        | 0.8769 and 0.6993                           |                               |
| Refinement method                 | Full-matrix least-squares on F <sup>2</sup> |                               |
| Data / restraints / parameters    | 3188 / 1 / 271                              |                               |
| Goodness-of-fit on F <sup>2</sup> | 1.036                                       |                               |
| Final R indices [I>2sigma(I)]     | R1 = 0.0404, wR2 = 0.1021                   |                               |
| R indices (all data)              | R1 = 0.0475, wR2 = 0.1077                   |                               |
| Absolute structure parameter      | 0.3(2)                                      |                               |
| Largest diff. peak and hole       | 0.172 and -0.177 e.Å <sup>-3</sup>          |                               |

**Table 2.** Atomic coordinates ( x 10<sup>4</sup>) and equivalent isotropic displacement parameters (Å<sup>2</sup>x 10<sup>3</sup>) for **23**. U(eq) is defined as one third of the trace of the orthogonalized U<sup>ij</sup> tensor.

|      | x        | y        | z        | U(eq)  |
|------|----------|----------|----------|--------|
| O(1) | -756(4)  | -5172(4) | -8921(2) | 118(1) |
| N(1) | -3857(2) | -4995(3) | -7817(2) | 57(1)  |
| C(1) | -2921(2) | -2224(3) | -7341(2) | 47(1)  |
| O(2) | 140(3)   | 498(3)   | -5427(2) | 88(1)  |
| C(2) | -3911(2) | -3178(4) | -8071(2) | 51(1)  |

|       |          |          |           |       |
|-------|----------|----------|-----------|-------|
| O(3)  | -603(2)  | -43(2)   | -7083(1)  | 53(1) |
| C(3)  | -3677(2) | -5626(4) | -6835(2)  | 57(1) |
| O(4)  | -1329(2) | -2464(2) | -8678(1)  | 52(1) |
| C(4)  | -3472(2) | -4336(3) | -5968(2)  | 53(1) |
| O(5)  | -6175(2) | -3309(3) | -8744(2)  | 65(1) |
| C(5)  | -3592(3) | -4870(4) | -4915(2)  | 62(1) |
| O(6)  | -5616(3) | -1559(4) | -10024(2) | 96(1) |
| C(6)  | -3438(3) | -3655(5) | -4158(2)  | 64(1) |
| O(7)  | -3691(2) | -7172(3) | -6657(2)  | 75(1) |
| C(7)  | -3205(4) | -2164(6) | -2649(2)  | 87(1) |
| O(8)  | -3464(3) | -3828(4) | -3077(2)  | 88(1) |
| C(8)  | -3227(3) | -1960(4) | -4405(2)  | 59(1) |
| O(9)  | -3171(2) | -988(4)  | -3498(2)  | 78(1) |
| C(9)  | -3092(2) | -1413(4) | -5415(2)  | 54(1) |
| C(10) | -3191(2) | -2661(3) | -6209(2)  | 50(1) |
| C(11) | -1509(2) | -2757(3) | -7565(2)  | 48(1) |
| C(12) | -452(2)  | -1862(3) | -6899(2)  | 51(1) |
| C(13) | 924(3)   | -2395(4) | -7155(3)  | 73(1) |
| C(14) | -255(3)  | 989(3)   | -6267(2)  | 55(1) |
| C(15) | -410(3)  | 2825(4)  | -6570(3)  | 69(1) |
| C(16) | -1020(3) | -3813(4) | -9272(2)  | 65(1) |
| C(17) | -1090(4) | -3417(6) | -10417(2) | 84(1) |
| C(18) | -5273(3) | -2461(4) | -7999(2)  | 62(1) |
| C(19) | -6250(3) | -2748(4) | -9733(2)  | 66(1) |
| C(20) | -7166(4) | -3770(5) | -10418(3) | 93(1) |

---

**Table 3.** Bond lengths [Å] and angles [°] for **23**.

---

|            |          |
|------------|----------|
| O(1)-C(16) | 1.166(4) |
| N(1)-C(3)  | 1.341(4) |
| N(1)-C(2)  | 1.440(4) |
| N(1)-HN1   | 0.8600   |
| C(1)-C(2)  | 1.515(3) |
| C(1)-C(10) | 1.510(3) |
| C(1)-C(11) | 1.514(3) |
| C(1)-H(1)  | 0.9800   |
| O(2)-C(14) | 1.181(3) |
| C(2)-C(18) | 1.481(4) |
| C(2)-H(2)  | 0.9800   |
| O(3)-C(14) | 1.339(3) |
| O(3)-C(12) | 1.432(3) |
| C(3)-O(7)  | 1.216(3) |
| C(3)-C(4)  | 1.490(4) |
| O(4)-C(16) | 1.331(3) |
| O(4)-C(11) | 1.448(3) |
| C(4)-C(10) | 1.363(4) |
| C(4)-C(5)  | 1.407(4) |
| O(5)-C(19) | 1.324(3) |
| O(5)-C(18) | 1.436(3) |
| C(5)-C(6)  | 1.346(5) |
| C(5)-H(5)  | 0.9300   |
| O(6)-C(19) | 1.185(4) |
| C(6)-O(8)  | 1.377(3) |
| C(6)-C(8)  | 1.366(5) |
| C(7)-O(8)  | 1.415(5) |
| C(7)-O(9)  | 1.410(4) |
| C(7)-H(7A) | 0.9700   |
| C(7)-H(7B) | 0.9700   |
| C(8)-O(9)  | 1.372(3) |
| C(8)-C(9)  | 1.360(4) |
| C(9)-C(10) | 1.393(4) |
| C(9)-H(9)  | 0.9300   |

|                  |            |
|------------------|------------|
| C(11)-C(12)      | 1.493(3)   |
| C(11)-H(11)      | 0.9800     |
| C(12)-C(13)      | 1.490(4)   |
| C(12)-H(12)      | 0.9800     |
| C(13)-H(13A)     | 0.9600     |
| C(13)-H(13B)     | 0.9600     |
| C(13)-H(13C)     | 0.9600     |
| C(14)-C(15)      | 1.476(4)   |
| C(15)-H(15A)     | 0.9600     |
| C(15)-H(15B)     | 0.9600     |
| C(15)-H(15C)     | 0.9600     |
| C(16)-C(17)      | 1.481(4)   |
| C(17)-H(17A)     | 0.9600     |
| C(17)-H(17B)     | 0.9600     |
| C(17)-H(17C)     | 0.9600     |
| C(18)-H(18A)     | 0.9700     |
| C(18)-H(18B)     | 0.9700     |
| C(19)-C(20)      | 1.466(4)   |
| C(20)-H(20A)     | 0.9600     |
| C(20)-H(20B)     | 0.9600     |
| C(20)-H(20C)     | 0.9600     |
| C(3)-N(1)-C(2)   | 124.3(2)   |
| C(3)-N(1)-HN1    | 117.9      |
| C(2)-N(1)-HN1    | 117.9      |
| C(2)-C(1)-C(10)  | 109.2(2)   |
| C(2)-C(1)-C(11)  | 110.18(19) |
| C(10)-C(1)-C(11) | 109.15(19) |
| C(2)-C(1)-H(1)   | 109.4      |
| C(10)-C(1)-H(1)  | 109.4      |
| C(11)-C(1)-H(1)  | 109.4      |
| N(1)-C(2)-C(18)  | 112.1(2)   |
| N(1)-C(2)-C(1)   | 108.8(2)   |
| C(18)-C(2)-C(1)  | 111.1(2)   |
| N(1)-C(2)-H(2)   | 108.3      |
| C(18)-C(2)-H(2)  | 108.3      |
| C(1)-C(2)-H(2)   | 108.3      |

|                  |            |
|------------------|------------|
| C(14)-O(3)-C(12) | 115.89(19) |
| O(7)-C(3)-N(1)   | 121.8(3)   |
| O(7)-C(3)-C(4)   | 121.6(3)   |
| N(1)-C(3)-C(4)   | 116.6(2)   |
| C(16)-O(4)-C(11) | 118.1(2)   |
| C(10)-C(4)-C(5)  | 121.2(3)   |
| C(10)-C(4)-C(3)  | 119.6(2)   |
| C(5)-C(4)-C(3)   | 119.2(2)   |
| C(19)-O(5)-C(18) | 118.6(2)   |
| C(6)-C(5)-C(4)   | 117.3(3)   |
| C(6)-C(5)-H(5)   | 121.3      |
| C(4)-C(5)-H(5)   | 121.3      |
| C(5)-C(6)-O(8)   | 129.3(3)   |
| C(5)-C(6)-C(8)   | 121.3(3)   |
| O(8)-C(6)-C(8)   | 109.4(3)   |
| O(8)-C(7)-O(9)   | 107.7(2)   |
| O(8)-C(7)-H(7A)  | 110.2      |
| O(9)-C(7)-H(7A)  | 110.2      |
| O(8)-C(7)-H(7B)  | 110.2      |
| O(9)-C(7)-H(7B)  | 110.2      |
| H(7A)-C(7)-H(7B) | 108.5      |
| C(6)-O(8)-C(7)   | 106.3(3)   |
| O(9)-C(8)-C(9)   | 128.0(3)   |
| O(9)-C(8)-C(6)   | 109.5(3)   |
| C(9)-C(8)-C(6)   | 122.5(3)   |
| C(8)-O(9)-C(7)   | 106.5(3)   |
| C(8)-C(9)-C(10)  | 117.2(3)   |
| C(8)-C(9)-H(9)   | 121.4      |
| C(10)-C(9)-H(9)  | 121.4      |
| C(4)-C(10)-C(9)  | 120.4(2)   |
| C(4)-C(10)-C(1)  | 118.2(2)   |
| C(9)-C(10)-C(1)  | 121.4(2)   |
| O(4)-C(11)-C(12) | 111.1(2)   |
| O(4)-C(11)-C(1)  | 107.47(18) |
| C(12)-C(11)-C(1) | 114.4(2)   |
| O(4)-C(11)-H(11) | 107.9      |

|                     |            |
|---------------------|------------|
| C(12)-C(11)-H(11)   | 107.9      |
| C(1)-C(11)-H(11)    | 107.9      |
| O(3)-C(12)-C(11)    | 107.22(19) |
| O(3)-C(12)-C(13)    | 109.2(2)   |
| C(11)-C(12)-C(13)   | 112.9(2)   |
| O(3)-C(12)-H(12)    | 109.2      |
| C(11)-C(12)-H(12)   | 109.2      |
| C(13)-C(12)-H(12)   | 109.2      |
| C(12)-C(13)-H(13A)  | 109.5      |
| C(12)-C(13)-H(13B)  | 109.5      |
| H(13A)-C(13)-H(13B) | 109.5      |
| C(12)-C(13)-H(13C)  | 109.5      |
| H(13A)-C(13)-H(13C) | 109.5      |
| H(13B)-C(13)-H(13C) | 109.5      |
| O(2)-C(14)-O(3)     | 124.7(3)   |
| O(2)-C(14)-C(15)    | 124.7(3)   |
| O(3)-C(14)-C(15)    | 110.6(2)   |
| C(14)-C(15)-H(15A)  | 109.5      |
| C(14)-C(15)-H(15B)  | 109.5      |
| H(15A)-C(15)-H(15B) | 109.5      |
| C(14)-C(15)-H(15C)  | 109.5      |
| H(15A)-C(15)-H(15C) | 109.5      |
| H(15B)-C(15)-H(15C) | 109.5      |
| O(1)-C(16)-O(4)     | 123.0(3)   |
| O(1)-C(16)-C(17)    | 124.1(3)   |
| O(4)-C(16)-C(17)    | 113.0(3)   |
| C(16)-C(17)-H(17A)  | 109.5      |
| C(16)-C(17)-H(17B)  | 109.5      |
| H(17A)-C(17)-H(17B) | 109.5      |
| C(16)-C(17)-H(17C)  | 109.5      |
| H(17A)-C(17)-H(17C) | 109.5      |
| H(17B)-C(17)-H(17C) | 109.5      |
| O(5)-C(18)-C(2)     | 110.1(2)   |
| O(5)-C(18)-H(18A)   | 109.6      |
| C(2)-C(18)-H(18A)   | 109.6      |
| O(5)-C(18)-H(18B)   | 109.6      |



|                     |          |
|---------------------|----------|
| C(2)-C(18)-H(18B)   | 109.6    |
| H(18A)-C(18)-H(18B) | 108.2    |
| O(6)-C(19)-O(5)     | 122.8(3) |
| O(6)-C(19)-C(20)    | 124.3(3) |
| O(5)-C(19)-C(20)    | 112.9(3) |
| C(19)-C(20)-H(20A)  | 109.5    |
| C(19)-C(20)-H(20B)  | 109.5    |
| H(20A)-C(20)-H(20B) | 109.5    |
| C(19)-C(20)-H(20C)  | 109.5    |
| H(20A)-C(20)-H(20C) | 109.5    |
| H(20B)-C(20)-H(20C) | 109.5    |

---

Symmetry transformations used to generate equivalent atoms:

### DFT Optimizations

Geometry optimizations were carried out using B3LYP method of density functional theory. B3LYP denotes a three-parameter hybrid density functional that combines Becke's exchange functional with the correlation functional by Lee, Yang, and Parr.<sup>[1-3]</sup> The basis set 6-31g\* was employed for the optimization. The crystallographic molecular structure<sup>[4]</sup> was used for the initial geometry of pancratistatin. All calculations were carried out with Gaussian03, Revision B.01.<sup>[5]</sup>

### References

- [1] A. D. Becke, *Phys. Rev.* **1988**, *A38*, 3098.
- [2] A. D. Becke, *J. Chem. Phys.* **1993**, *98*, 5648.
- [3] C. T. Lee, W. T. Yang, R. G. Parr, *Phys. Rev.* **1988**, *B37*, 785.
- [4] G. R. Pettit, Y. Meng, D. L. Herald, J. C. Knight, and J. F. Day, *J. Nat. Prod.* **2005**, *68*, 1256.
- [5] M. J. Frisch, G. W. Trucks, H. B. Schlegel, G. E. Scuseria, M. A. Robb, J. R. Cheeseman, J. A. Montgomery, Jr., T. Vreven, K. N. Kudin, J. C. Burant, J. M. Millam, S. S. Iyengar, J. Tomasi, V. Barone, B. Mennucci, M. Cossi, G. Scalmani, N. Rega, G. A. Petersson, H. Nakatsuji, M. Hada, M. Ehara, K. Toyota, R. Fukuda, J. Hasegawa, M. Ishida, T. Nakajima, Y. Honda, O. Kitao, H. Nakai, M. Klene, X. Li, J. E. Knox, H. P. Hratchian, J. B. Cross, C. Adamo, J. Jaramillo, R. Gomperts, R. E. Stratmann, O. Yazyev, A. J. Austin, R. Cammi, C. Pomelli, J.

W. Ochterski, P. Y. Ayala, K. Morokuma, G. A. Voth, P. Salvador, J. J. Dannenberg, V. G. Zakrzewski, S. Dapprich, A. D. Daniels, M. C. Strain, O. Farkas, D. K. Malick, A. D. Rabuck, K. Raghavachari, J. B. Foresman, J. V. Ortiz, Q. Cui, A. G. Baboul, S. Clifford, J. Cioslowski, B. B. Stefanov, G. Liu, A. Liashenko, P. Piskorz, I. Komaromi, R. L. Martin, D. J. Fox, T. Keith, M. A. Al-Laham, C. Y. Peng, A. Nanayakkara, M. Challacombe, P. M. W. Gill, B. Johnson, W. Chen, M. W. Wong, C. Gonzalez, and J. A. Pople, Gaussian, Inc., Pittsburgh PA, 2003.

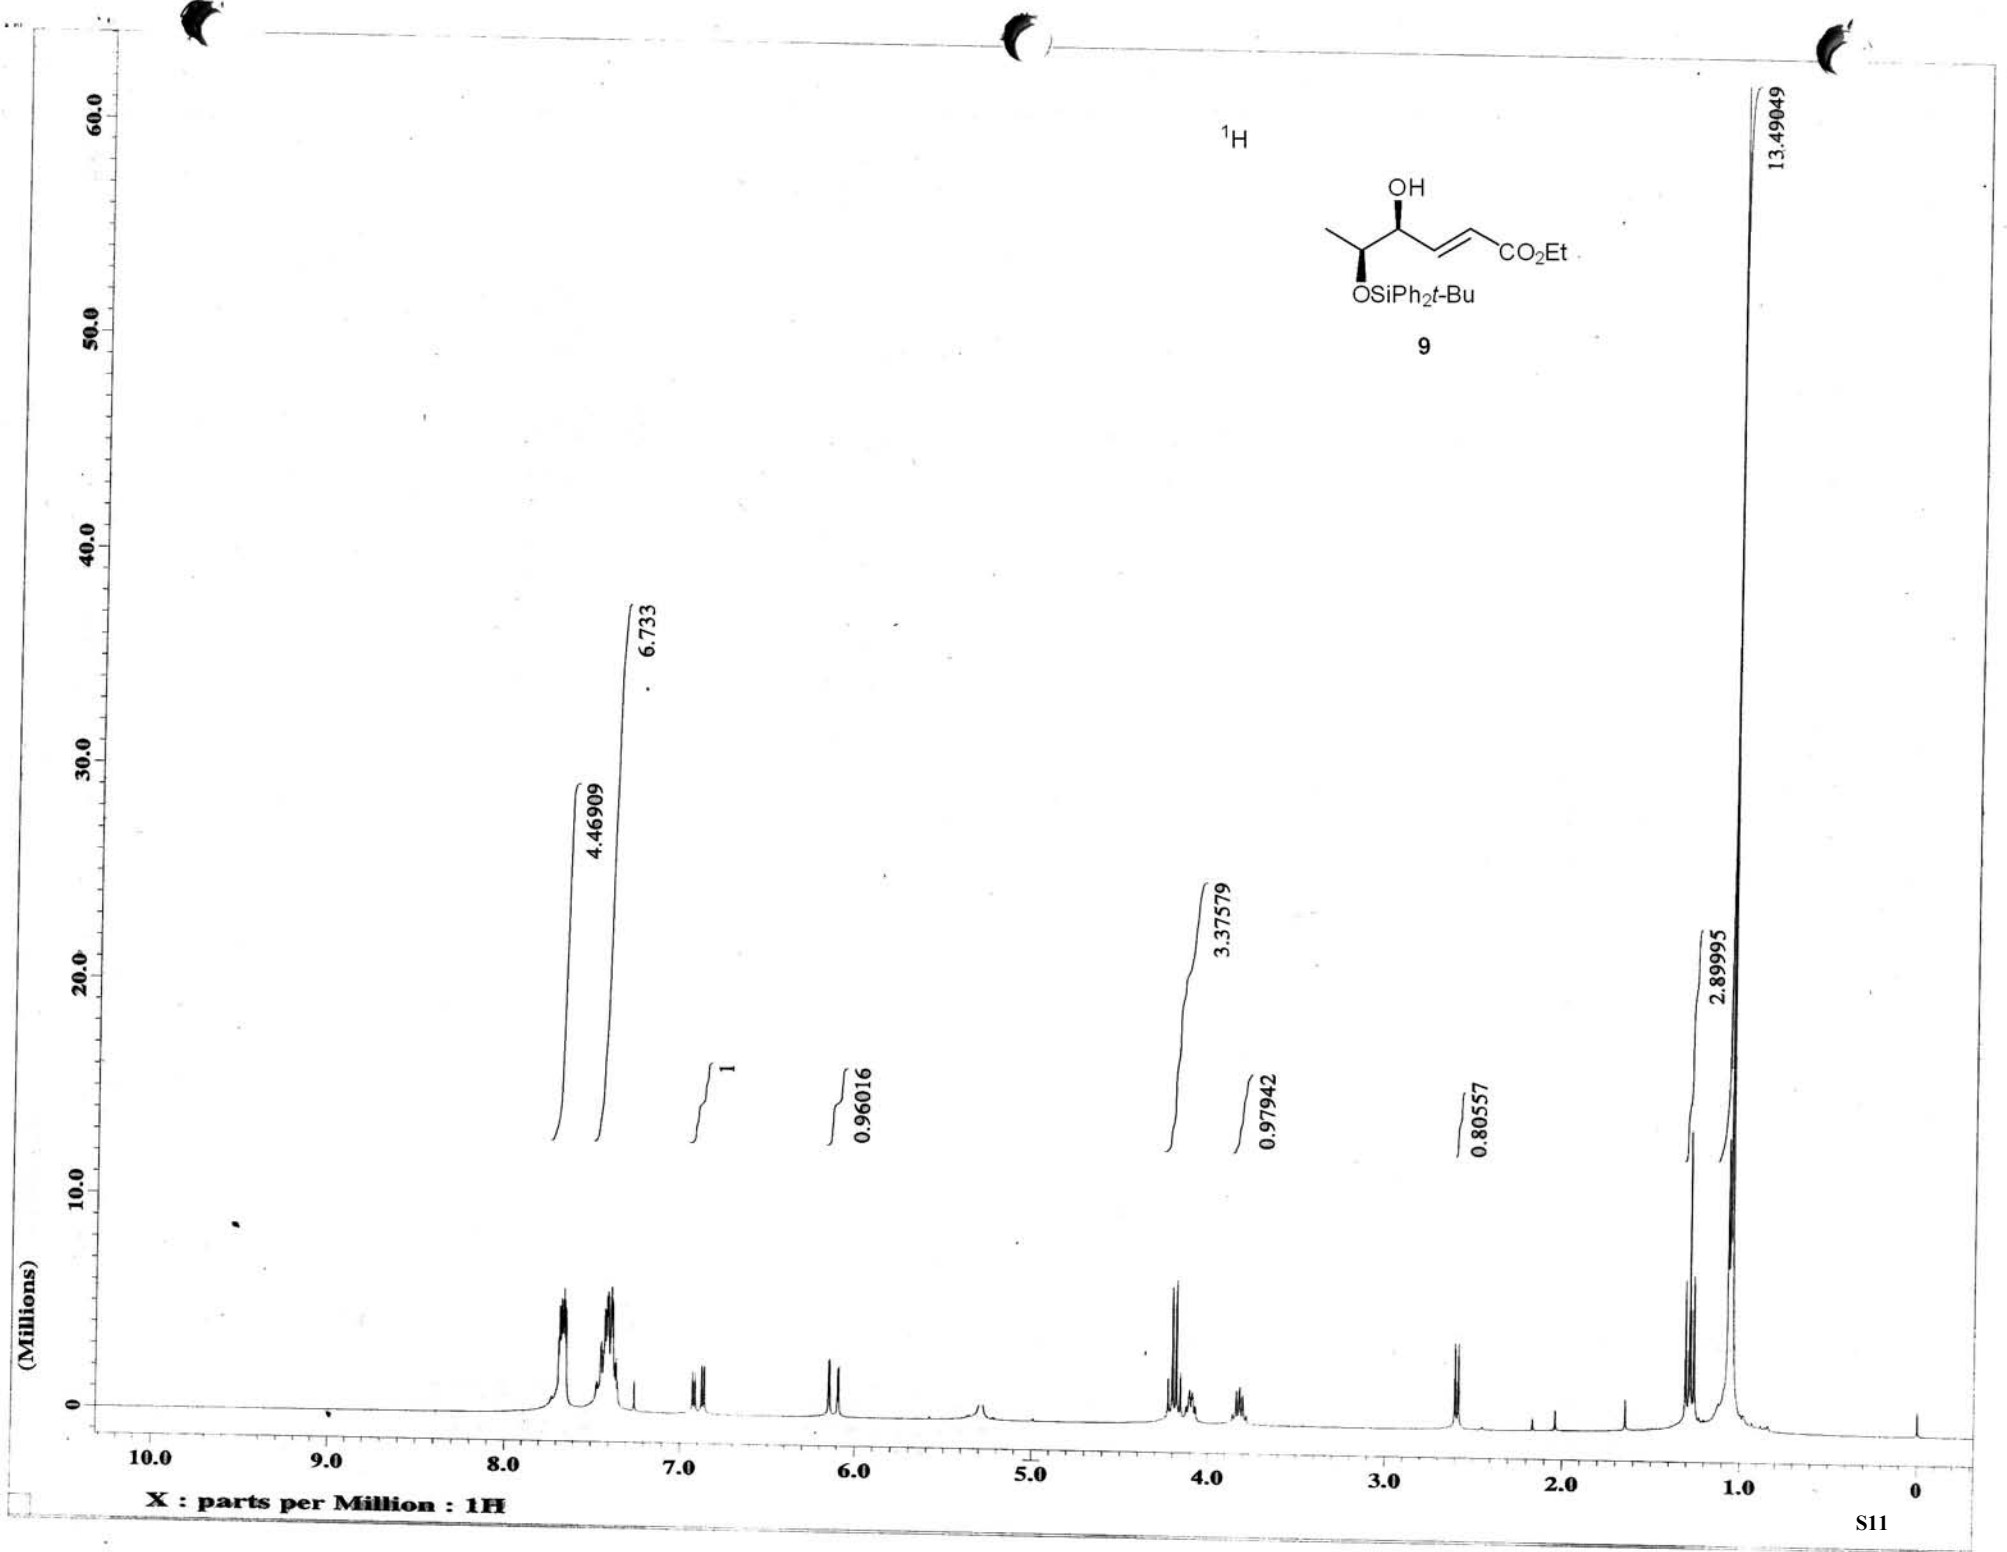

<sup>13</sup>C

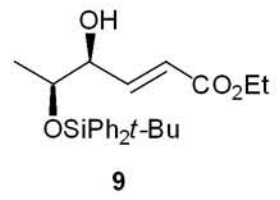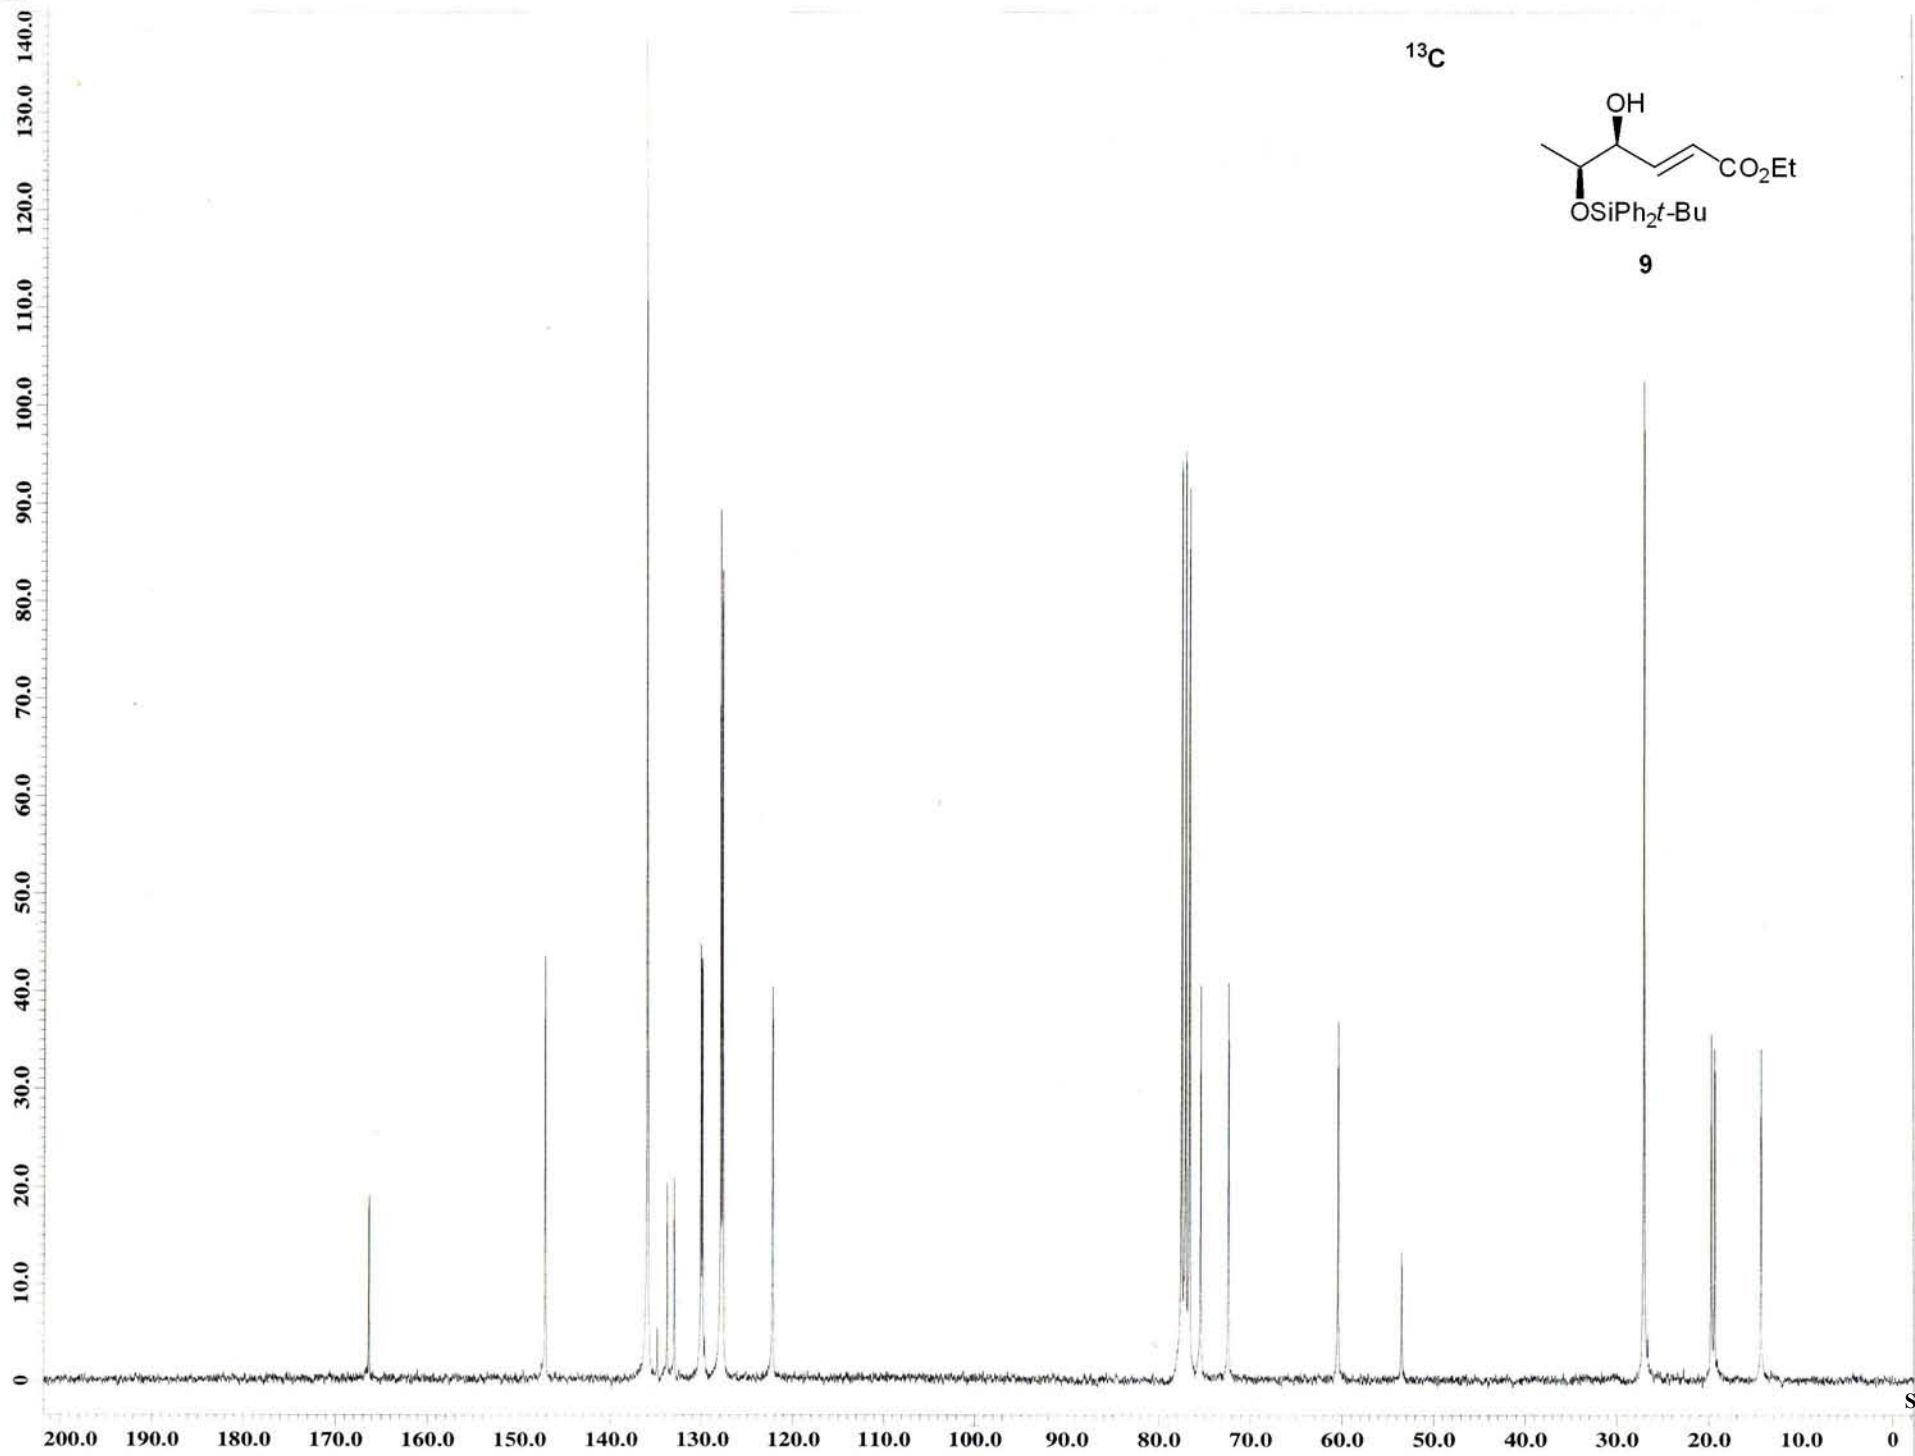

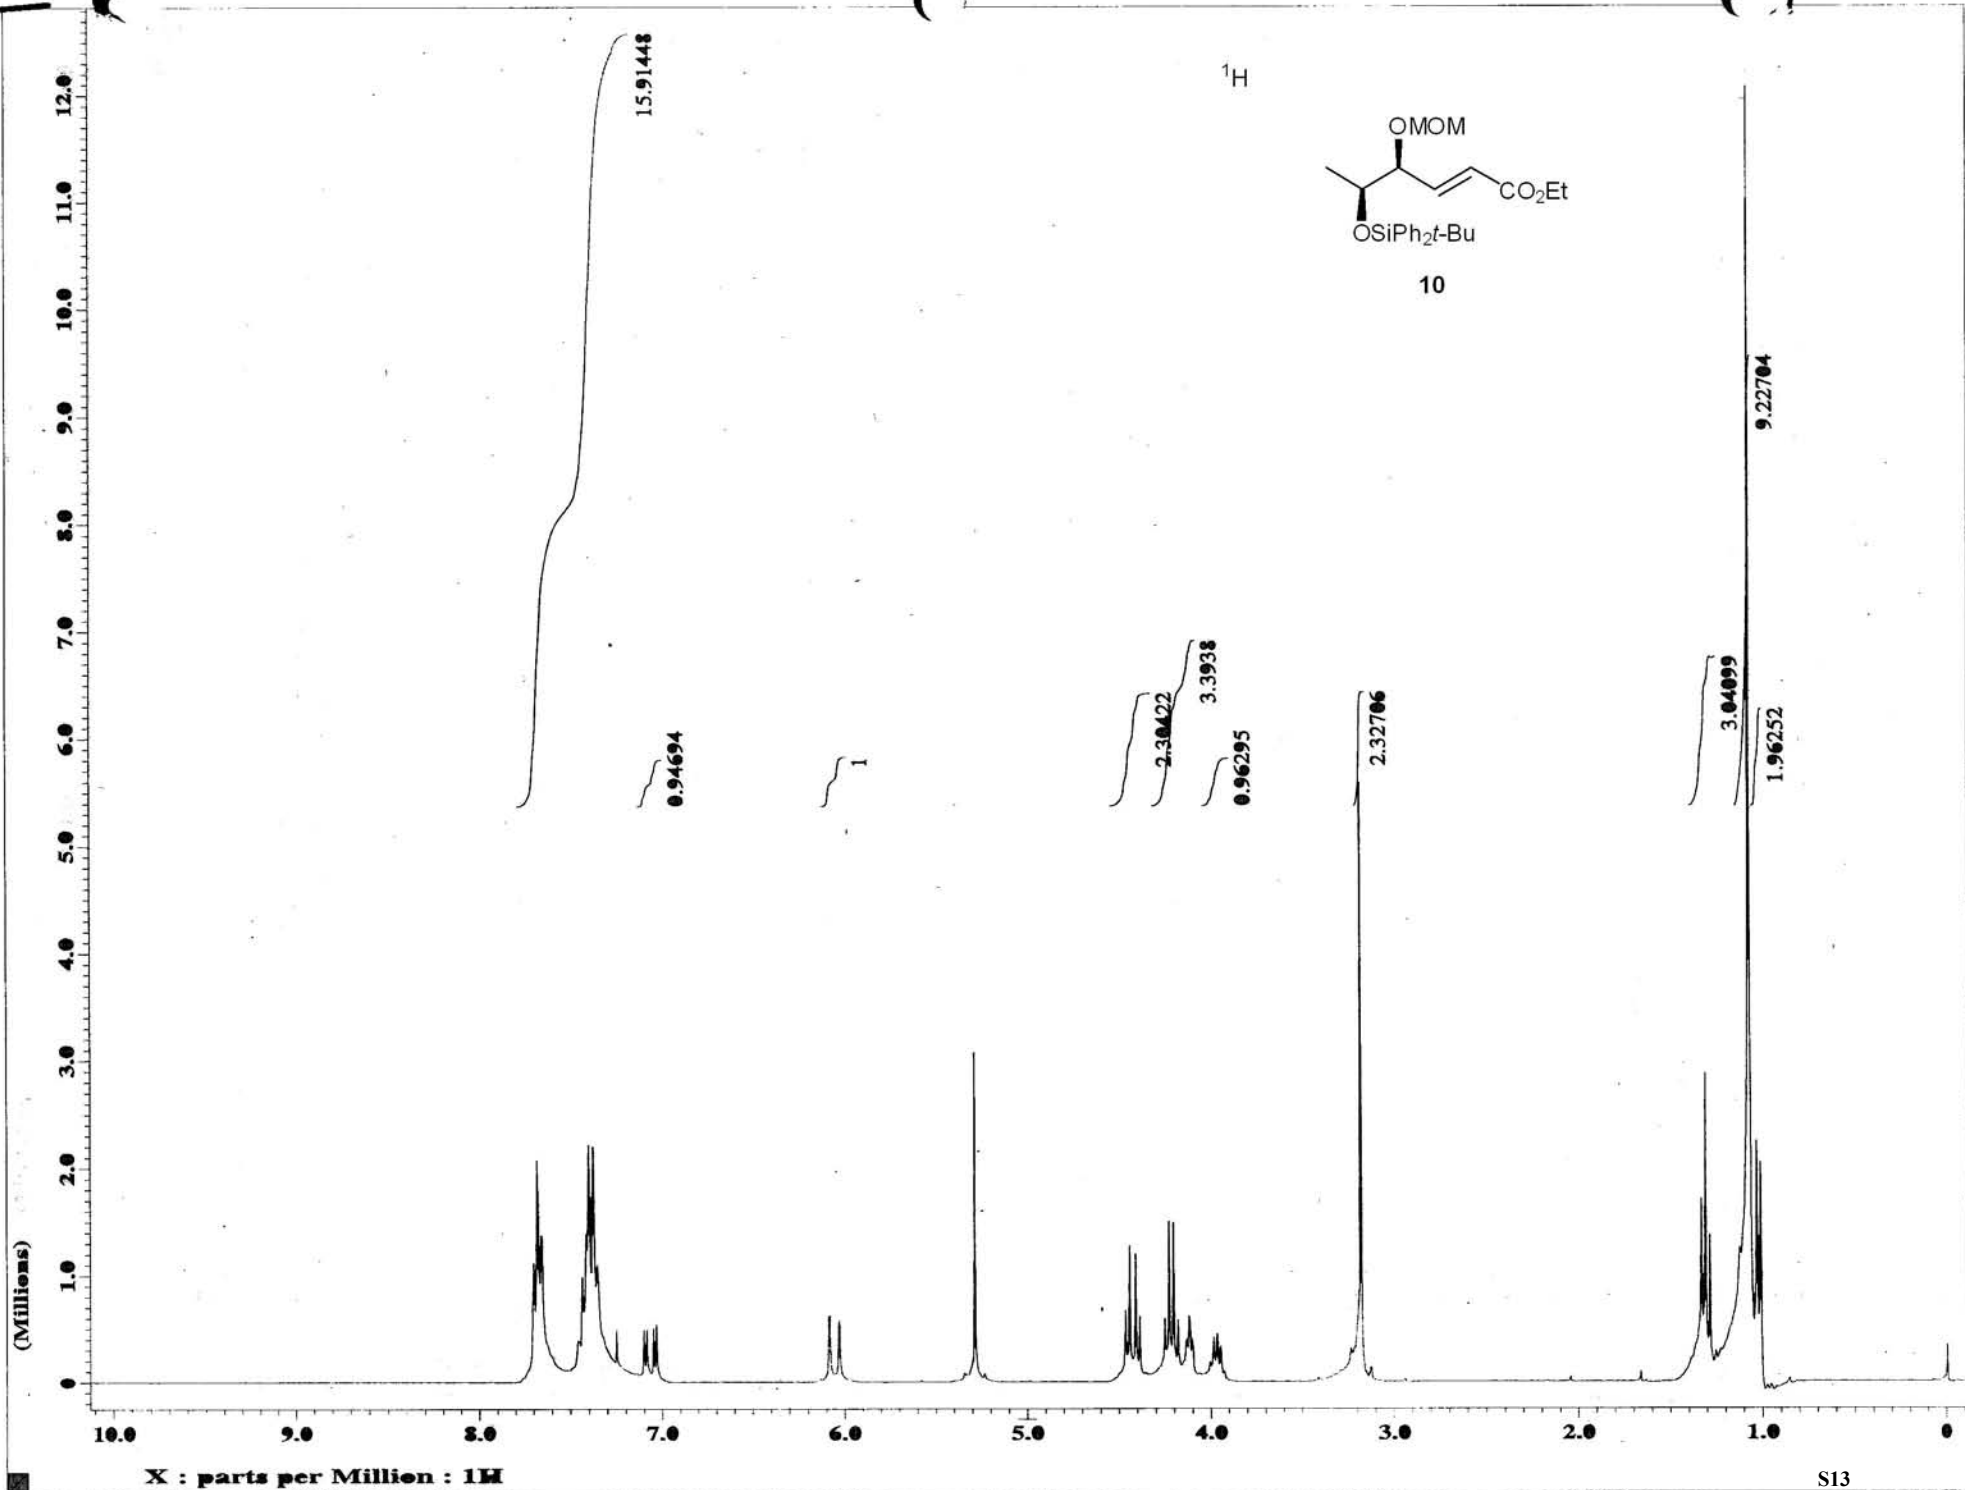

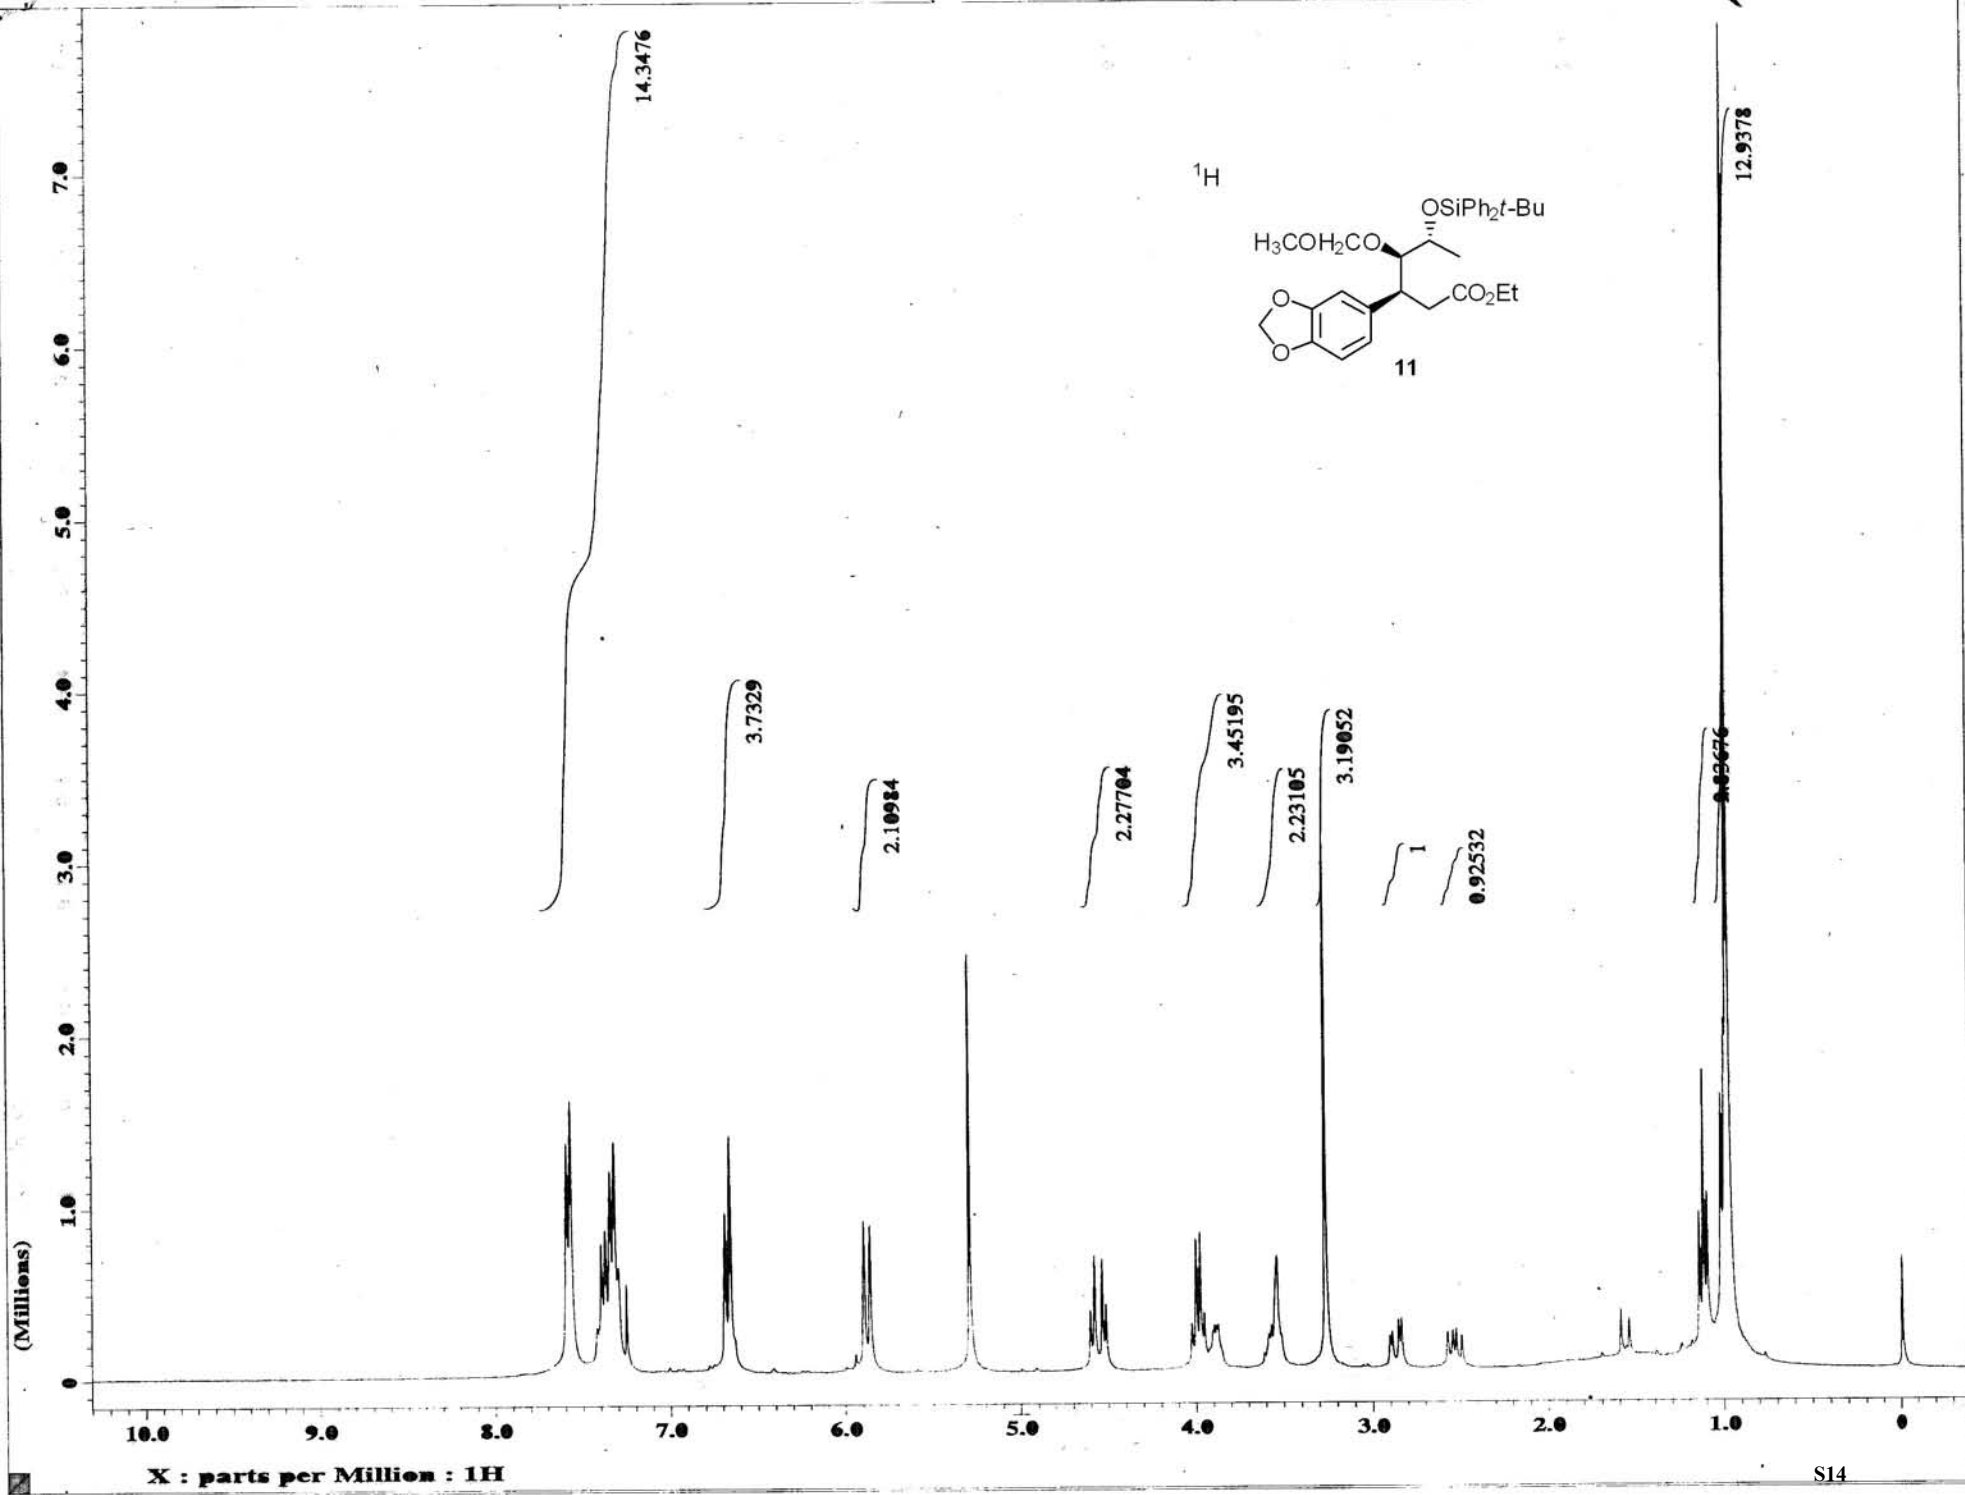

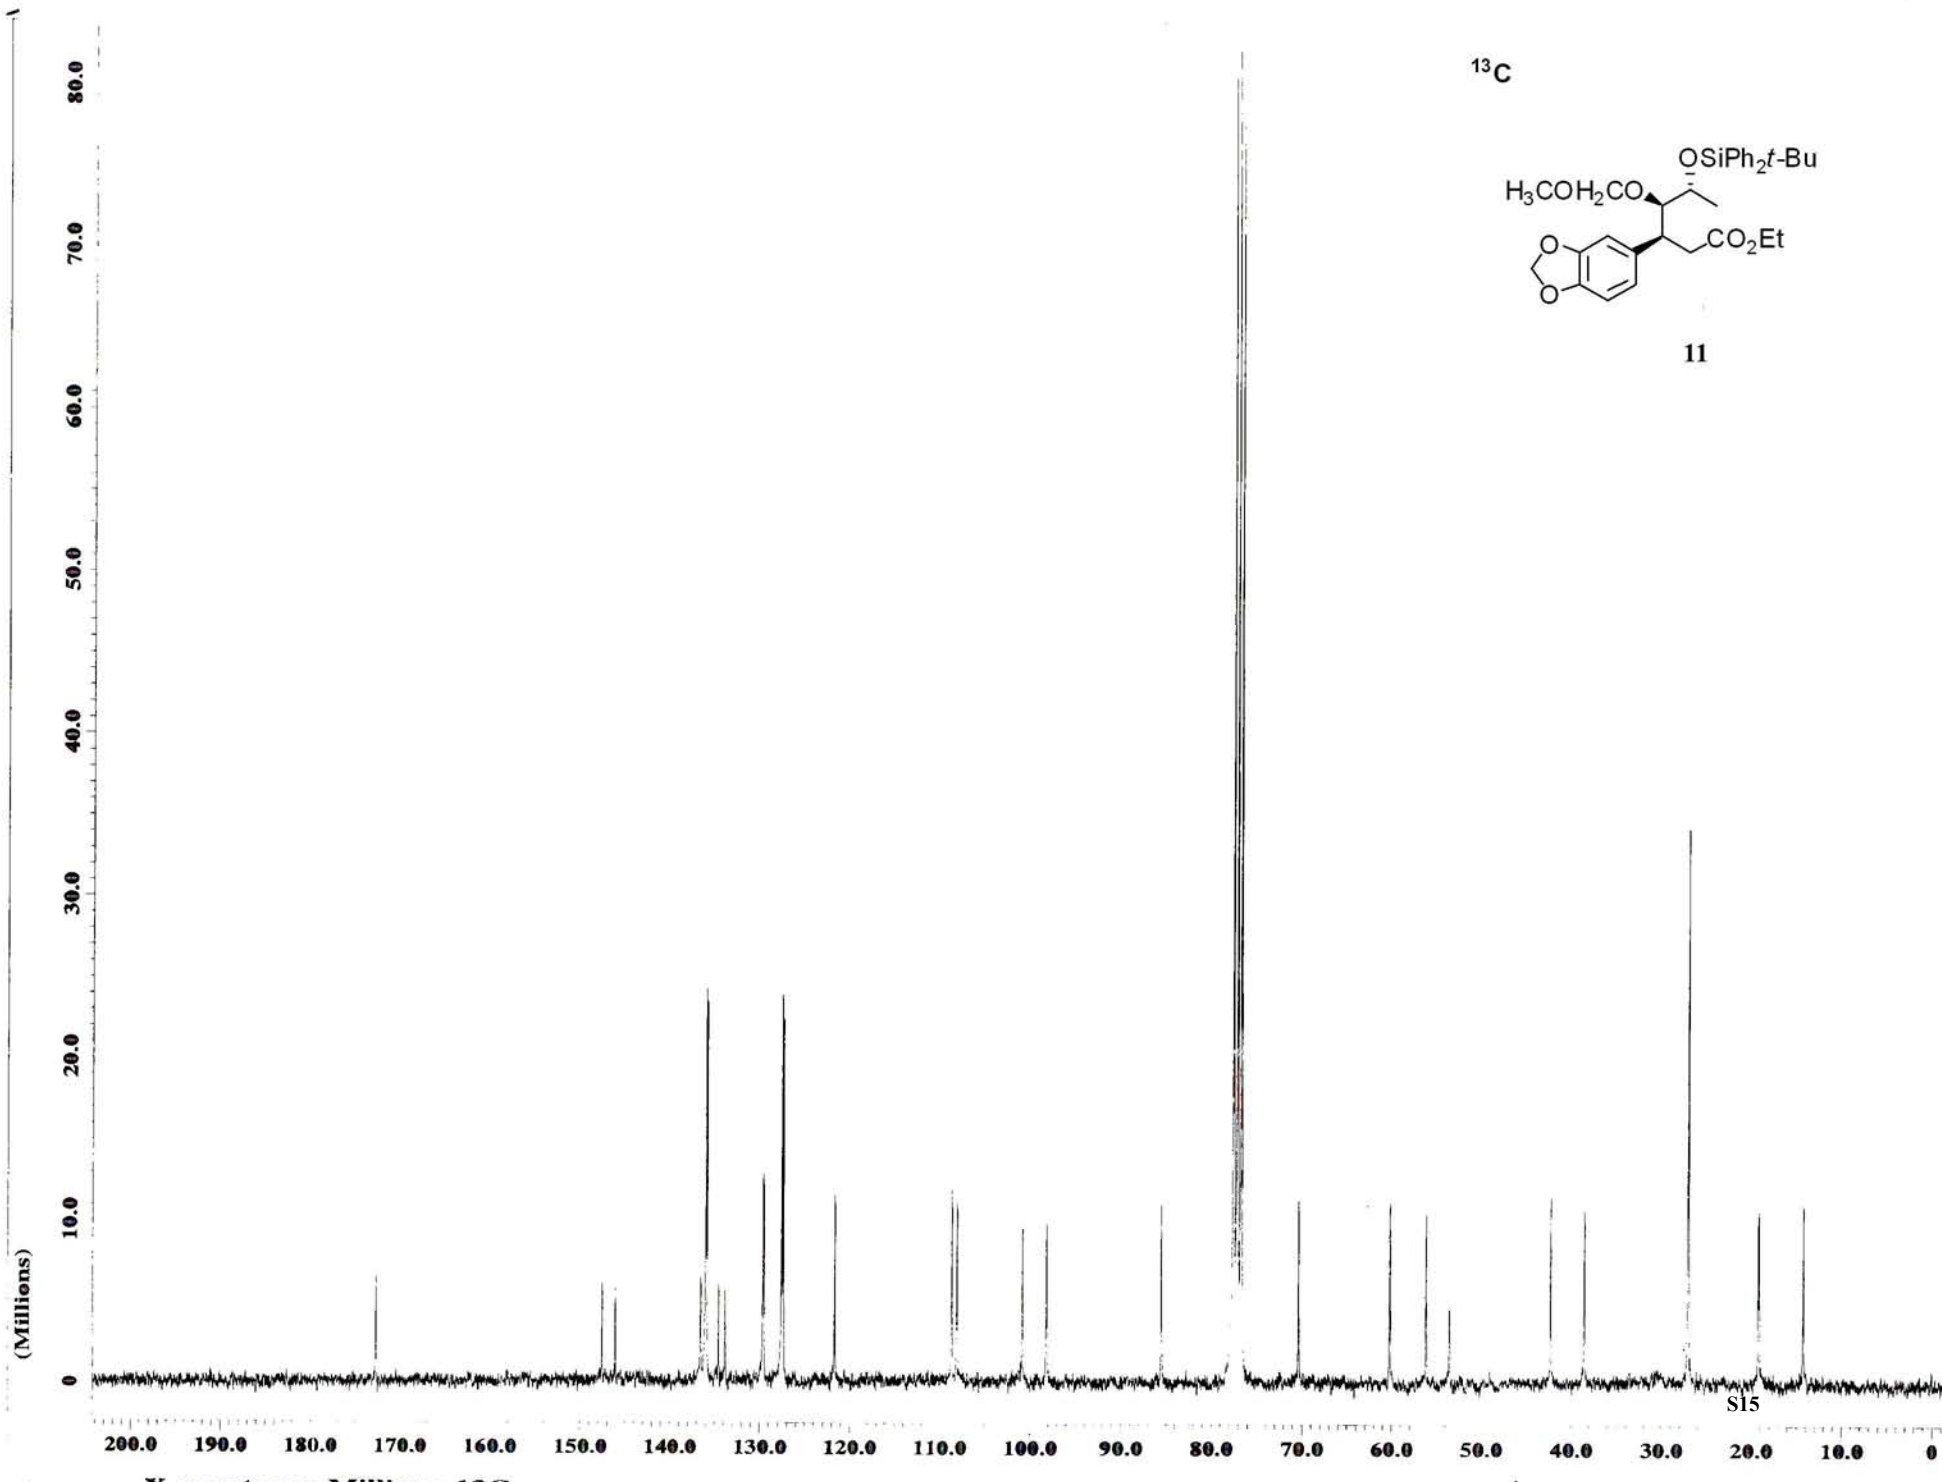

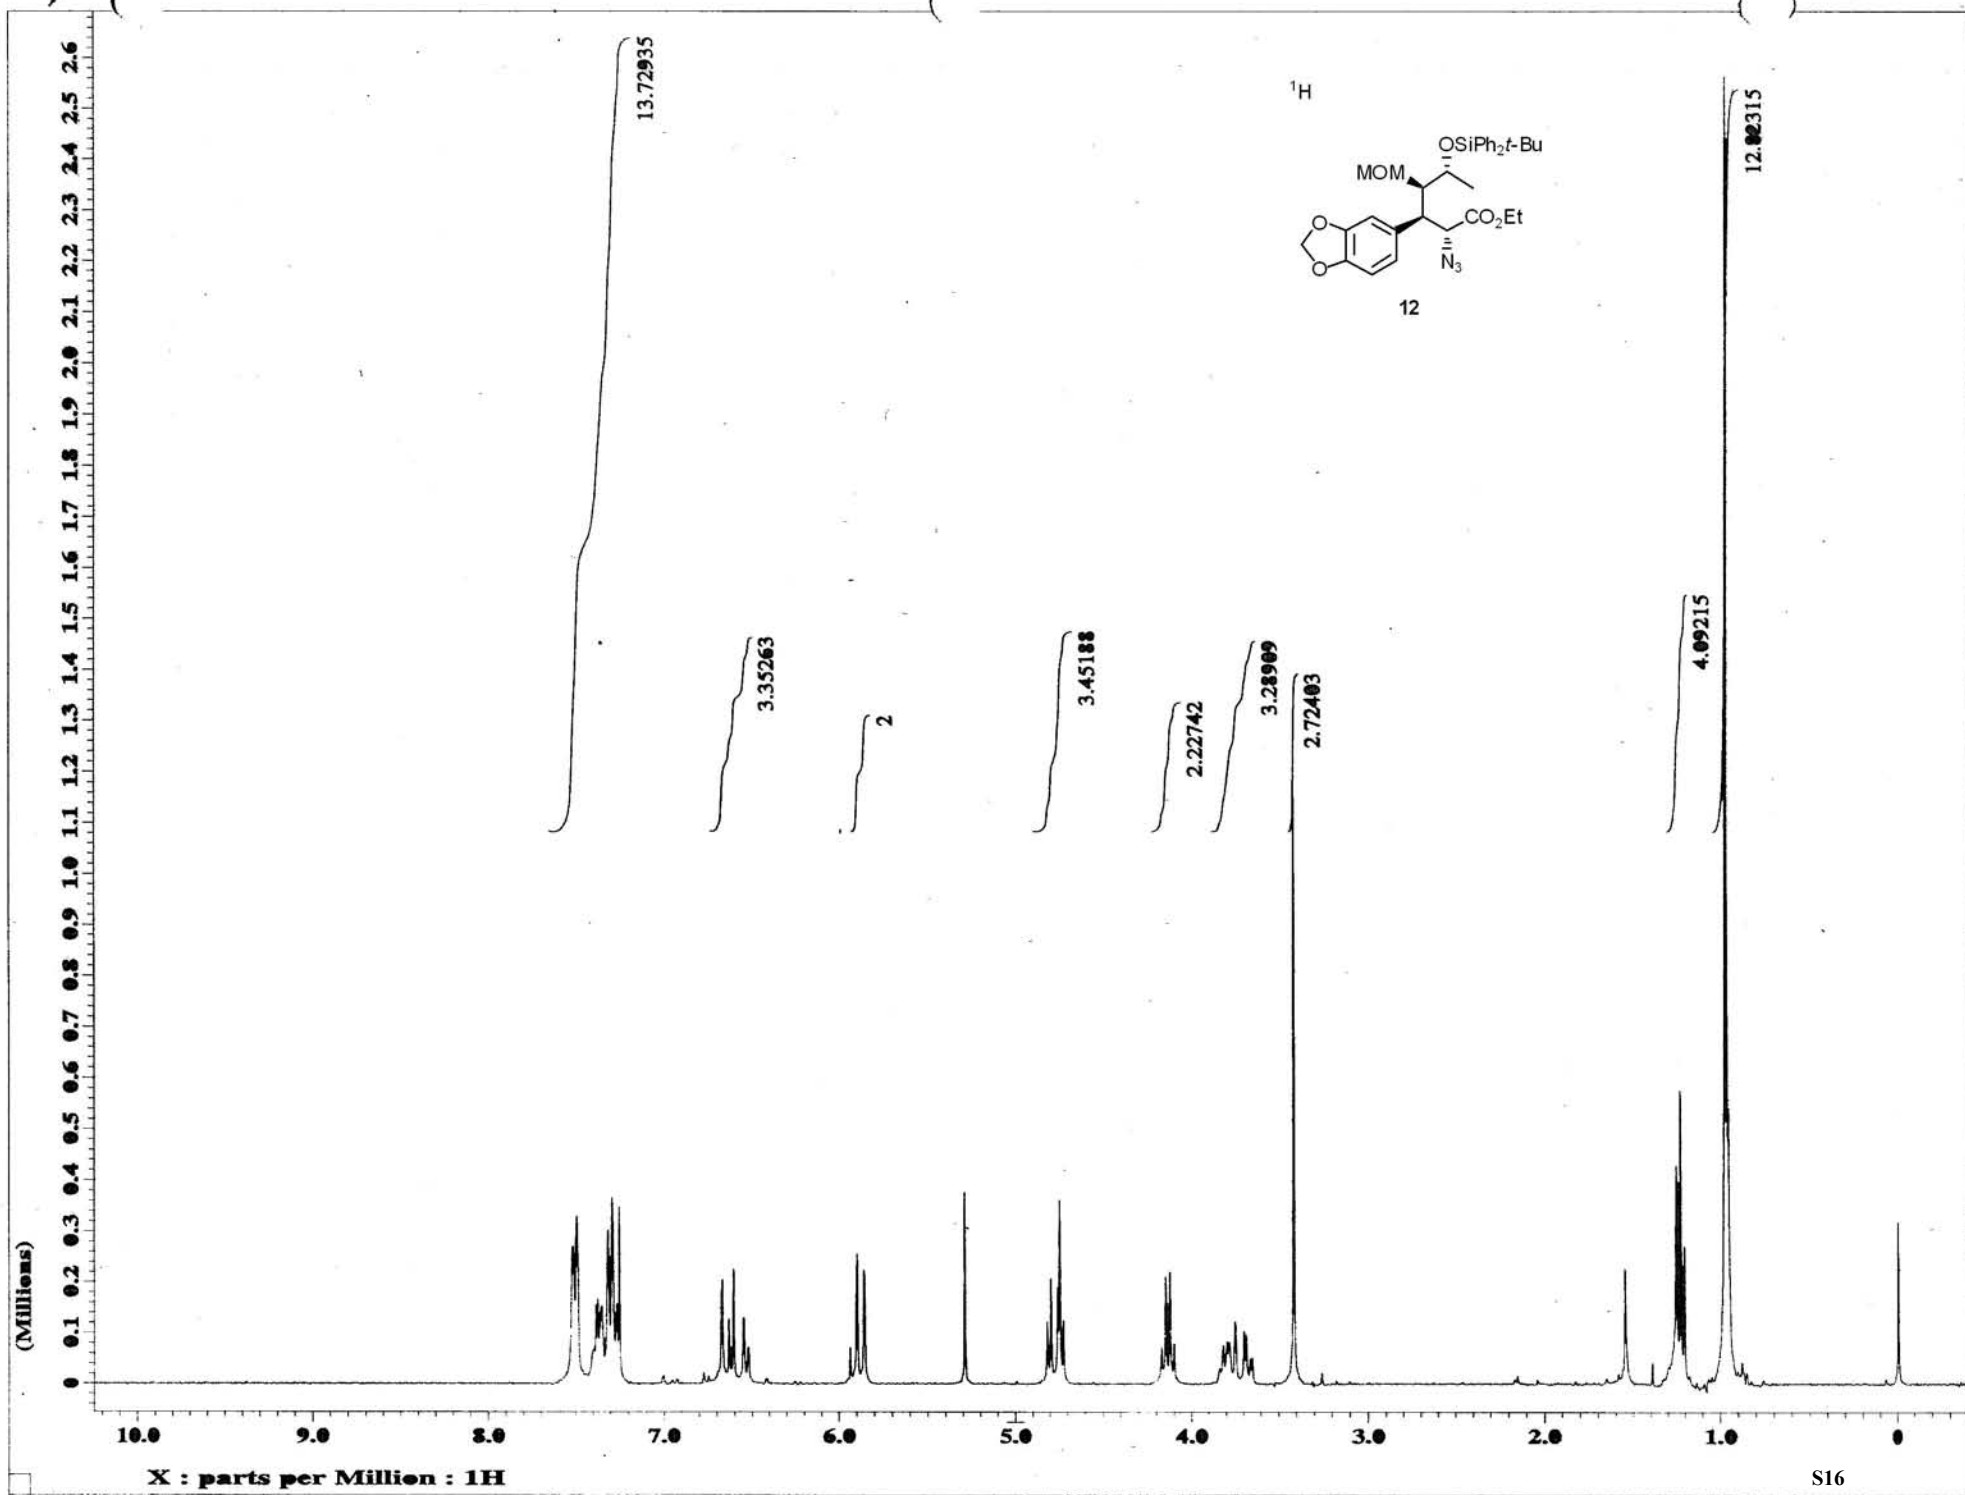



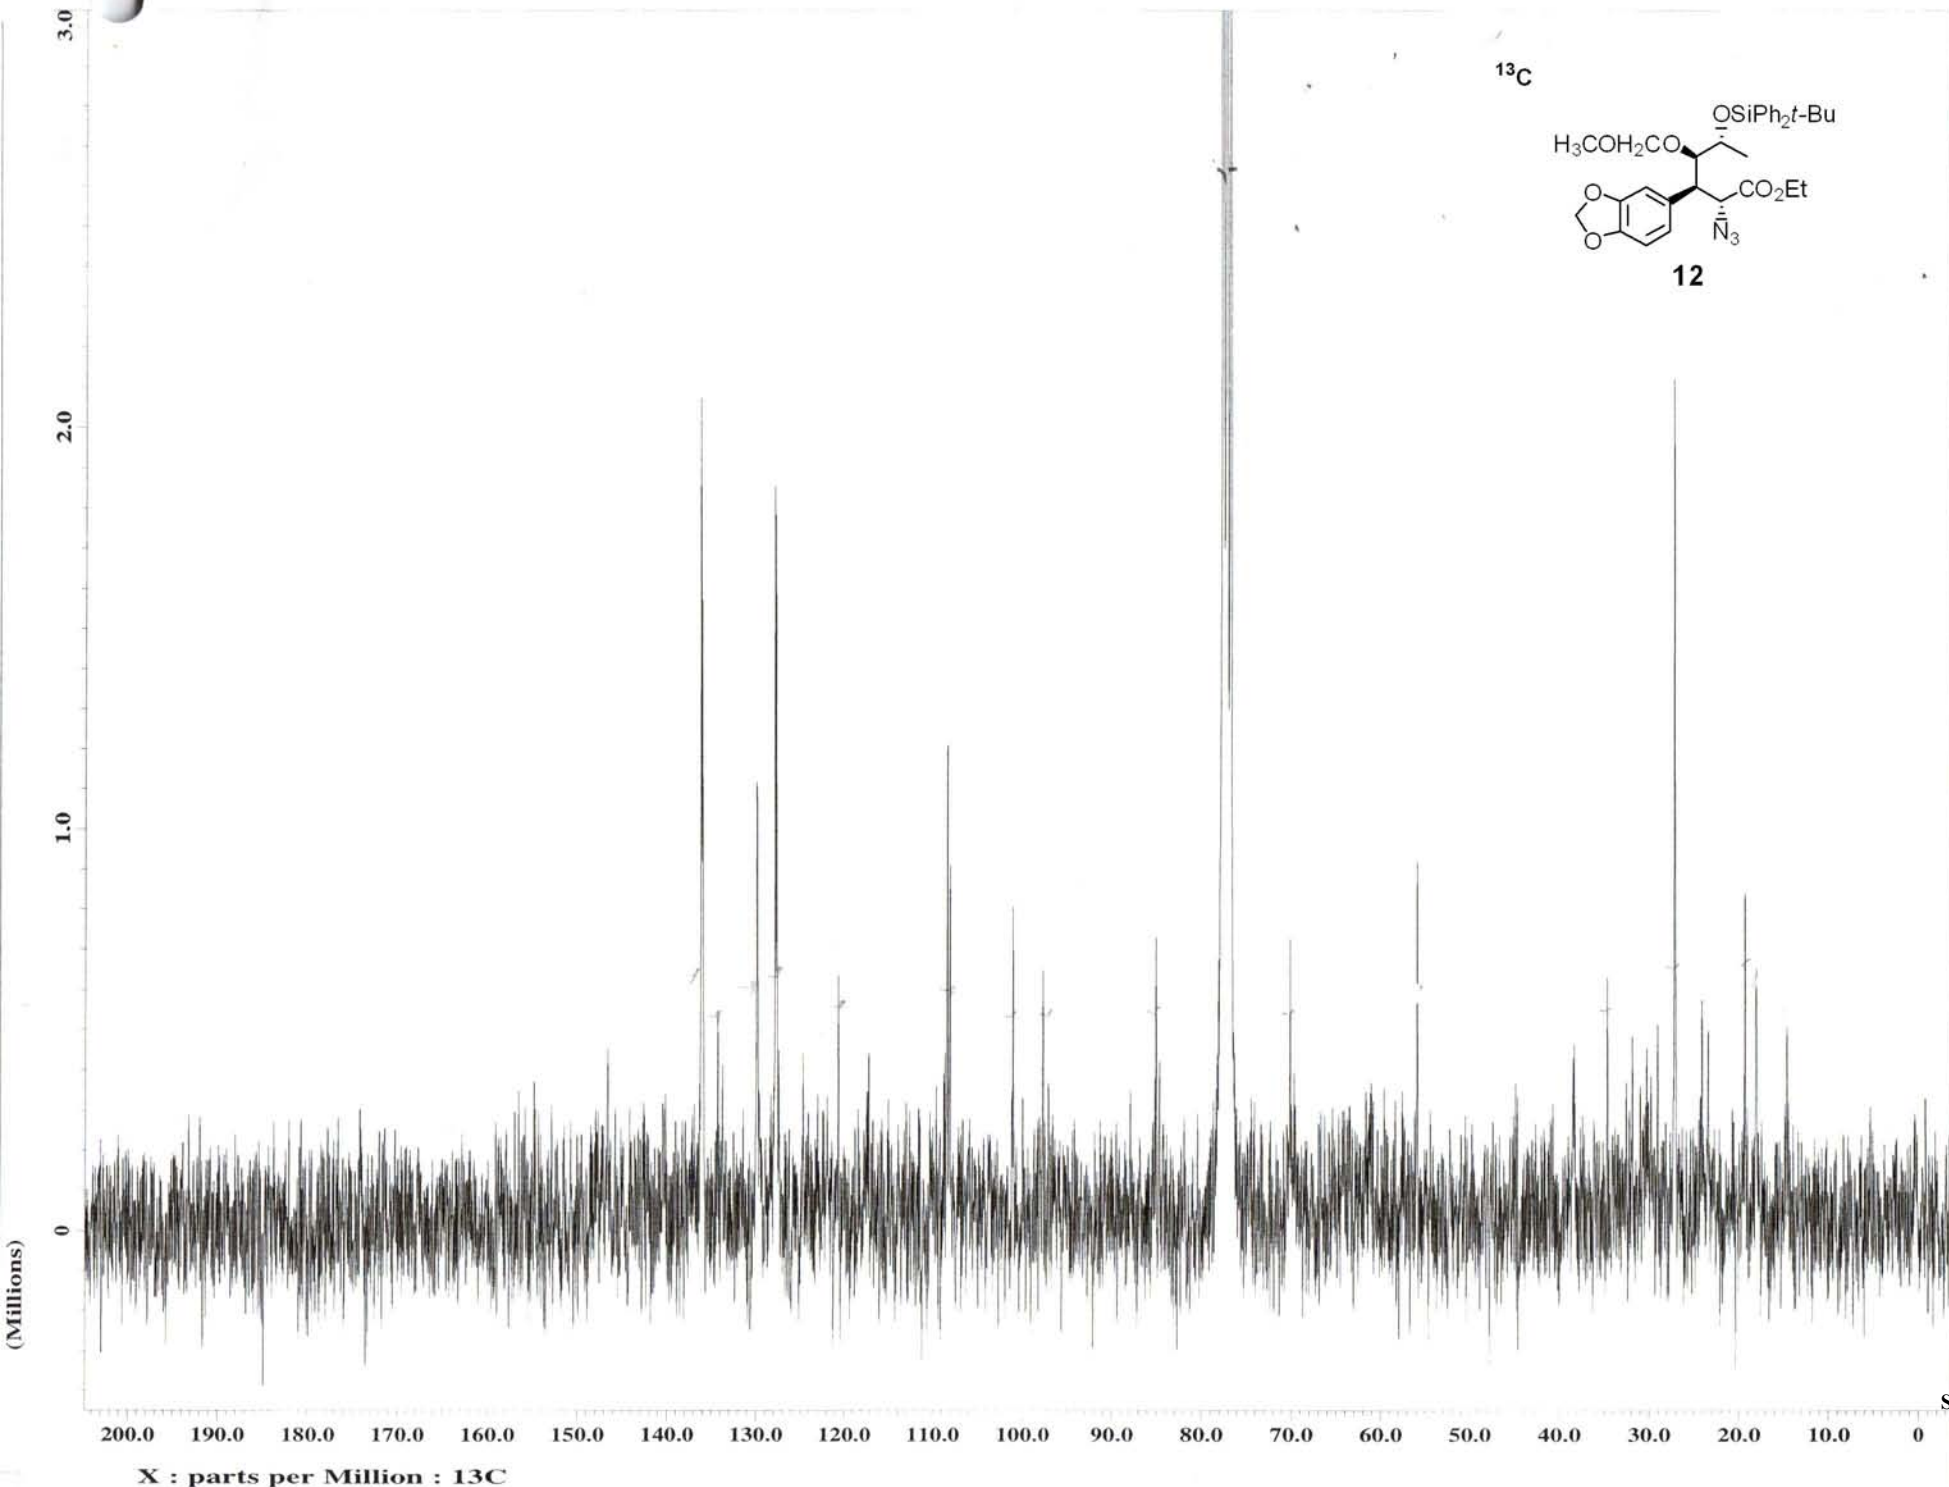

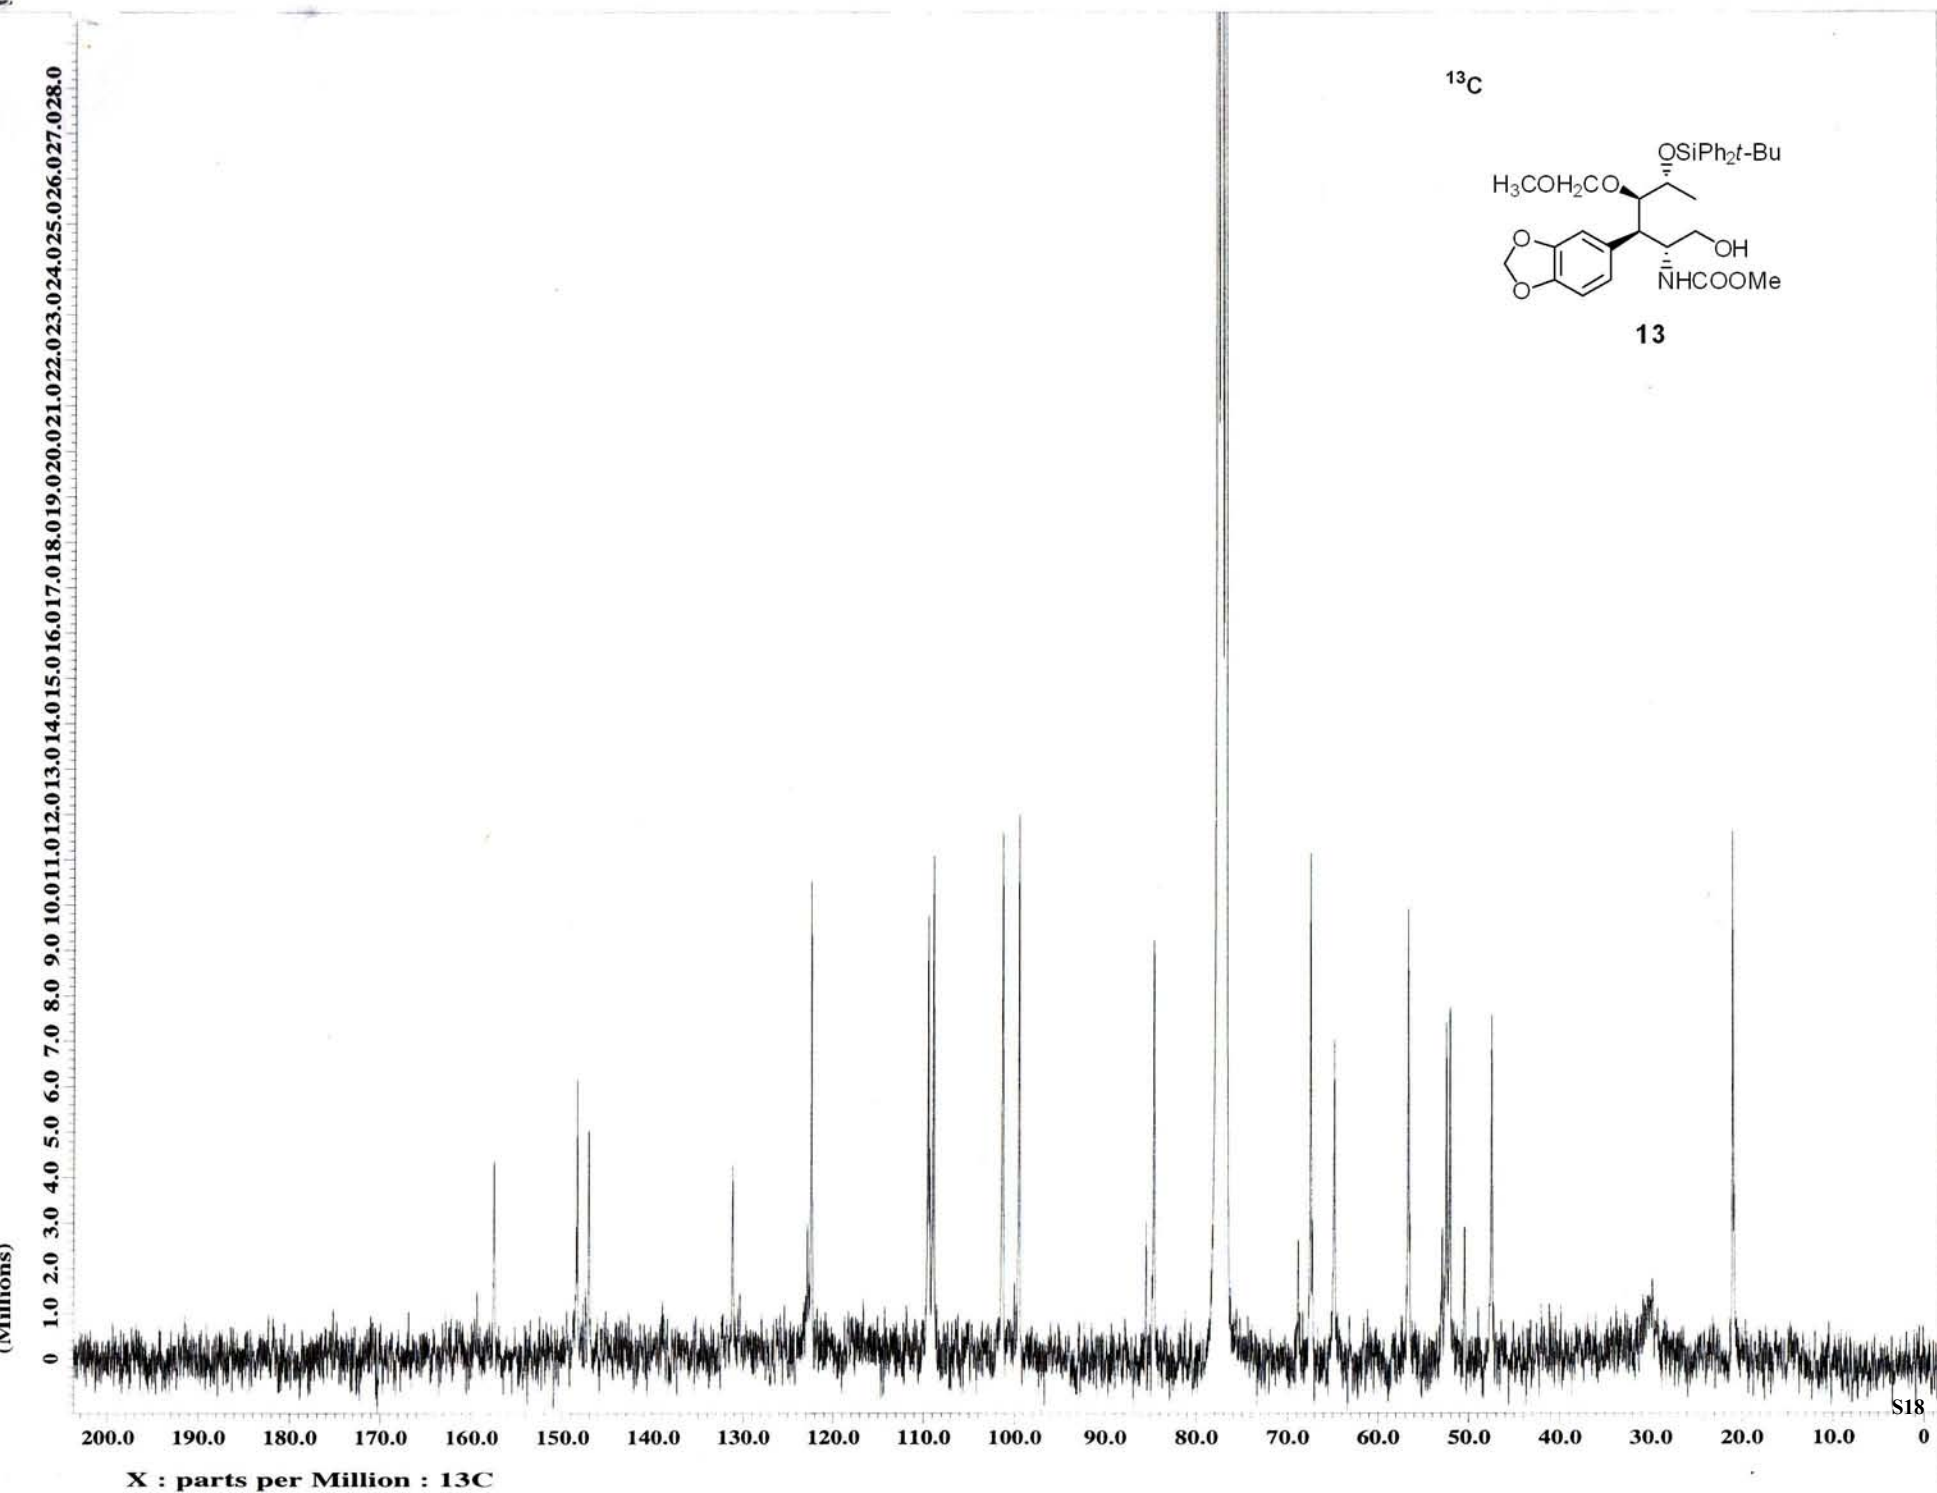

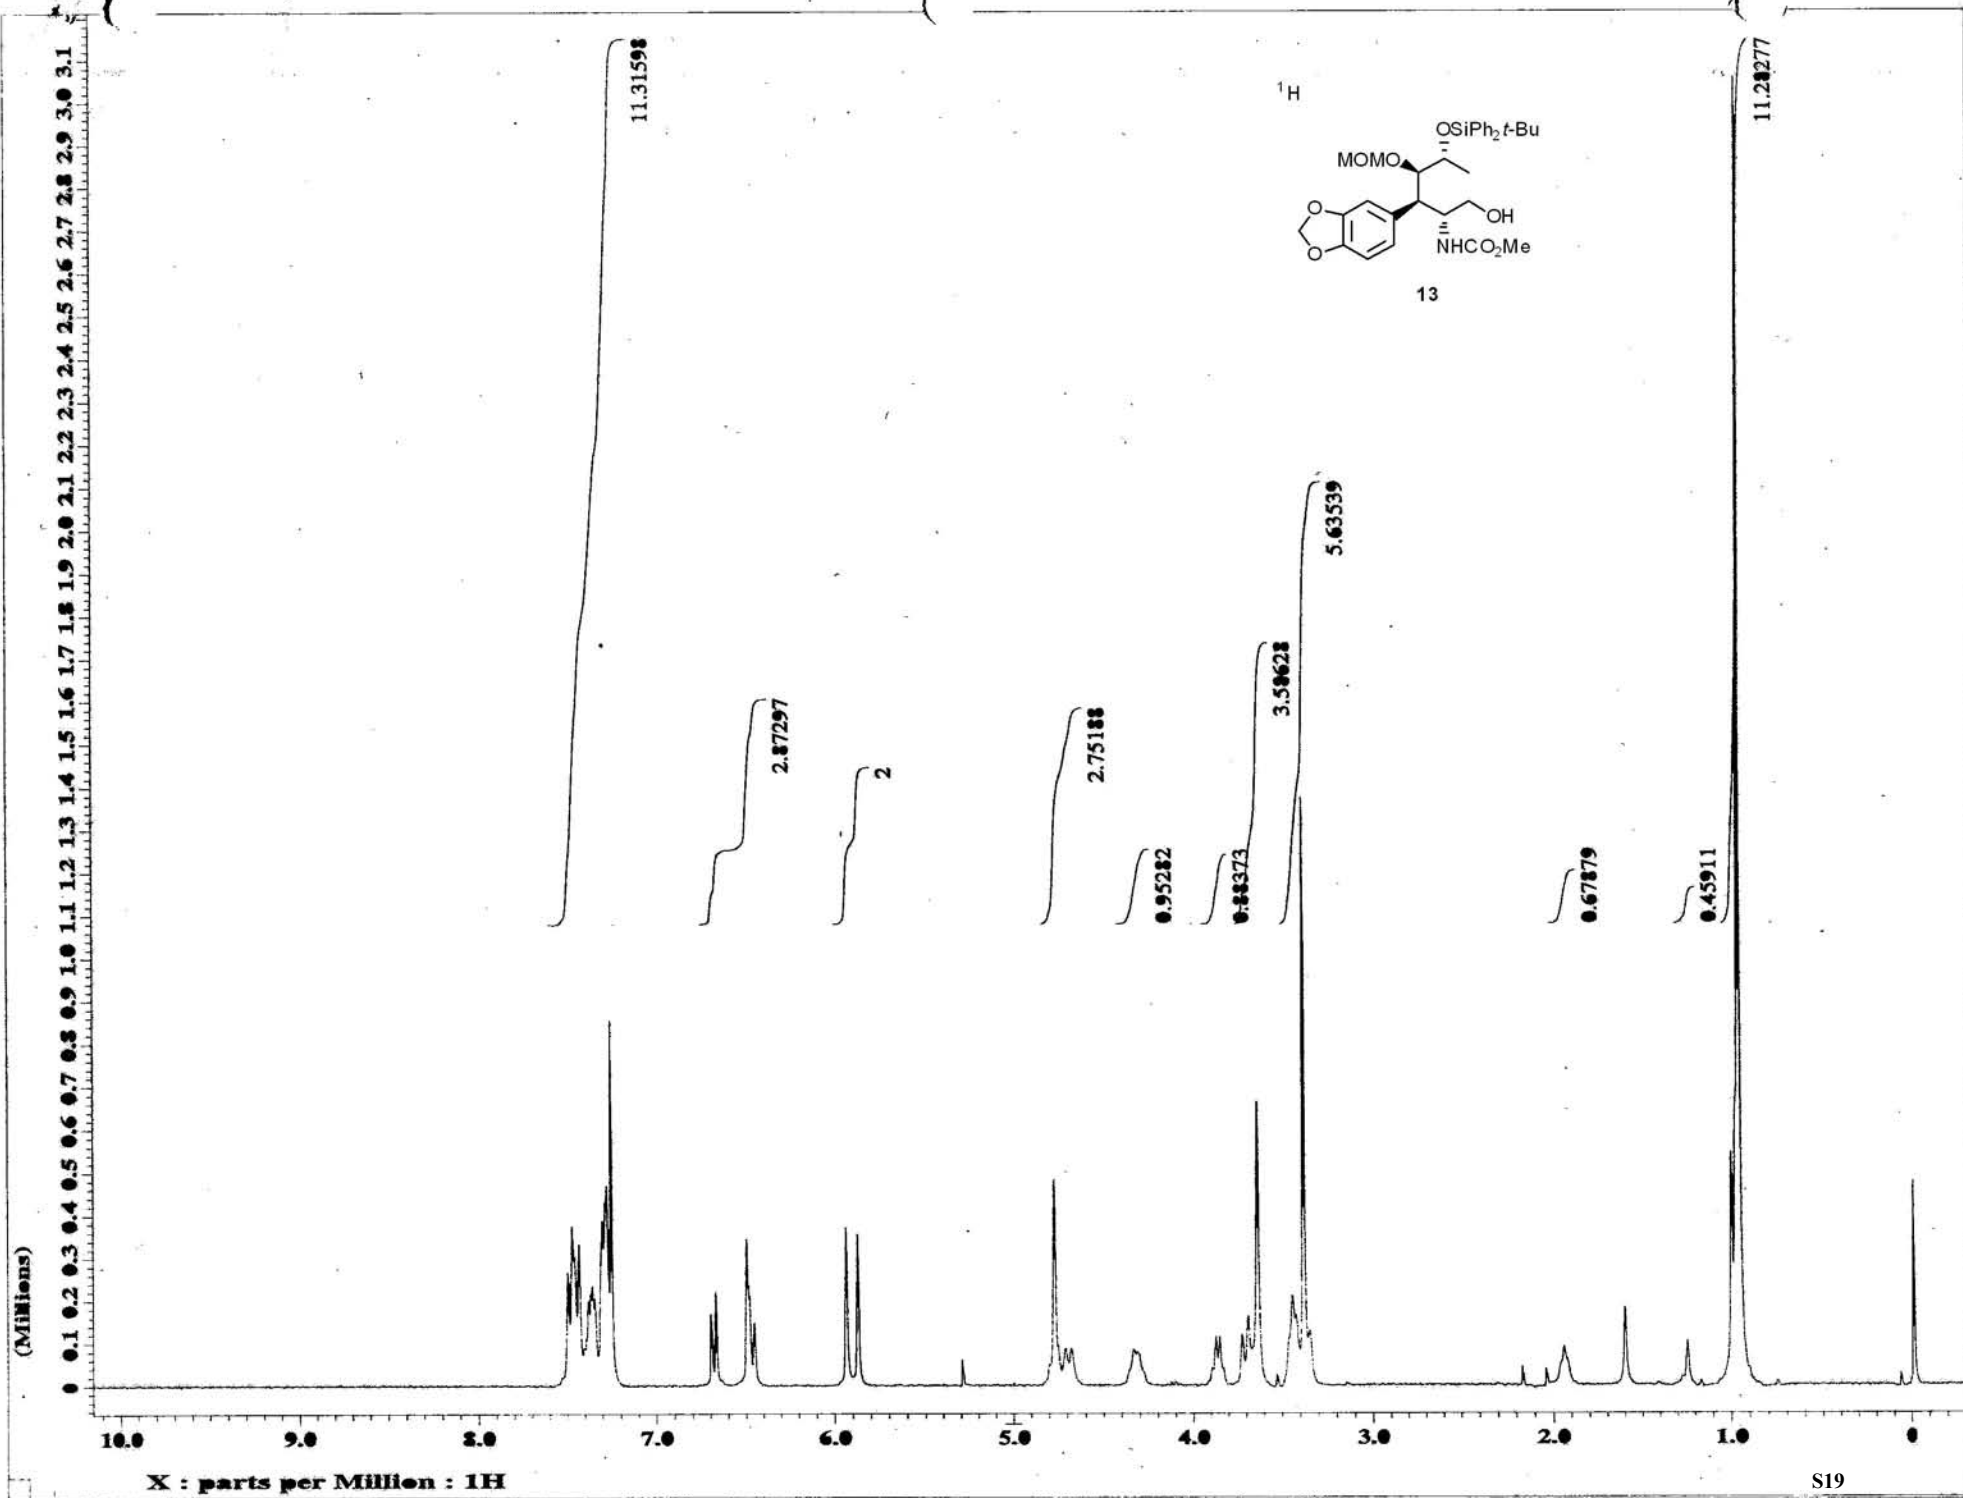

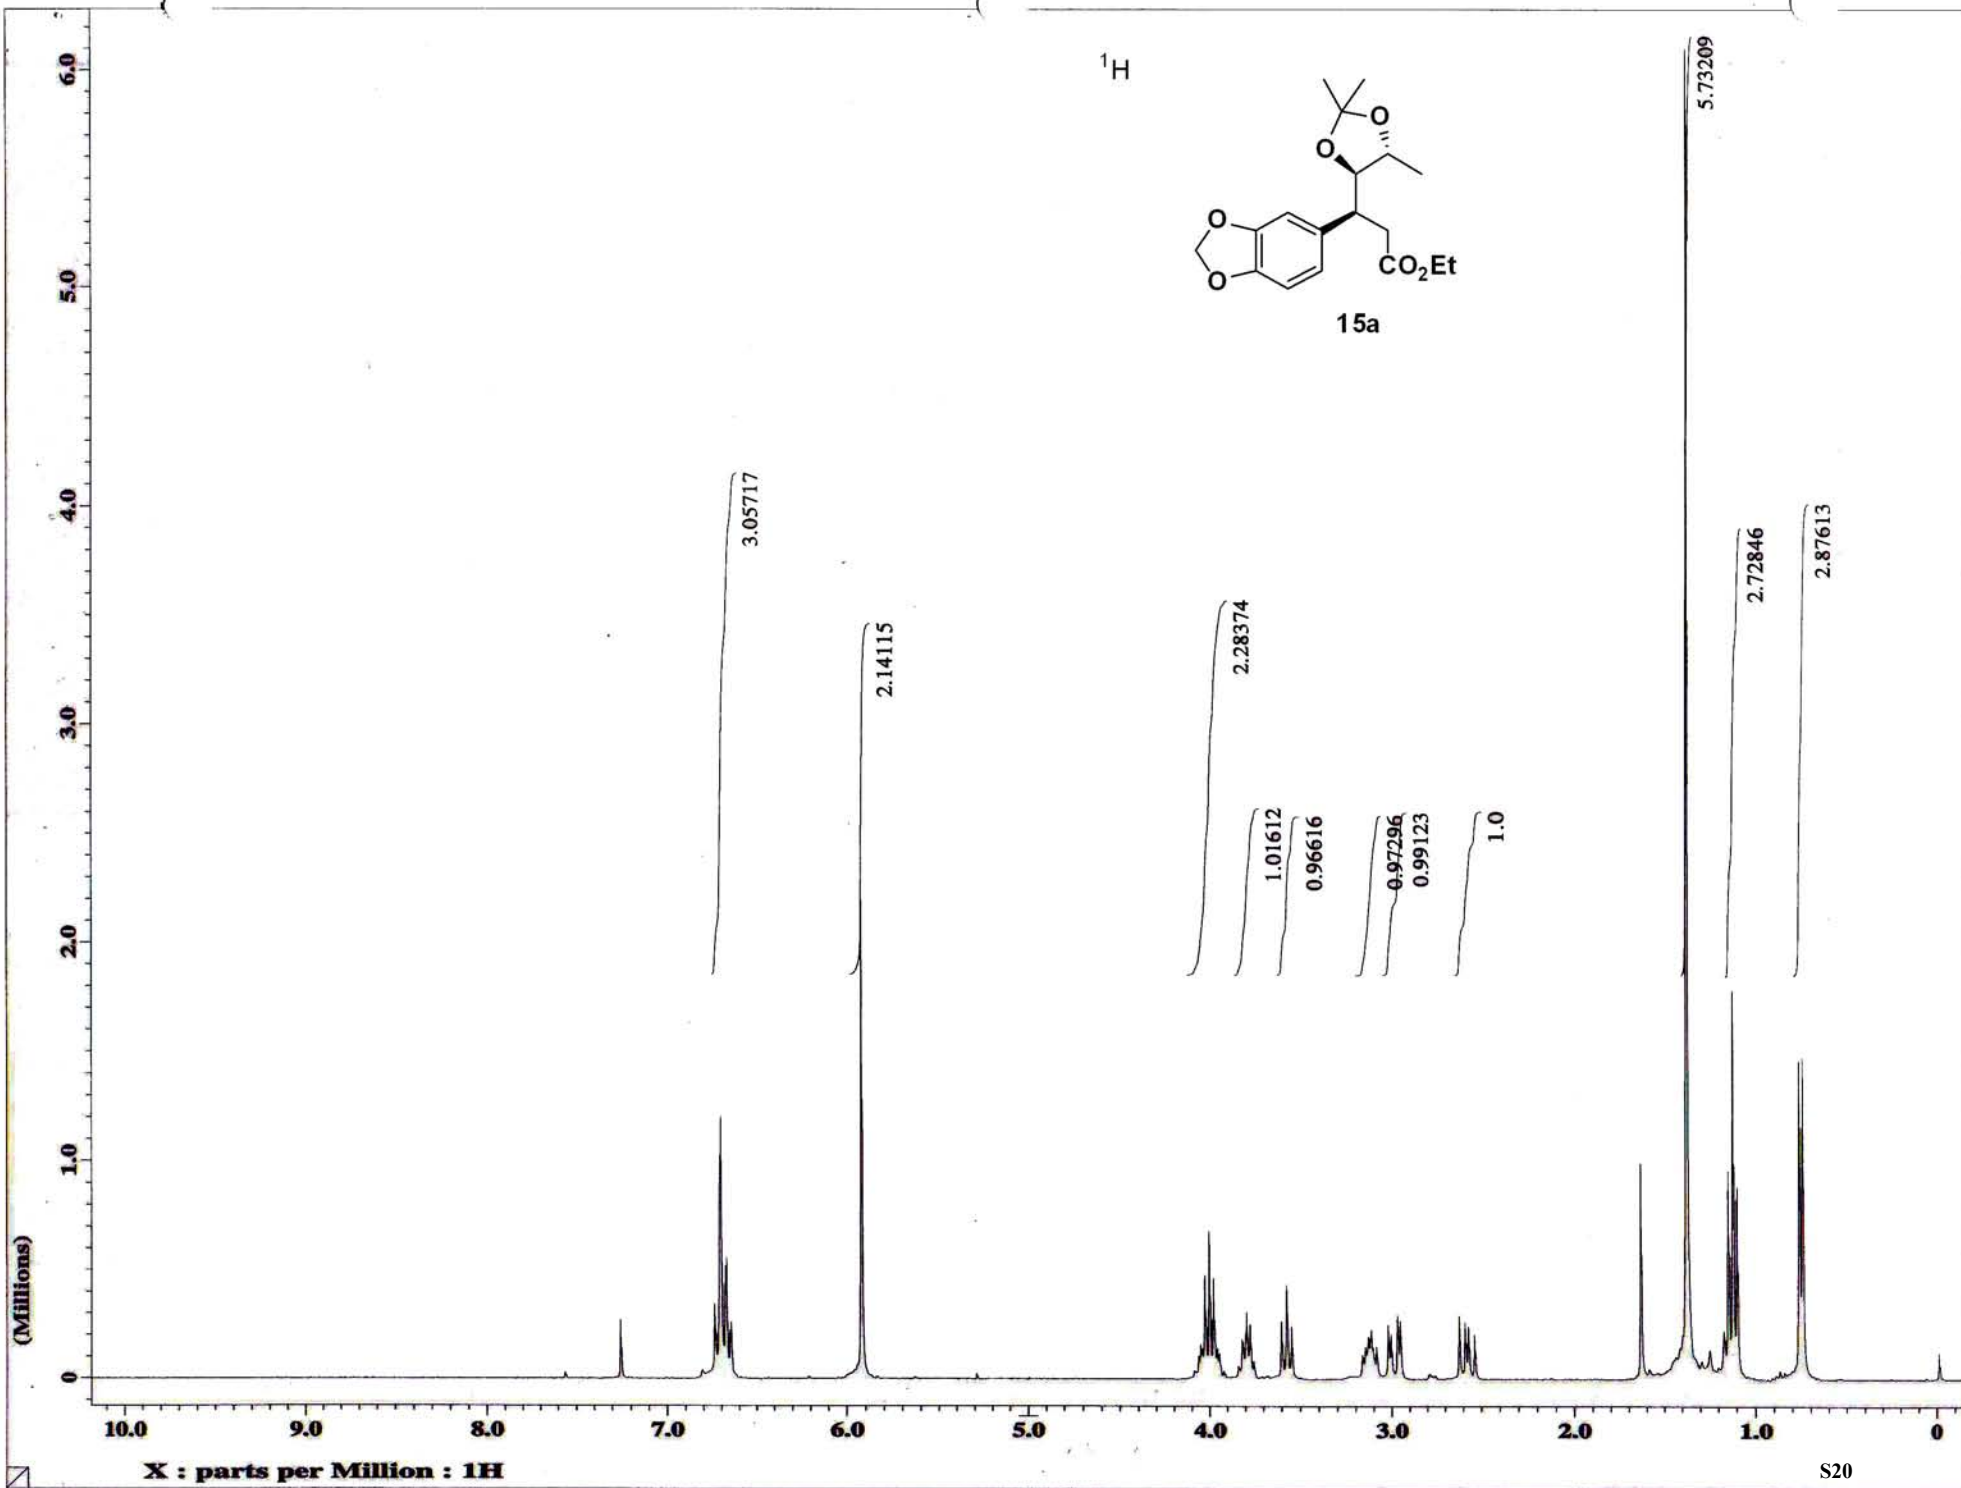

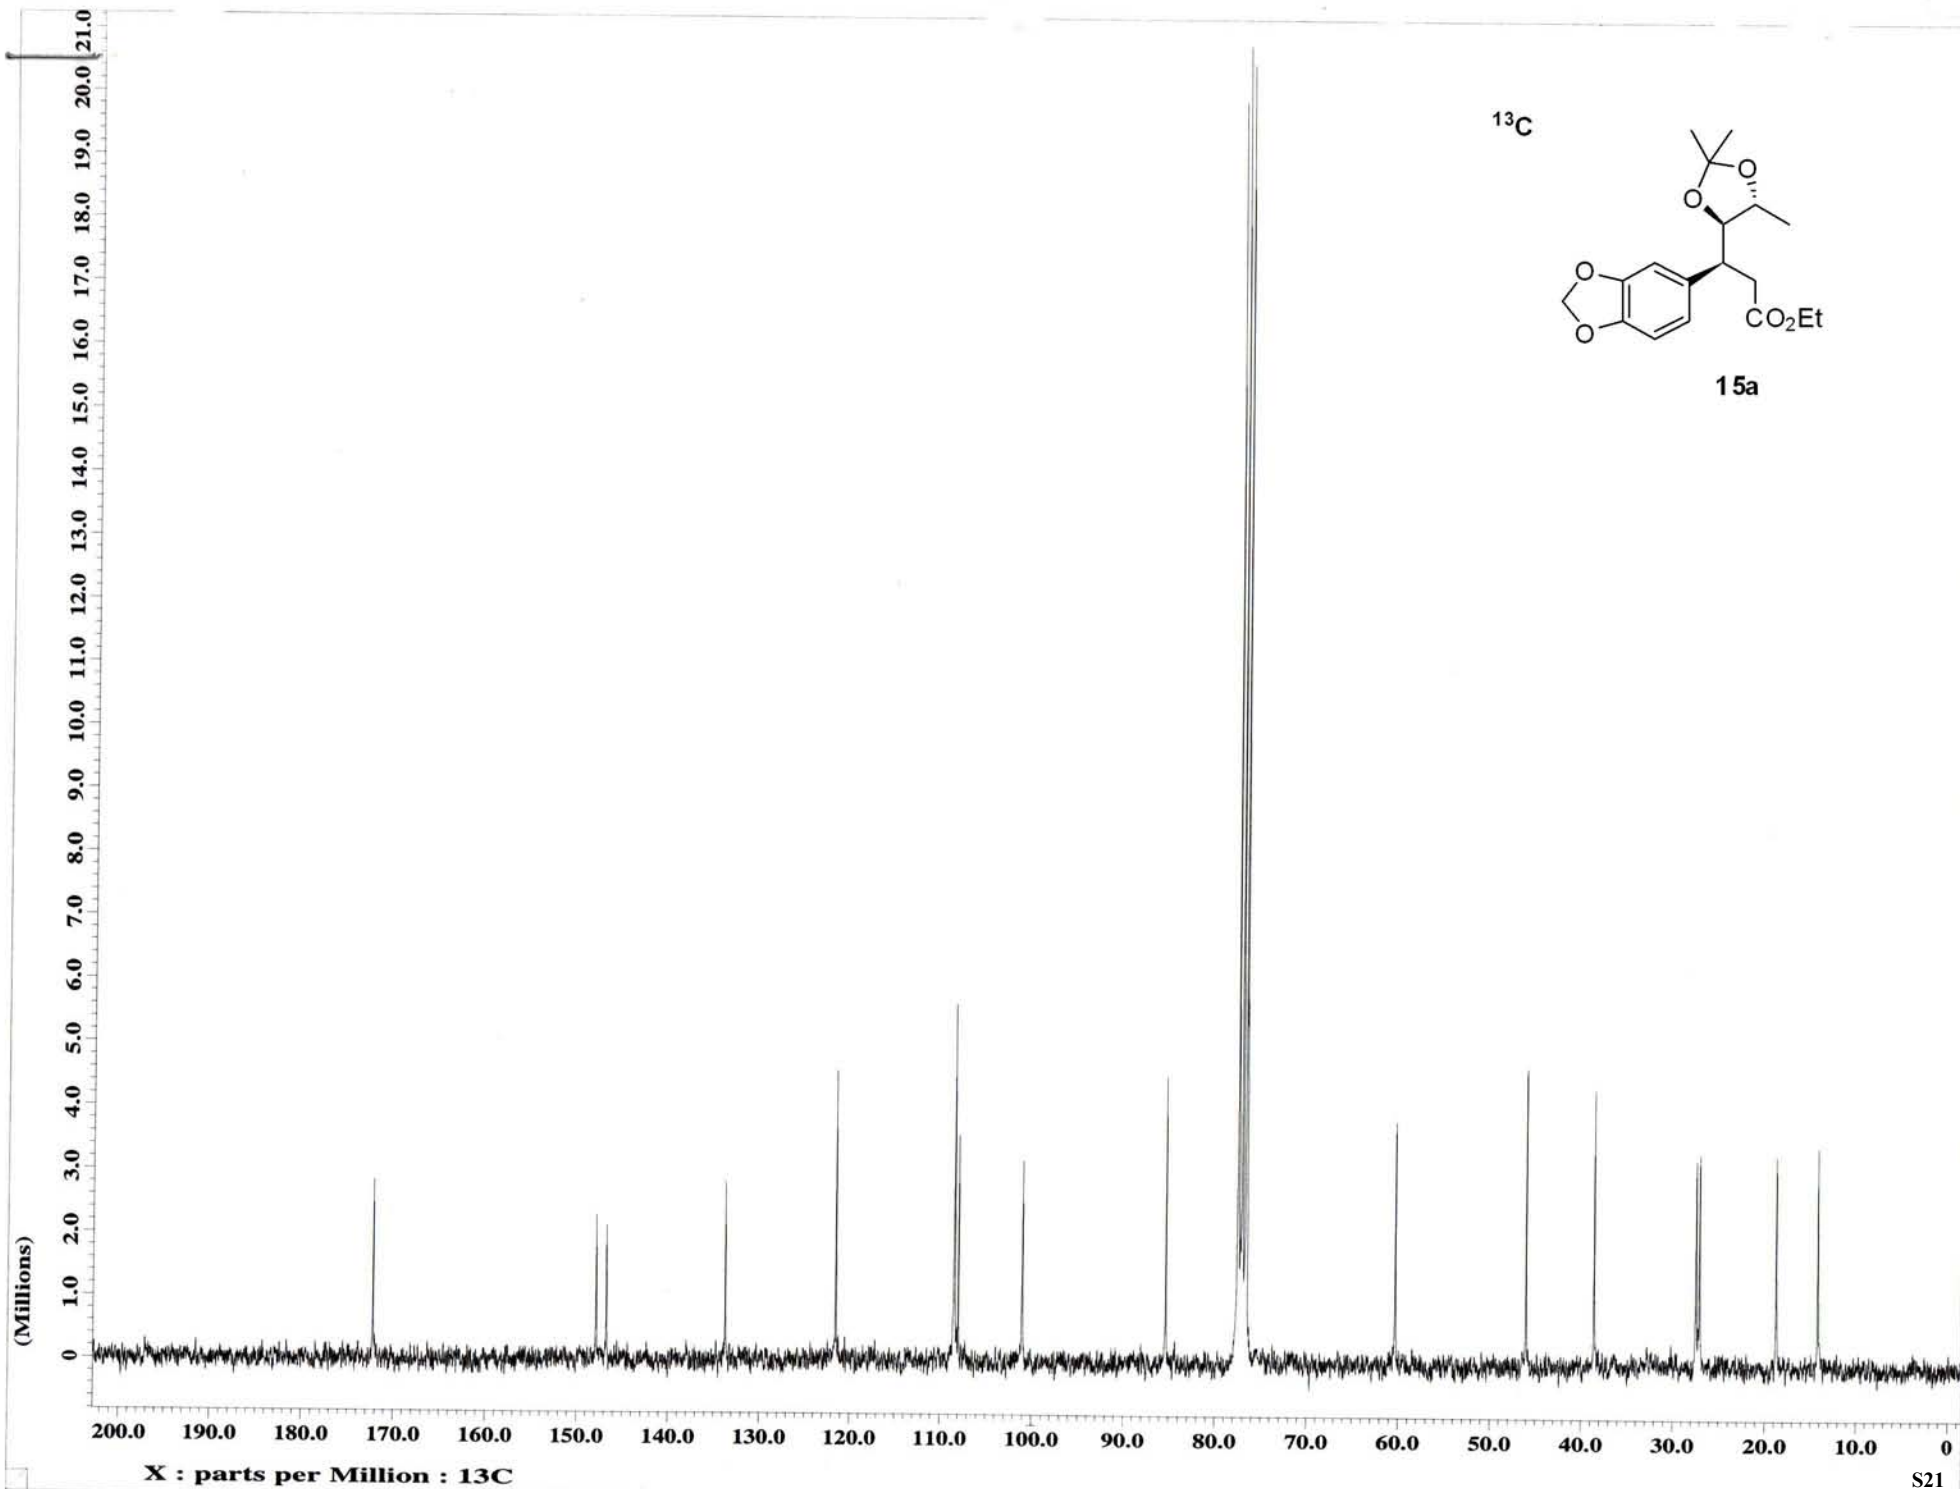

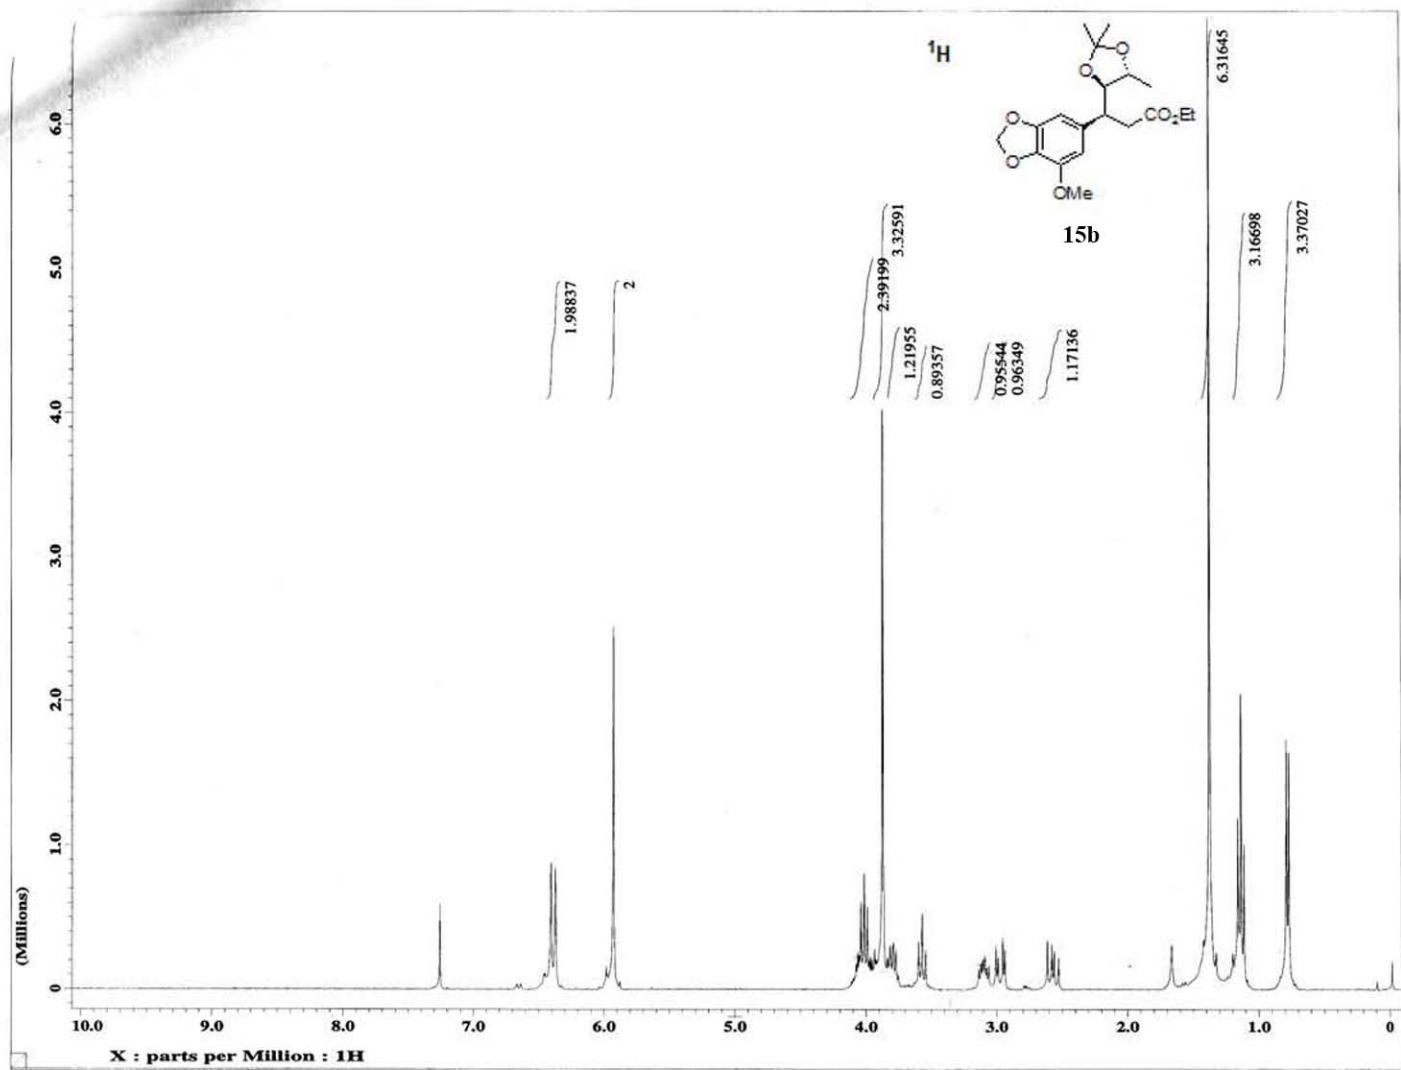

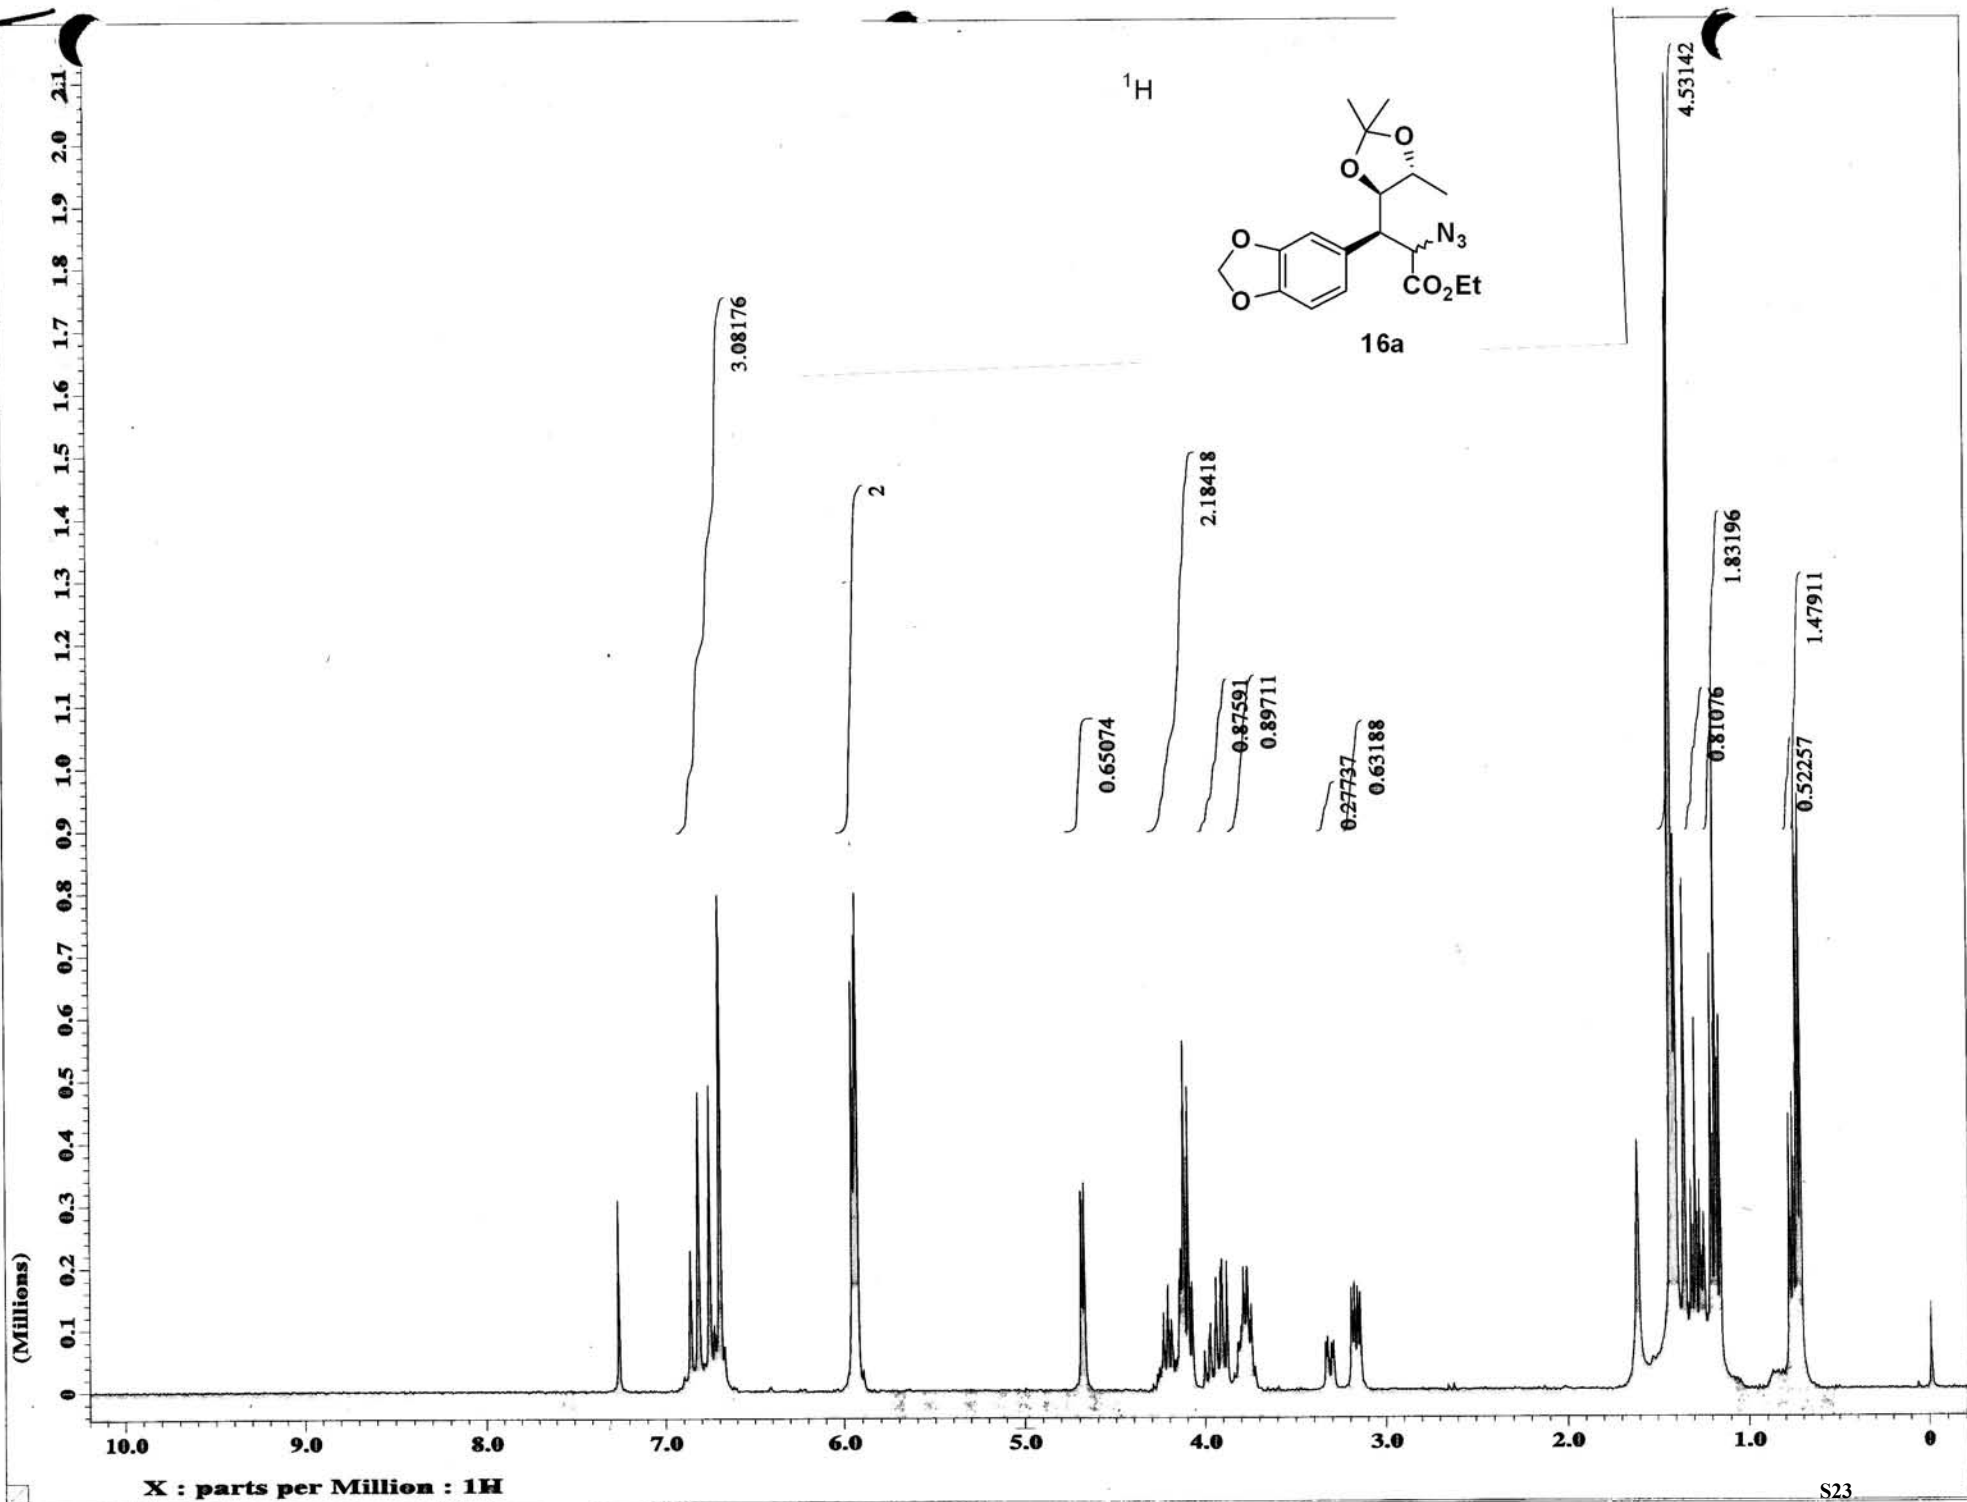

(Millions)

10.0  
9.0  
8.0  
7.0  
6.0  
5.0  
4.0  
3.0  
2.0  
1.0  
0

210.0 200.0 190.0 180.0 170.0 160.0 150.0 140.0 130.0 120.0 110.0 100.0 90.0 80.0 70.0 60.0 50.0 40.0 30.0 20.0 10.0 0

X : parts per Million :  $^{13}\text{C}$

$^{13}\text{C}$

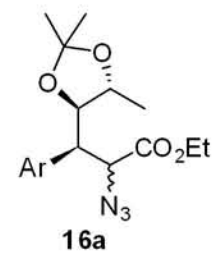



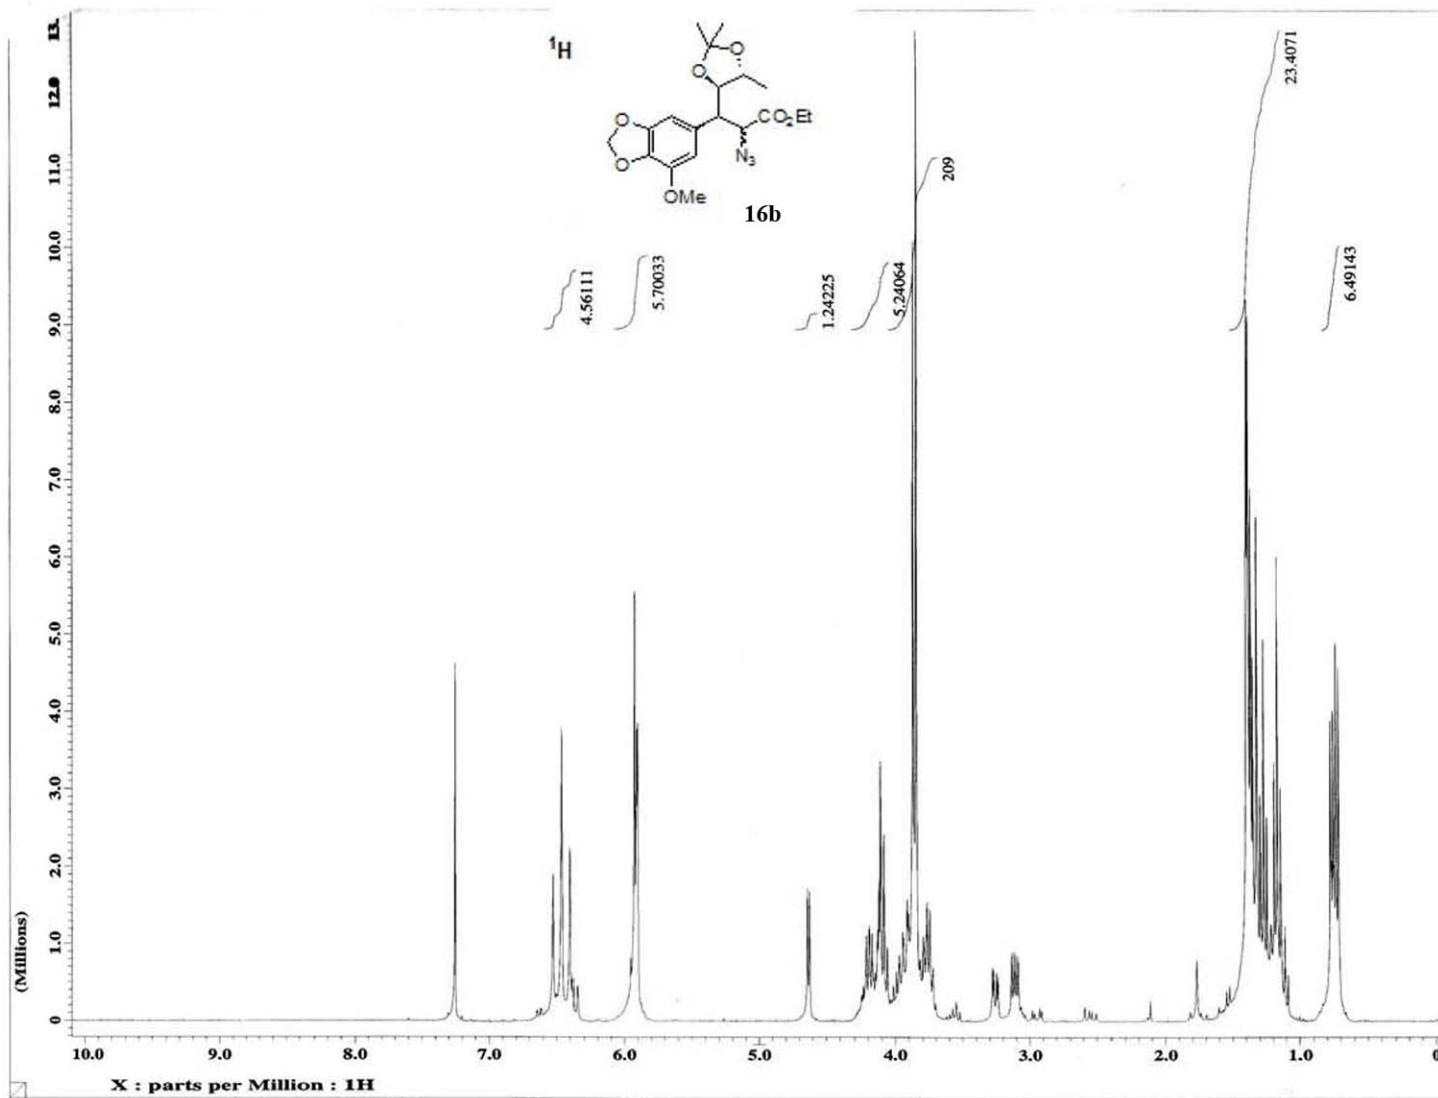

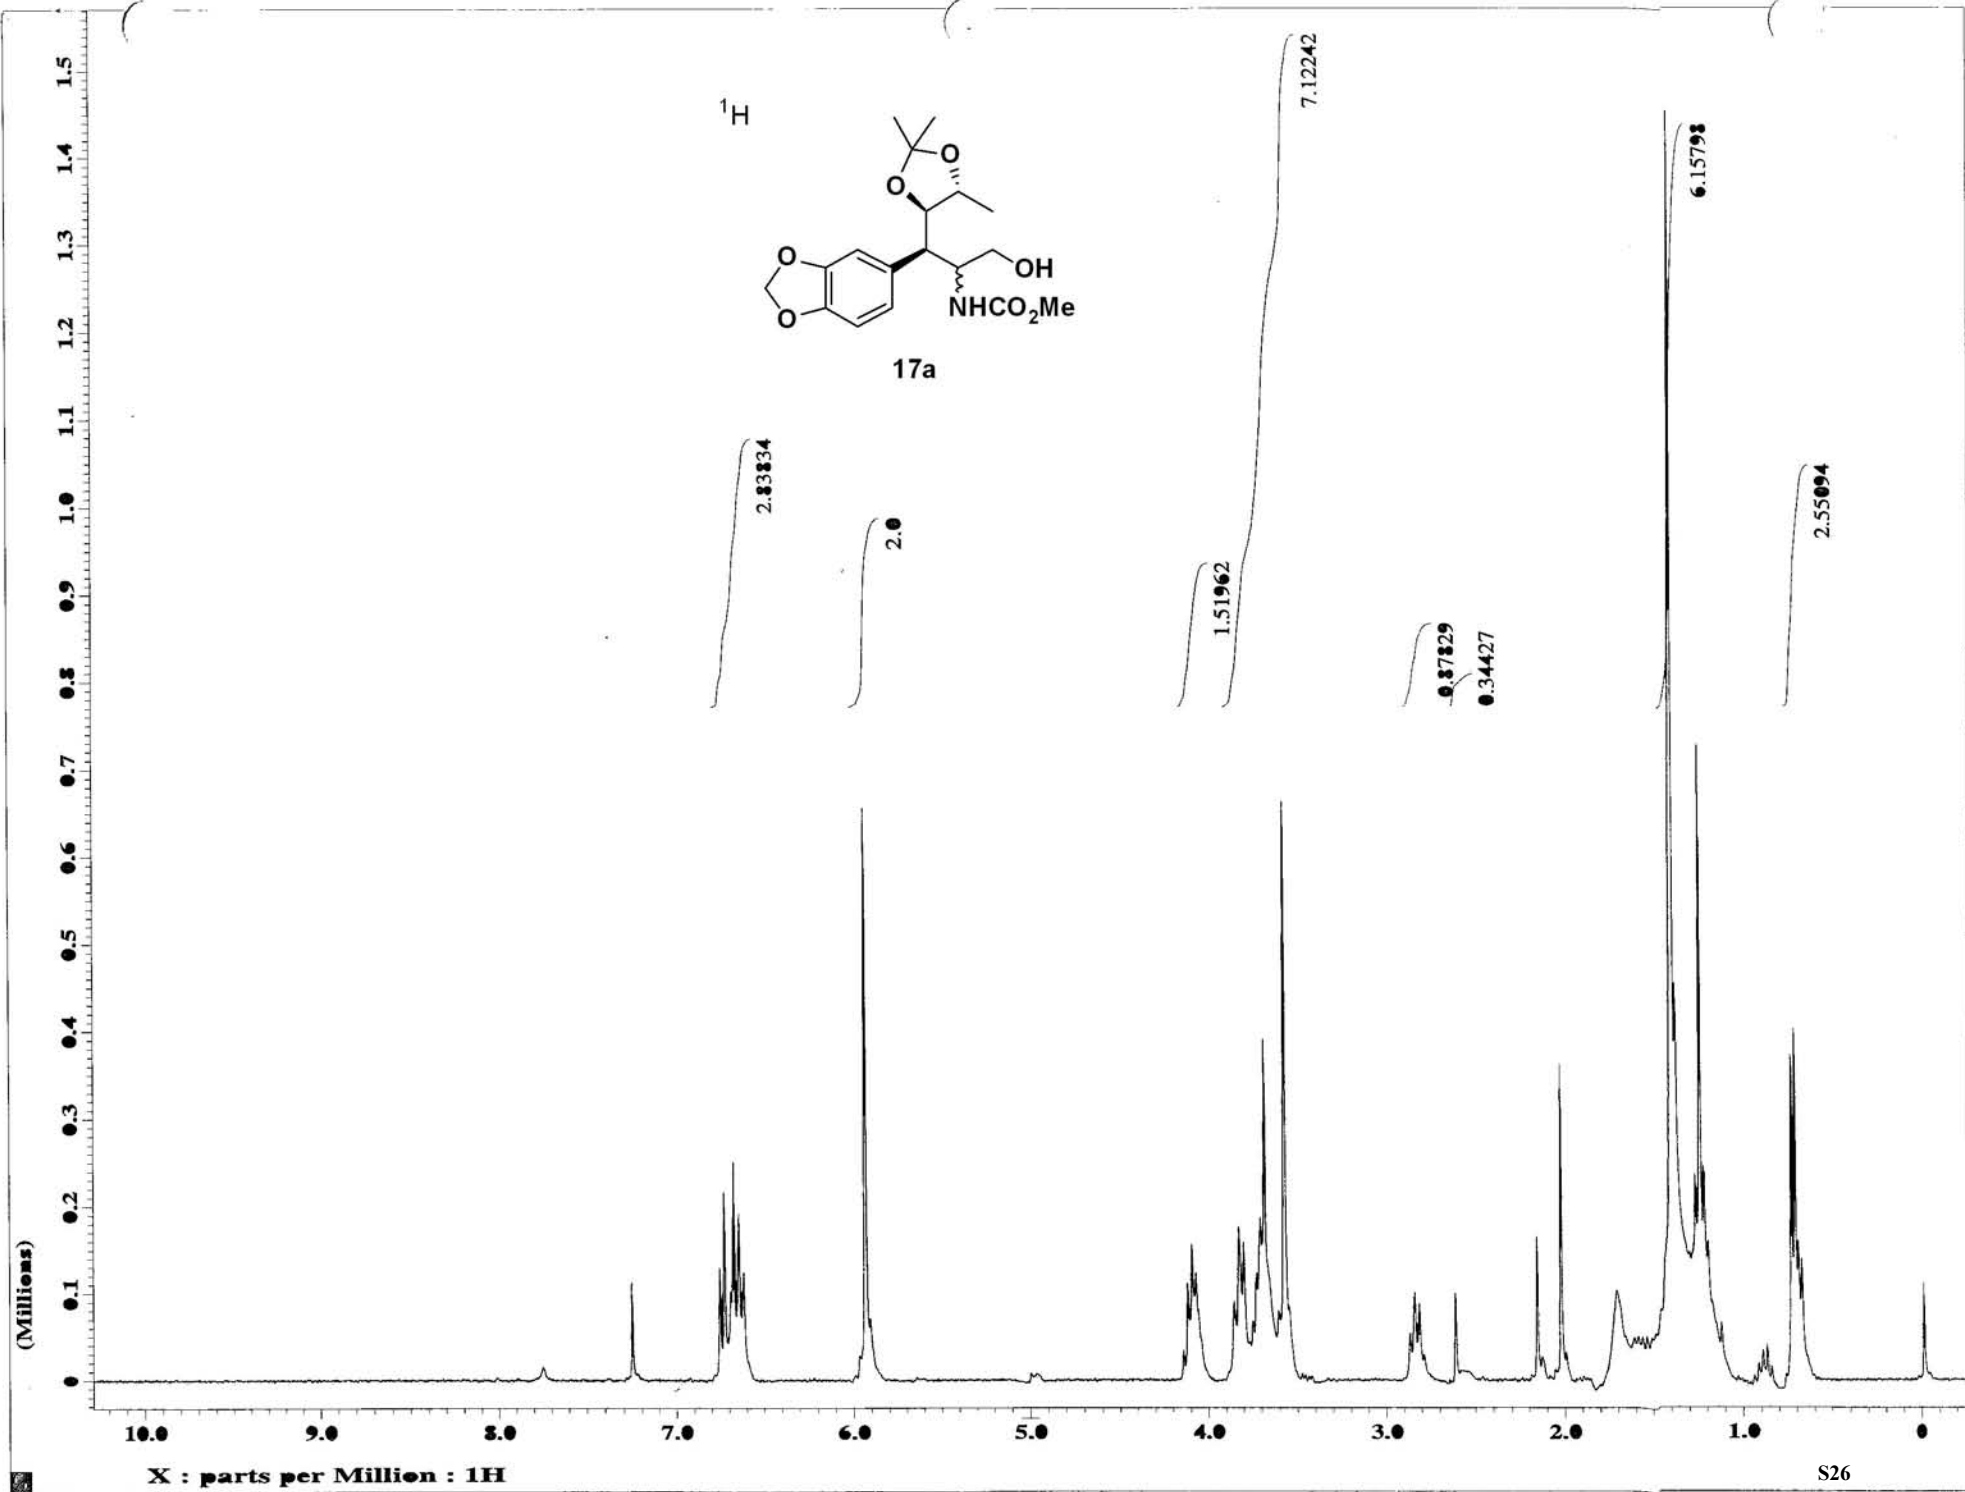

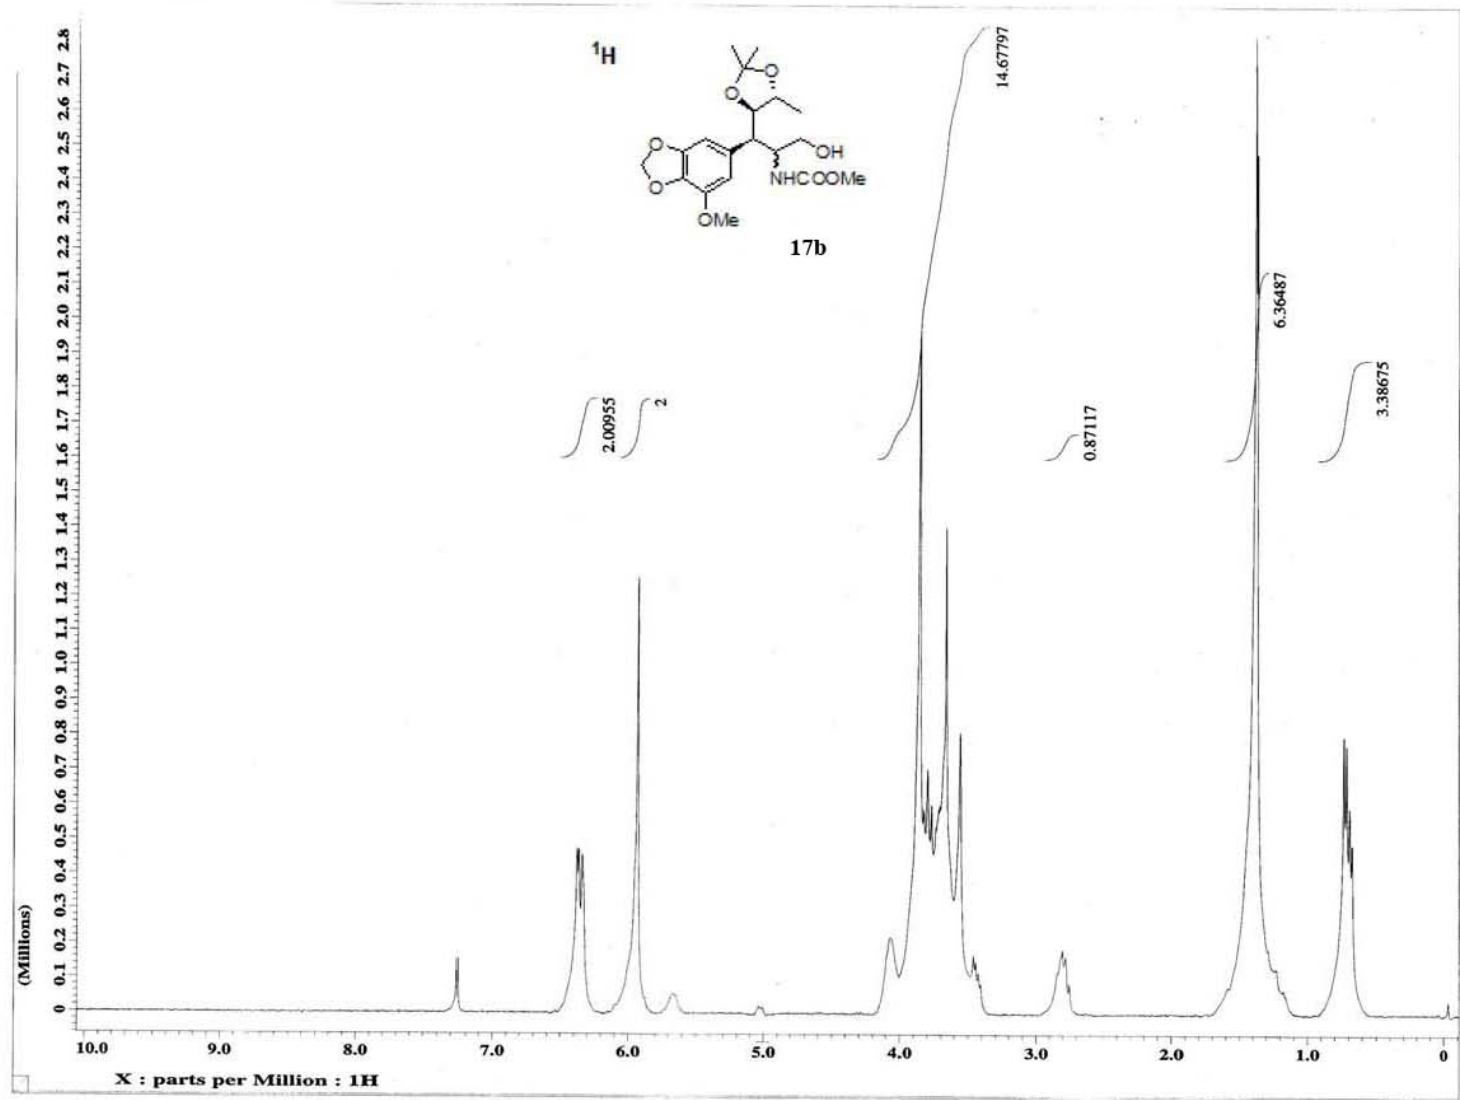

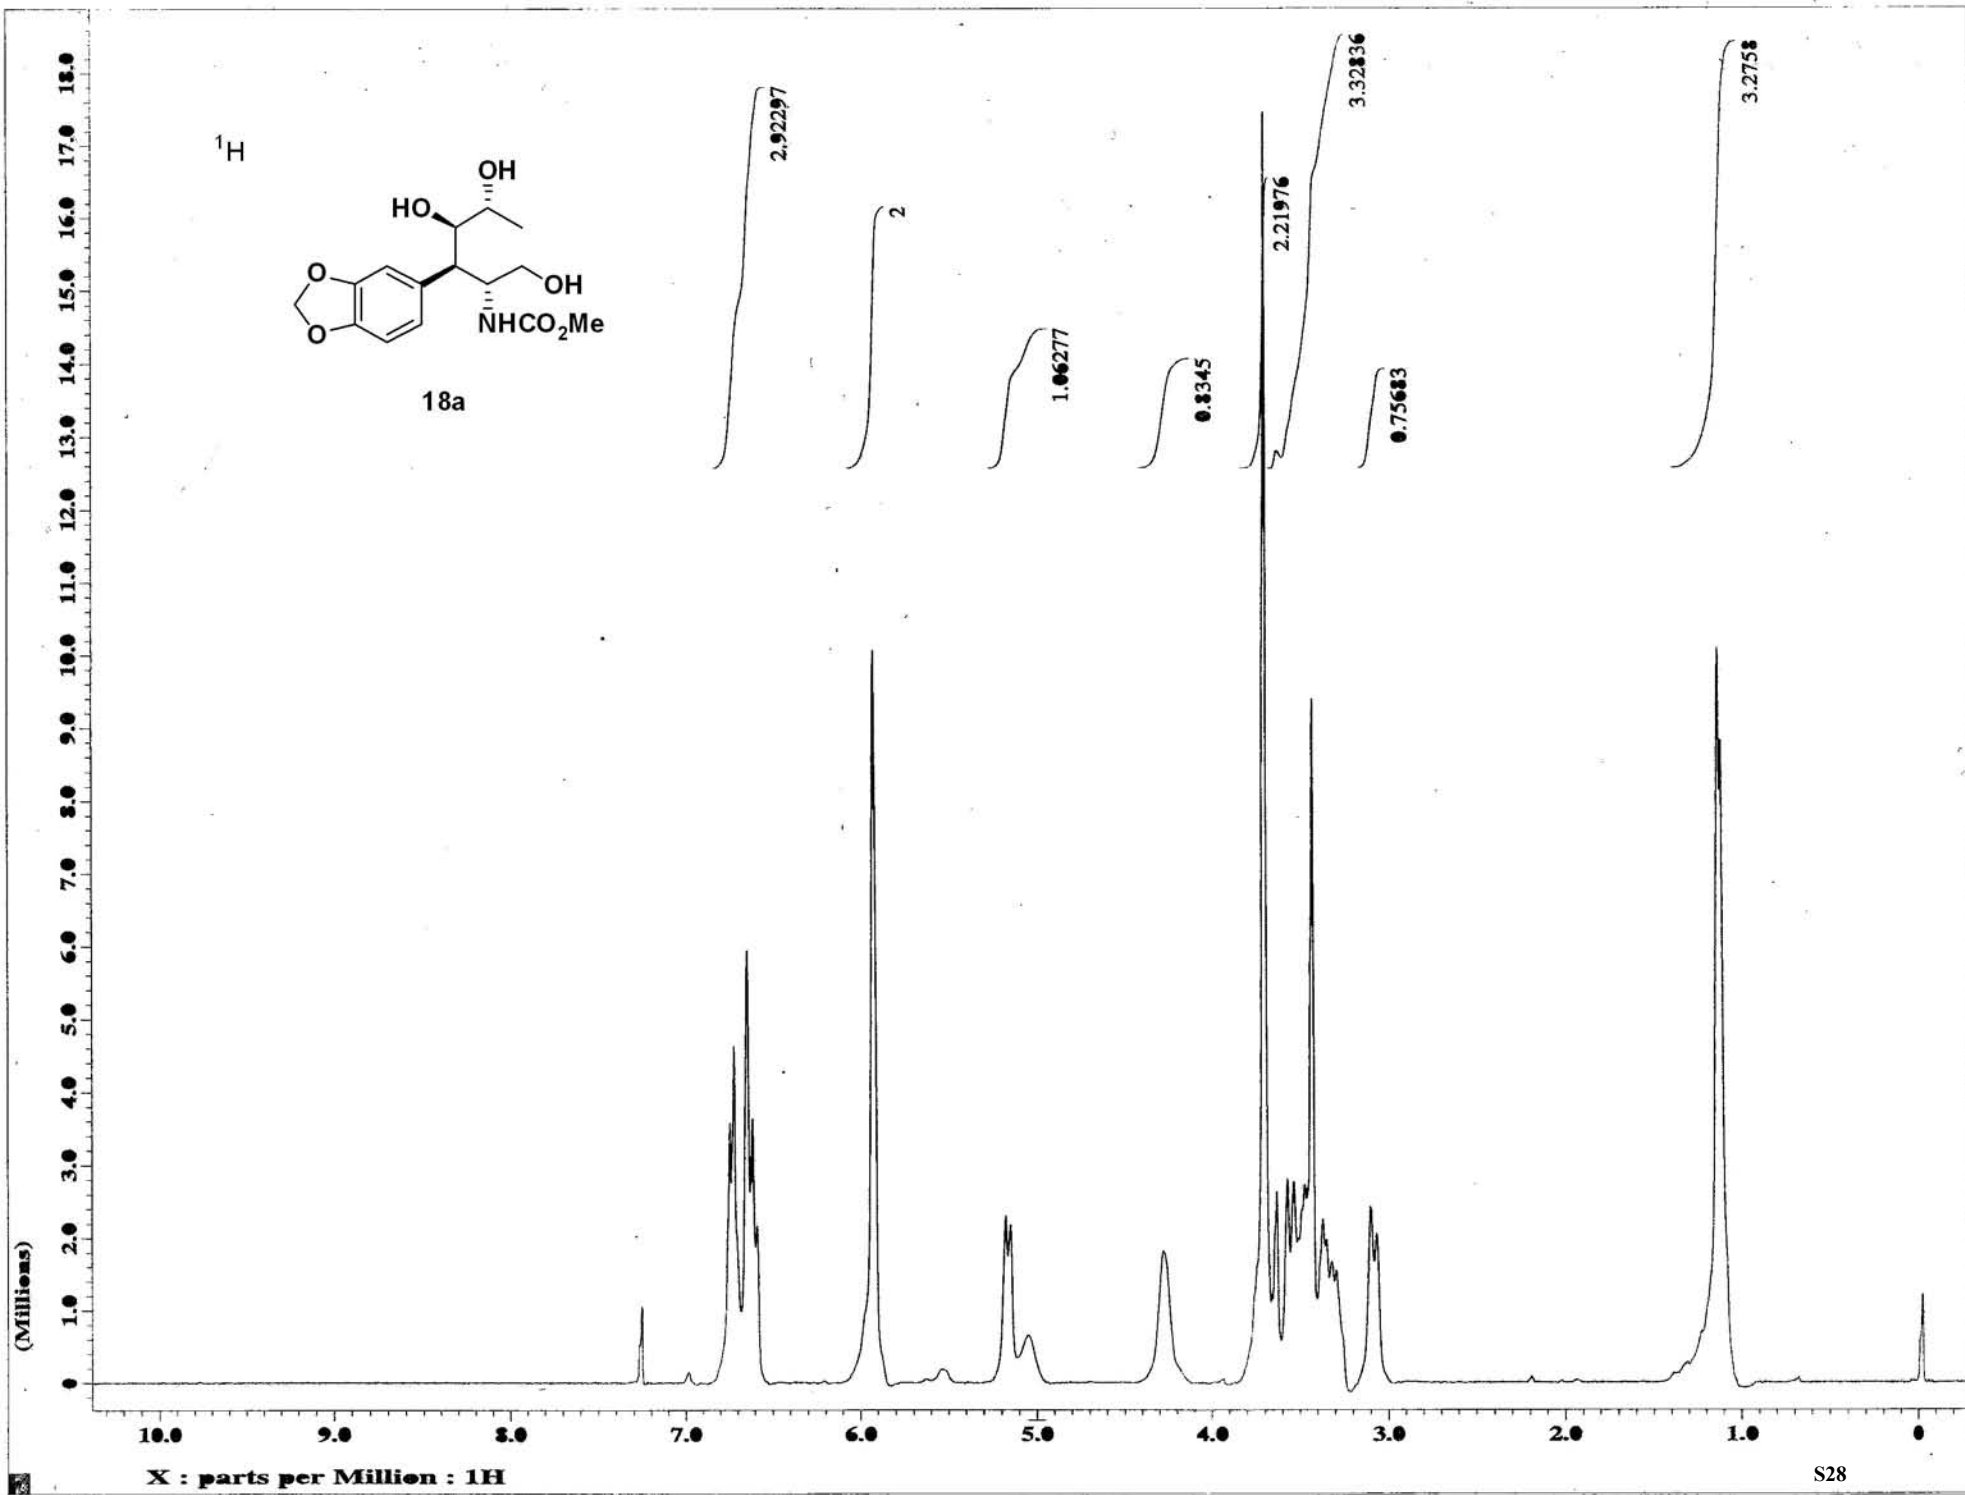

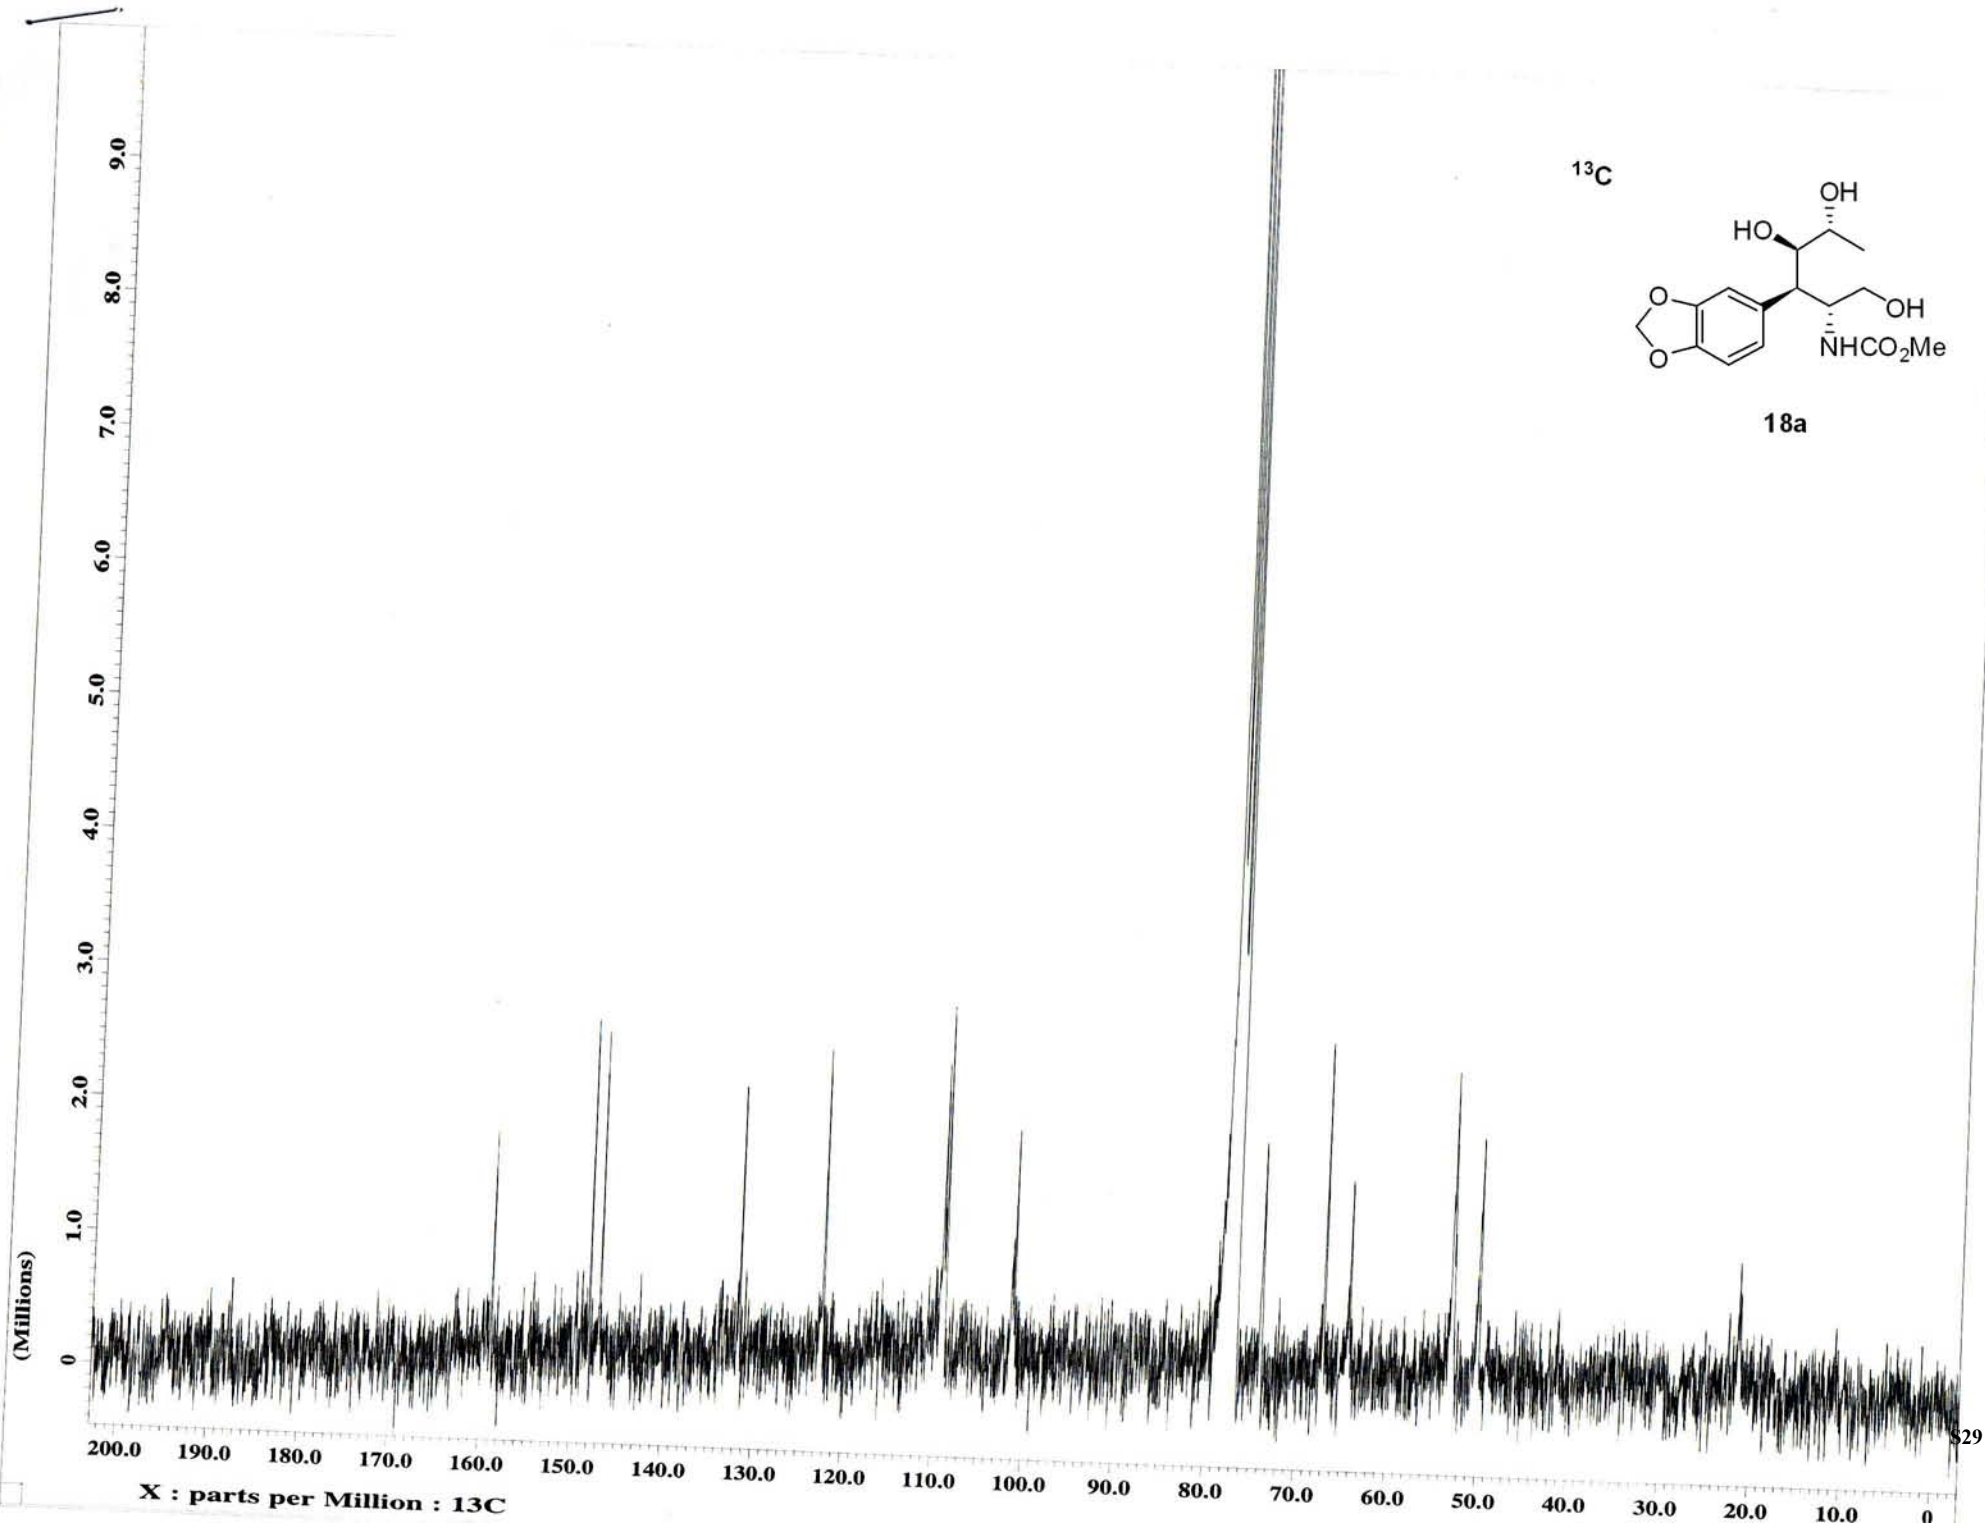

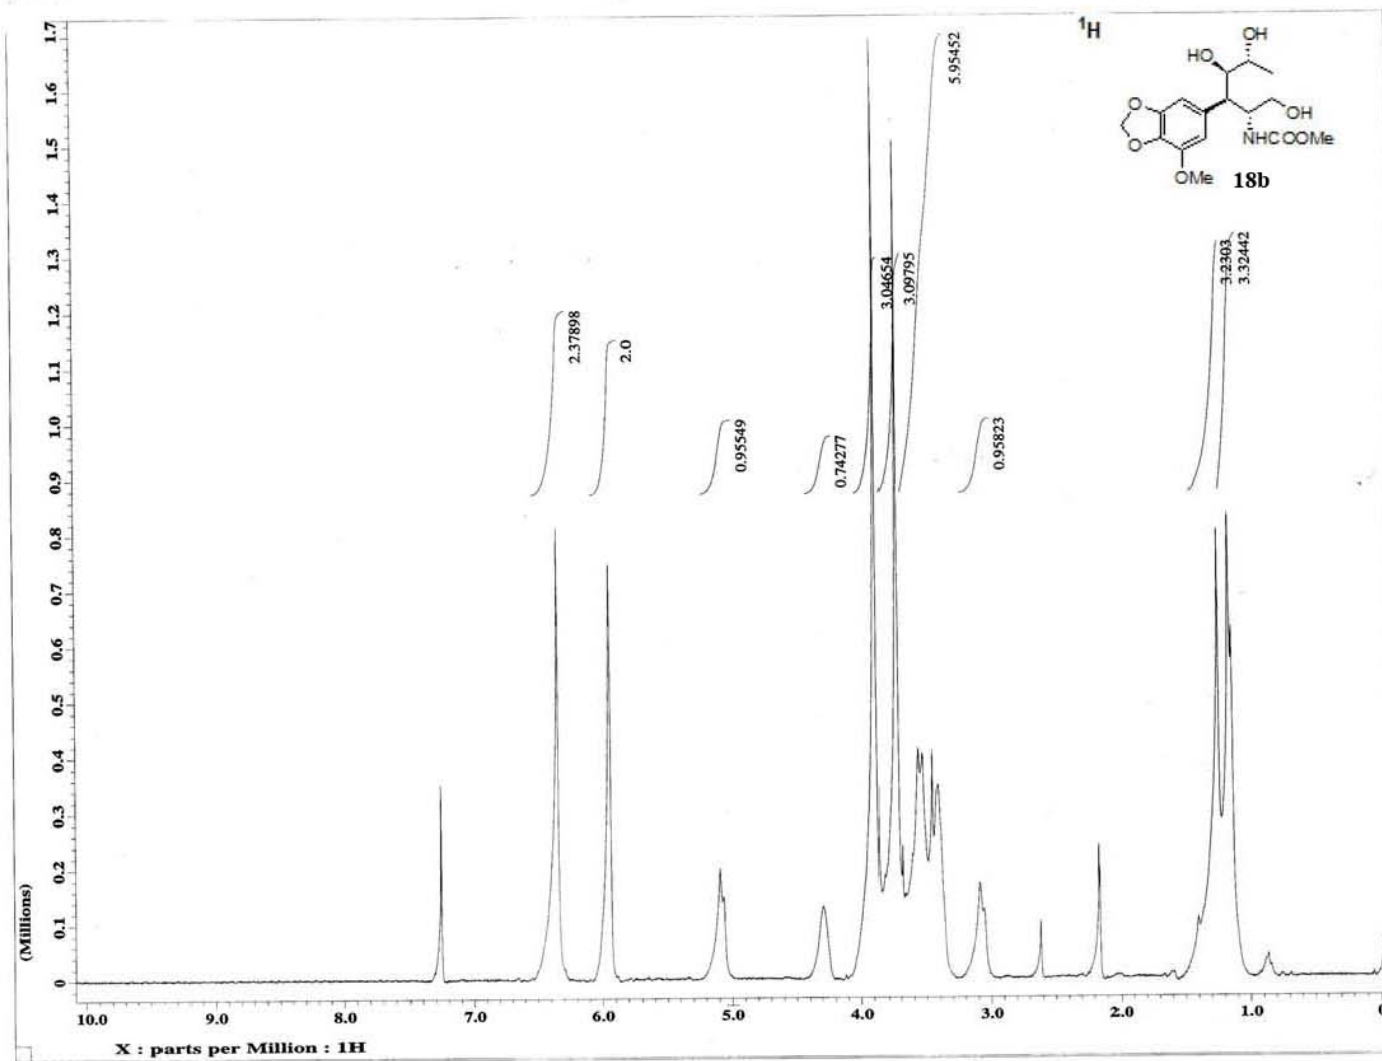

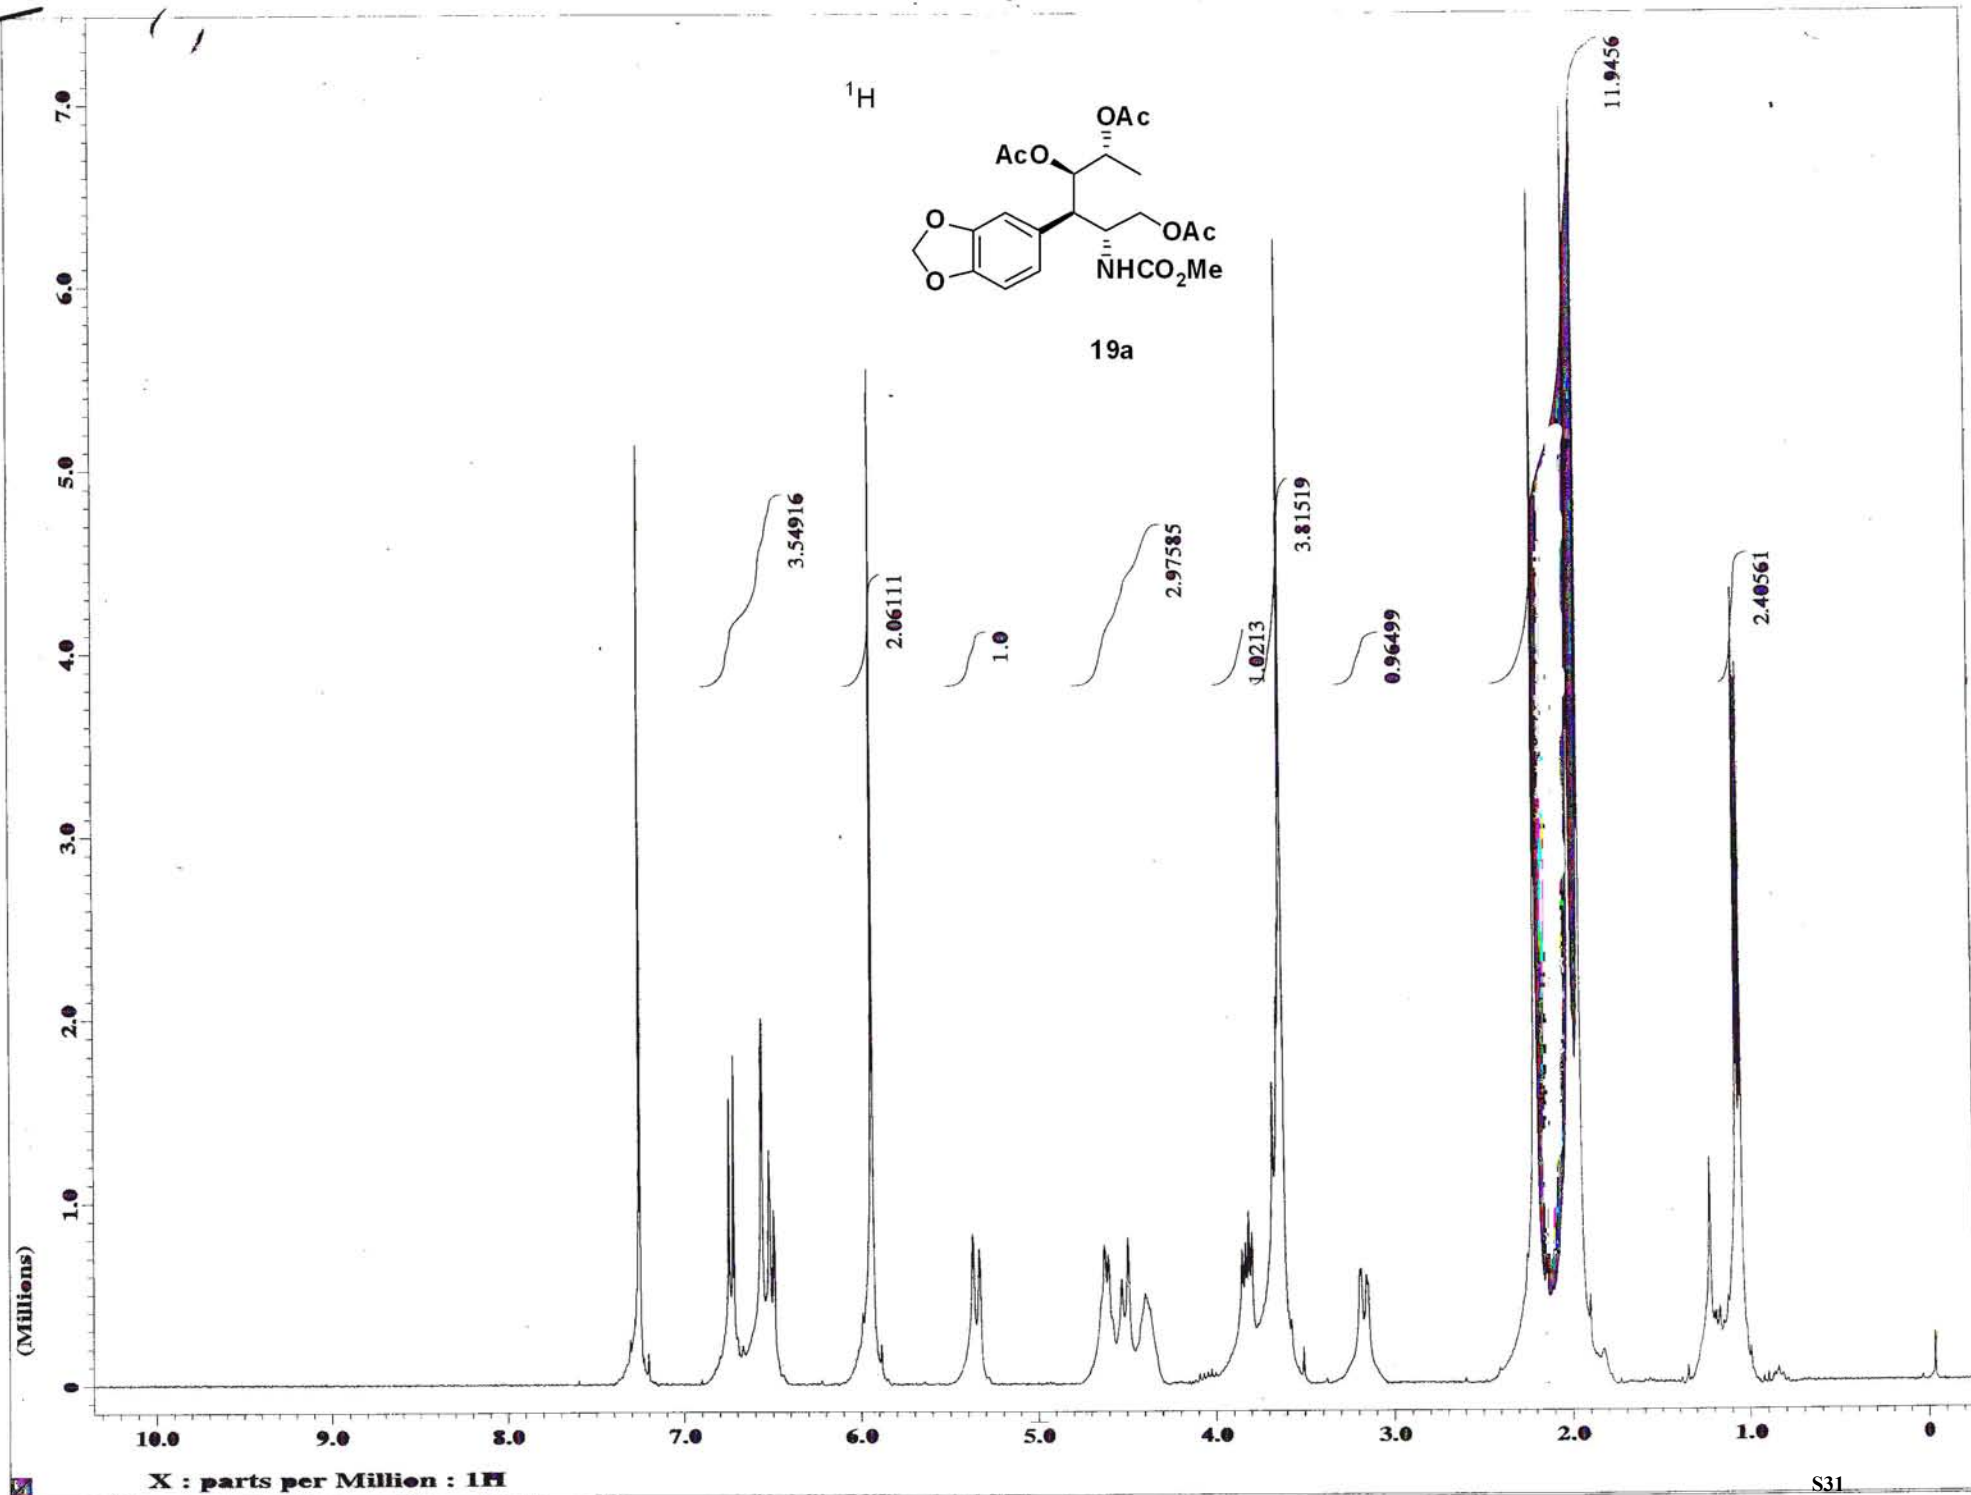

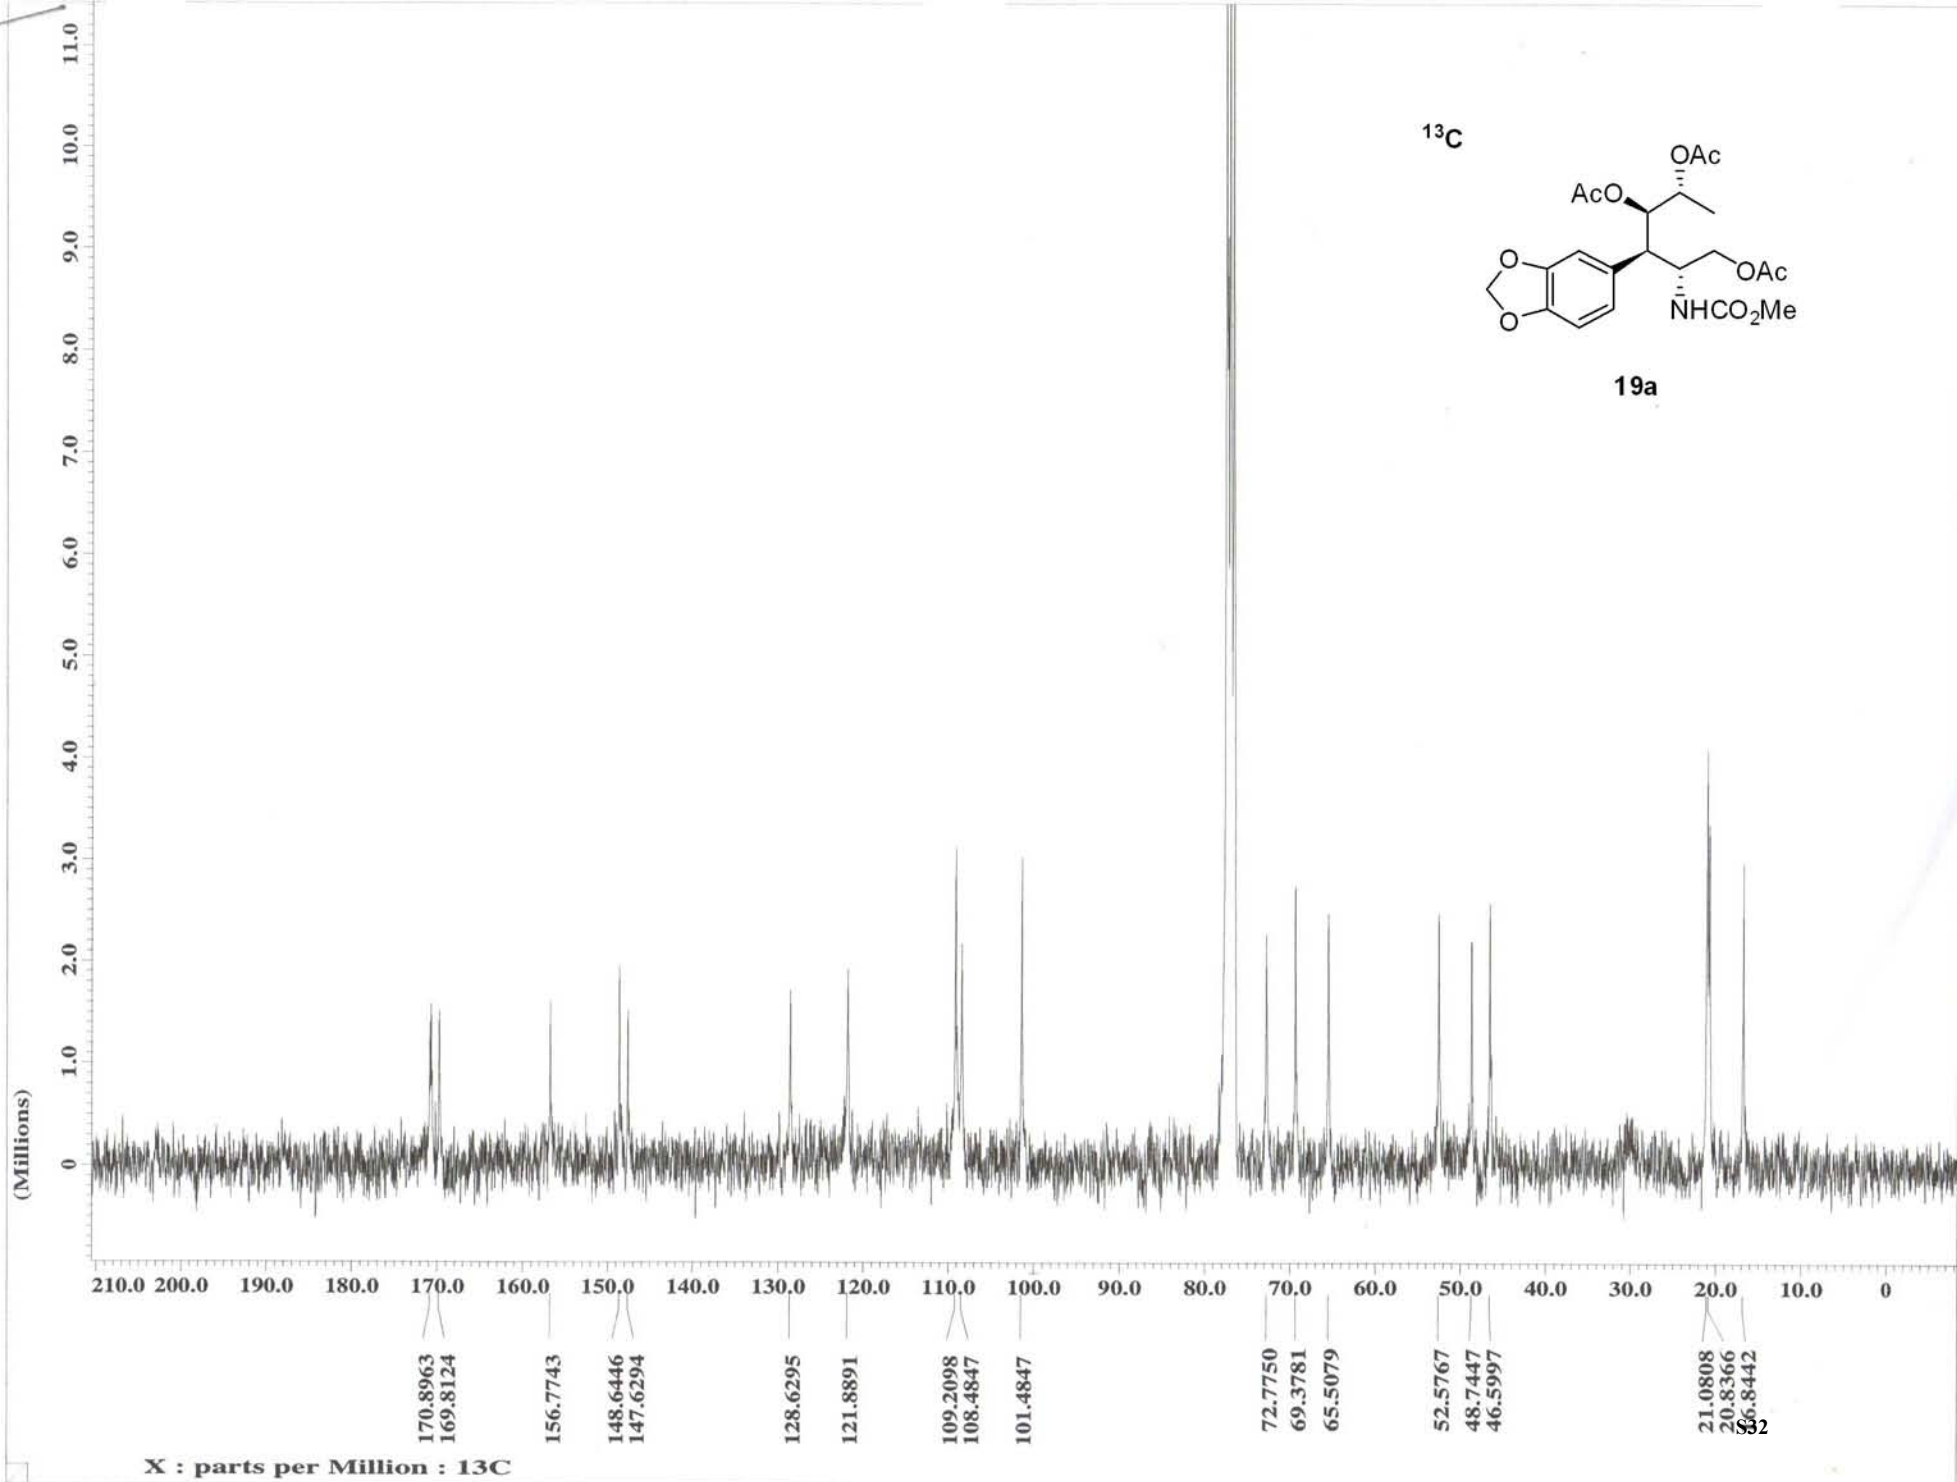



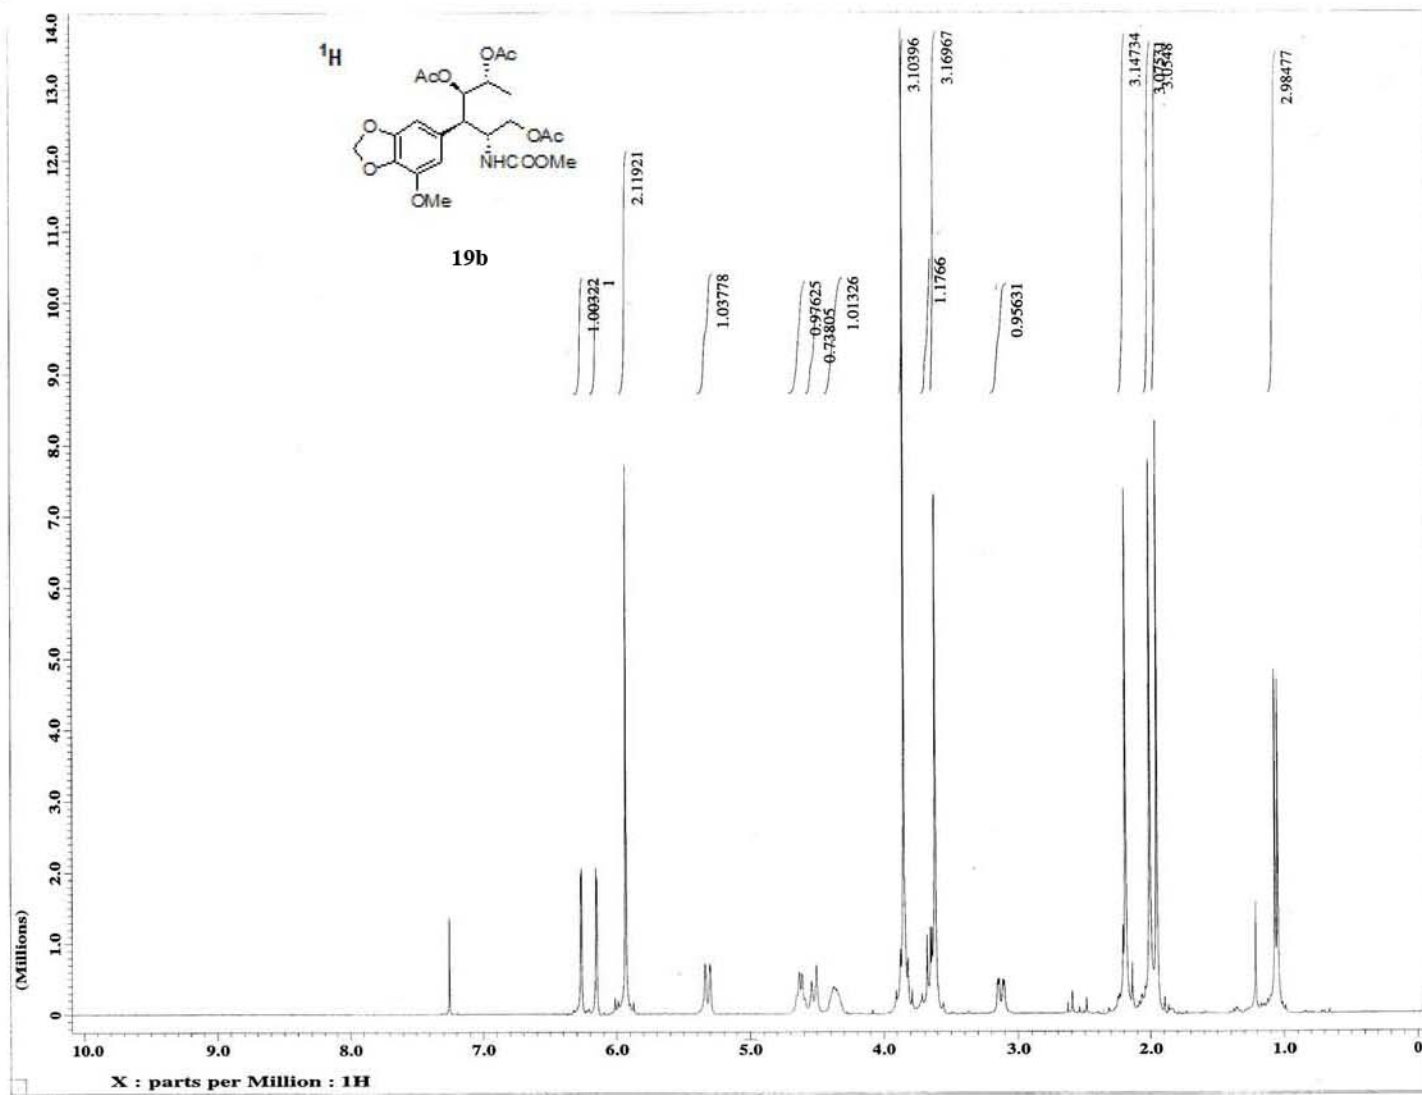

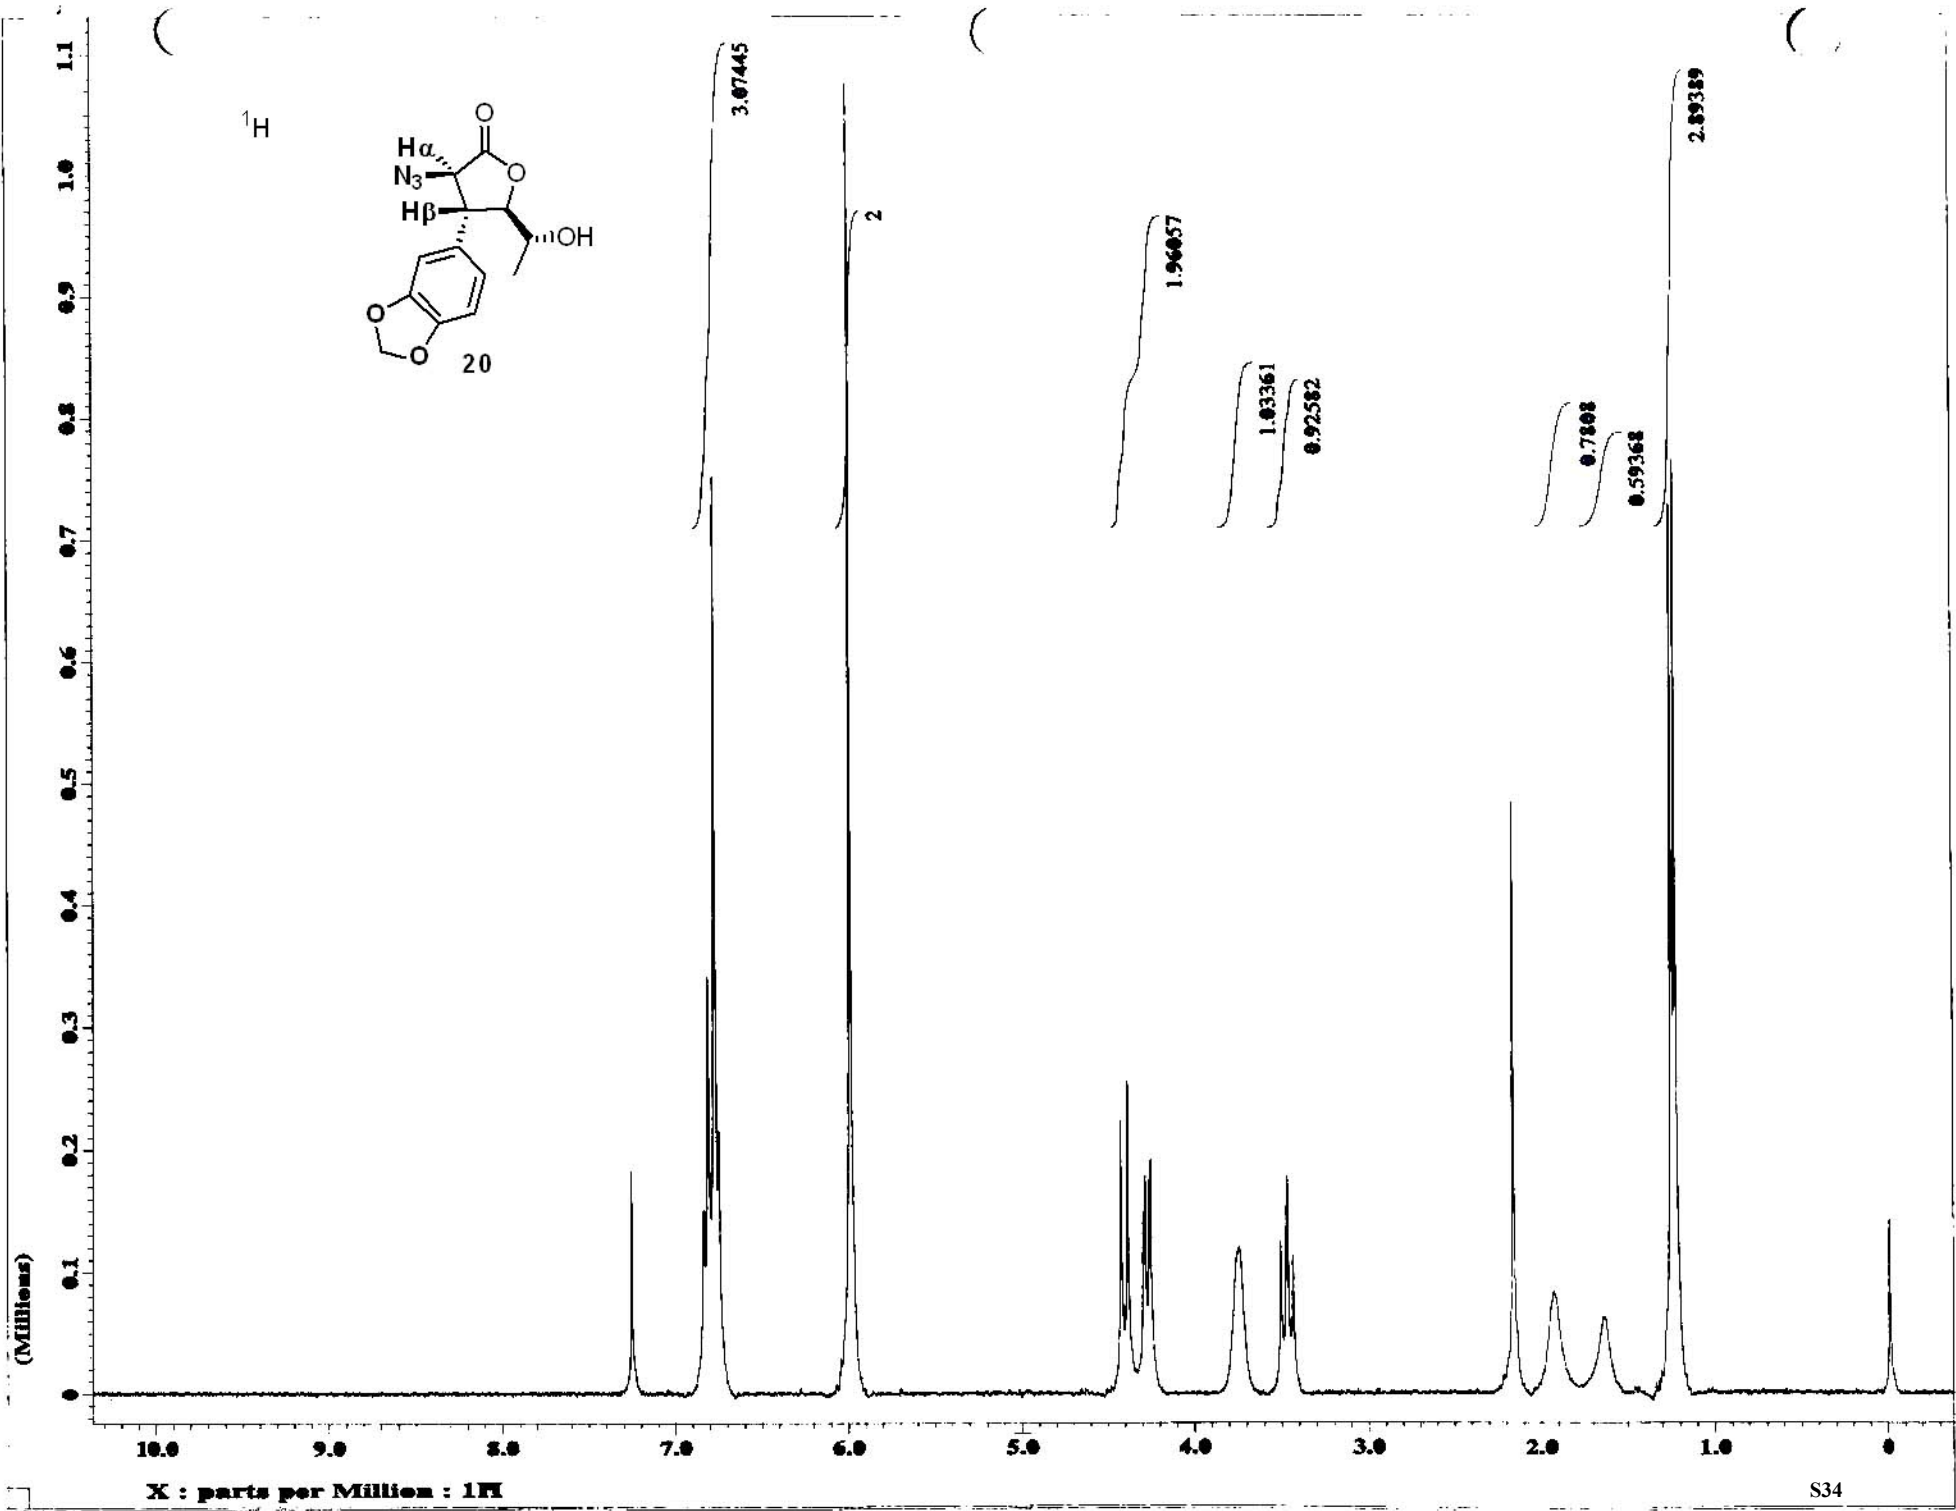

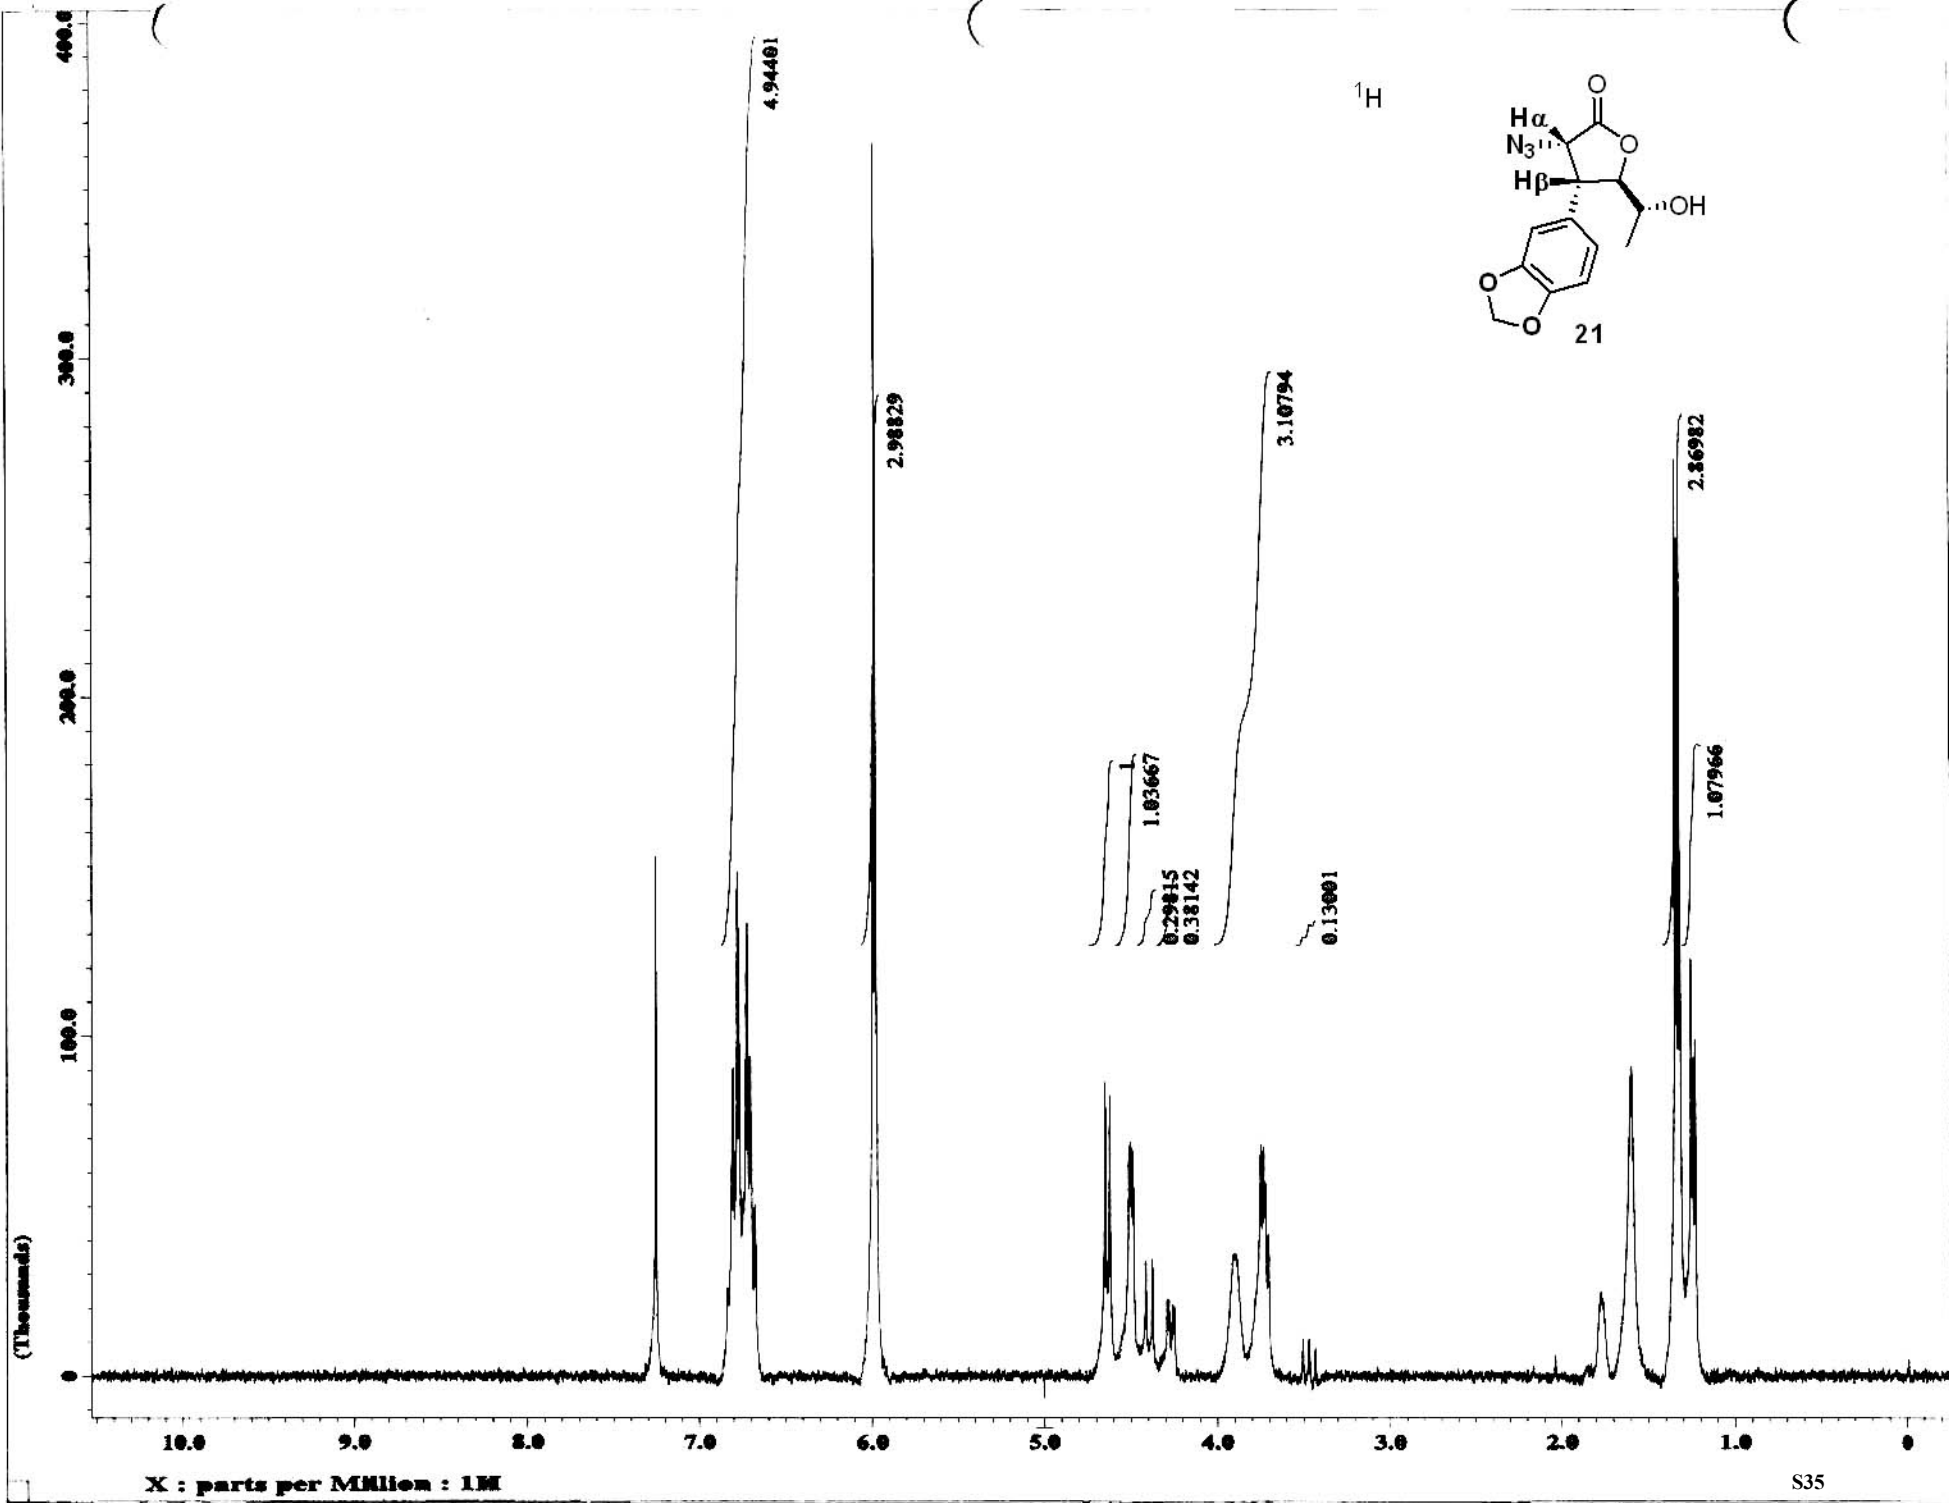

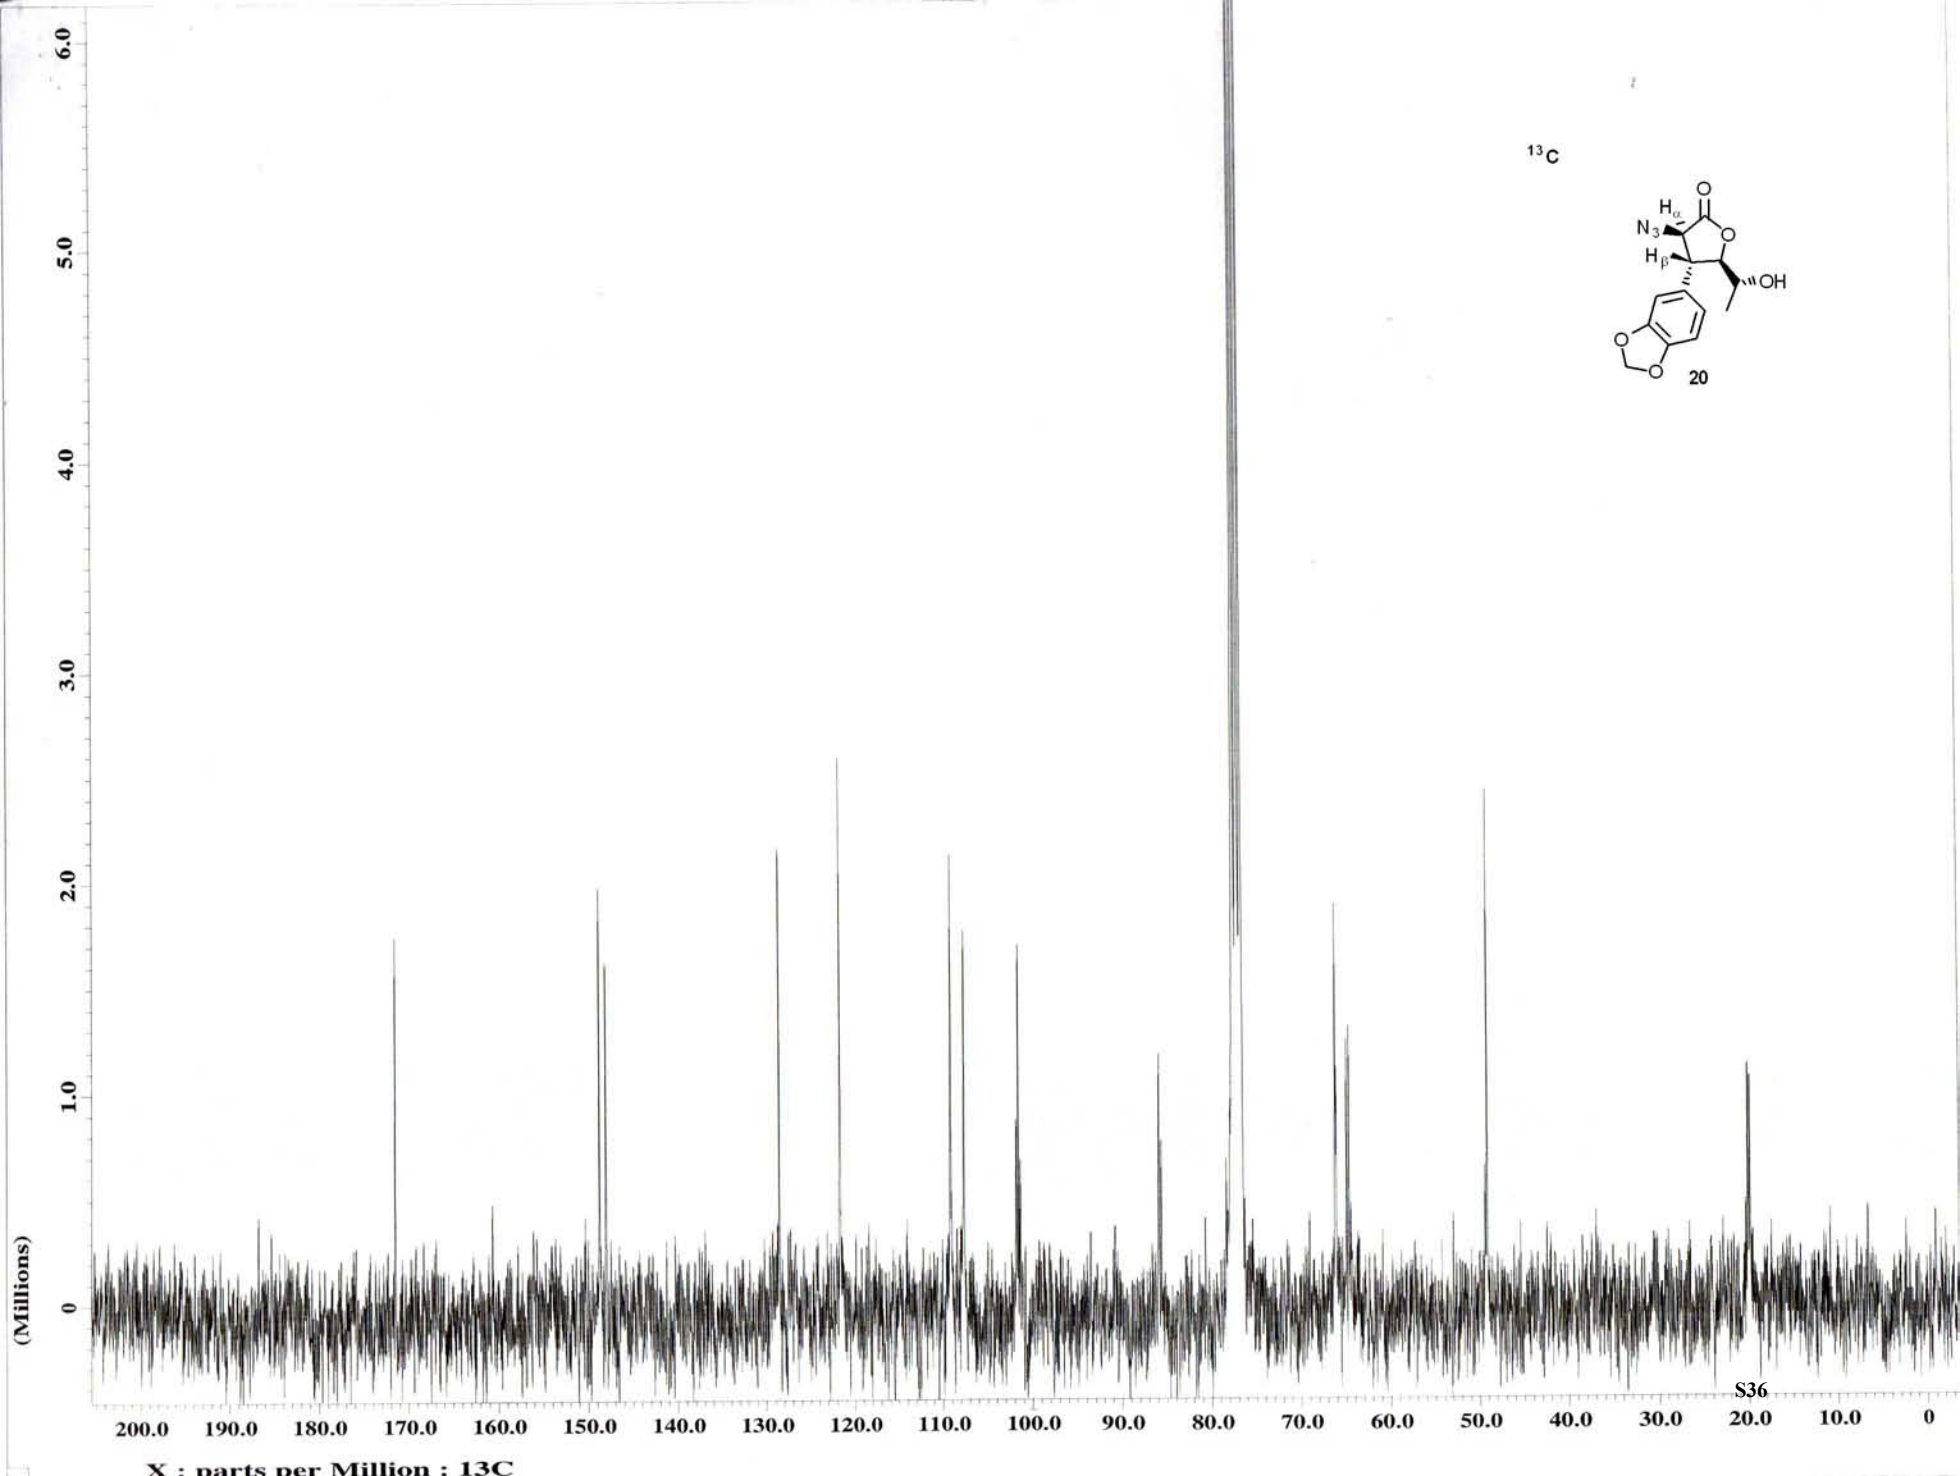

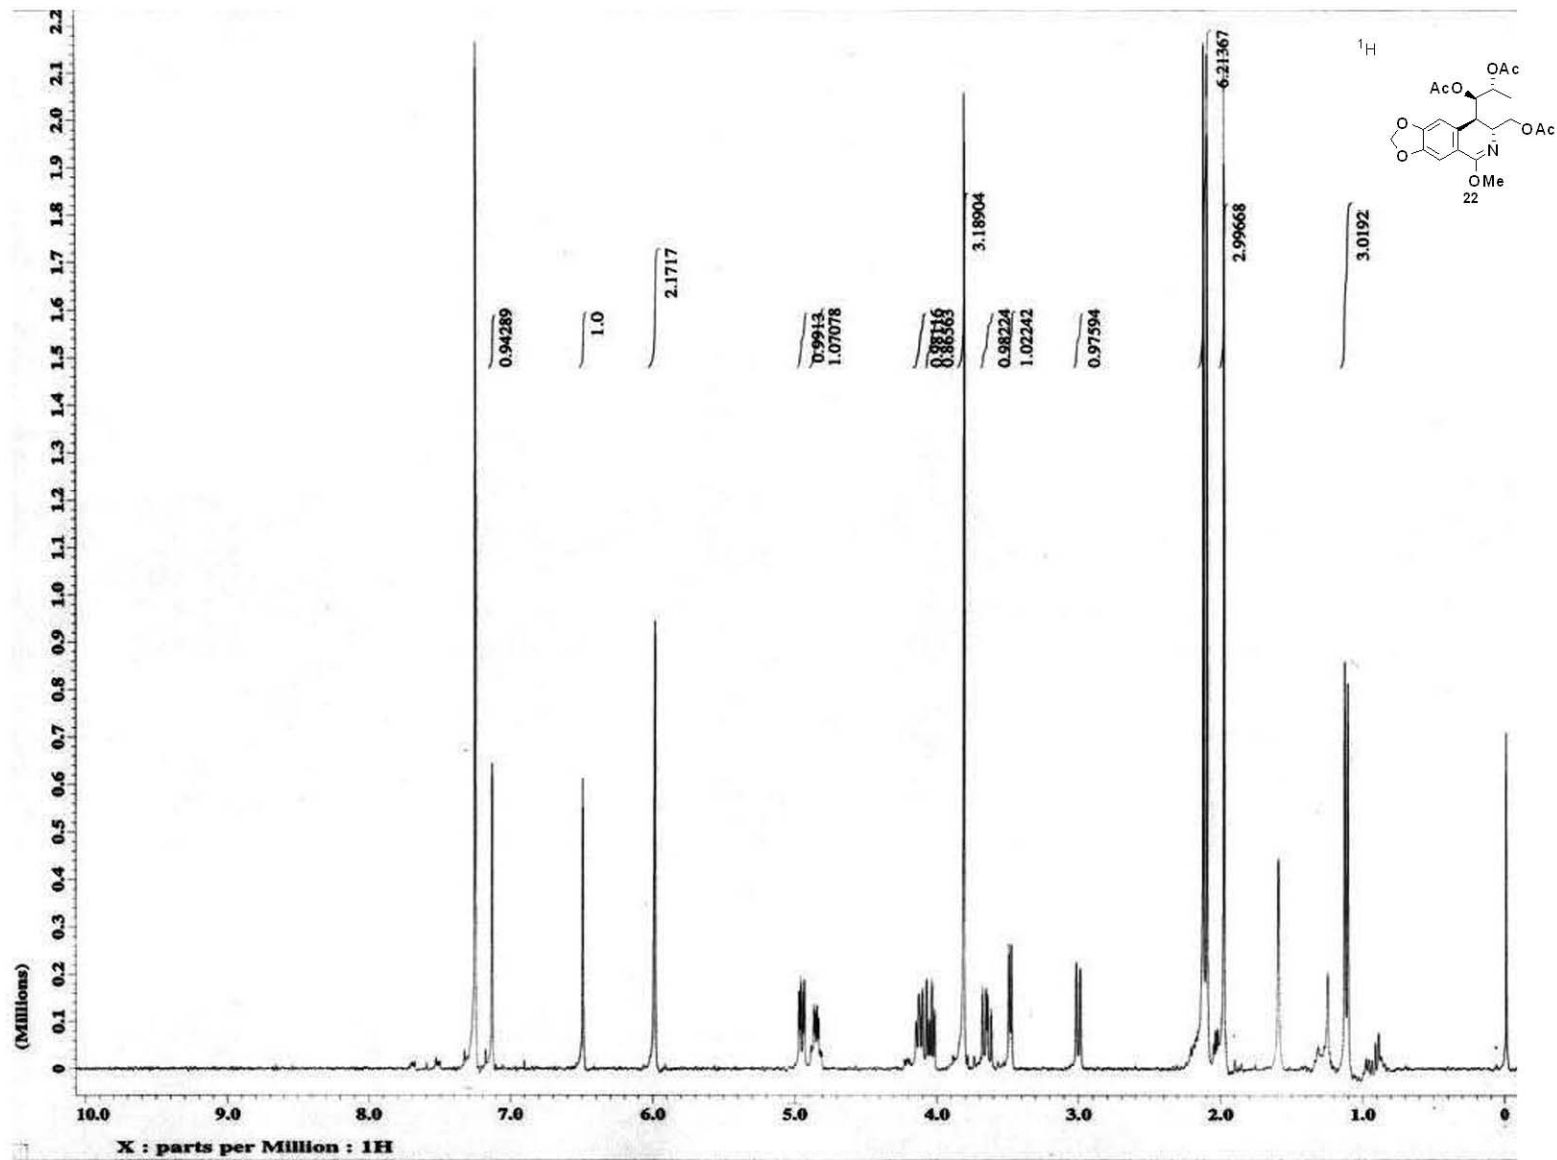

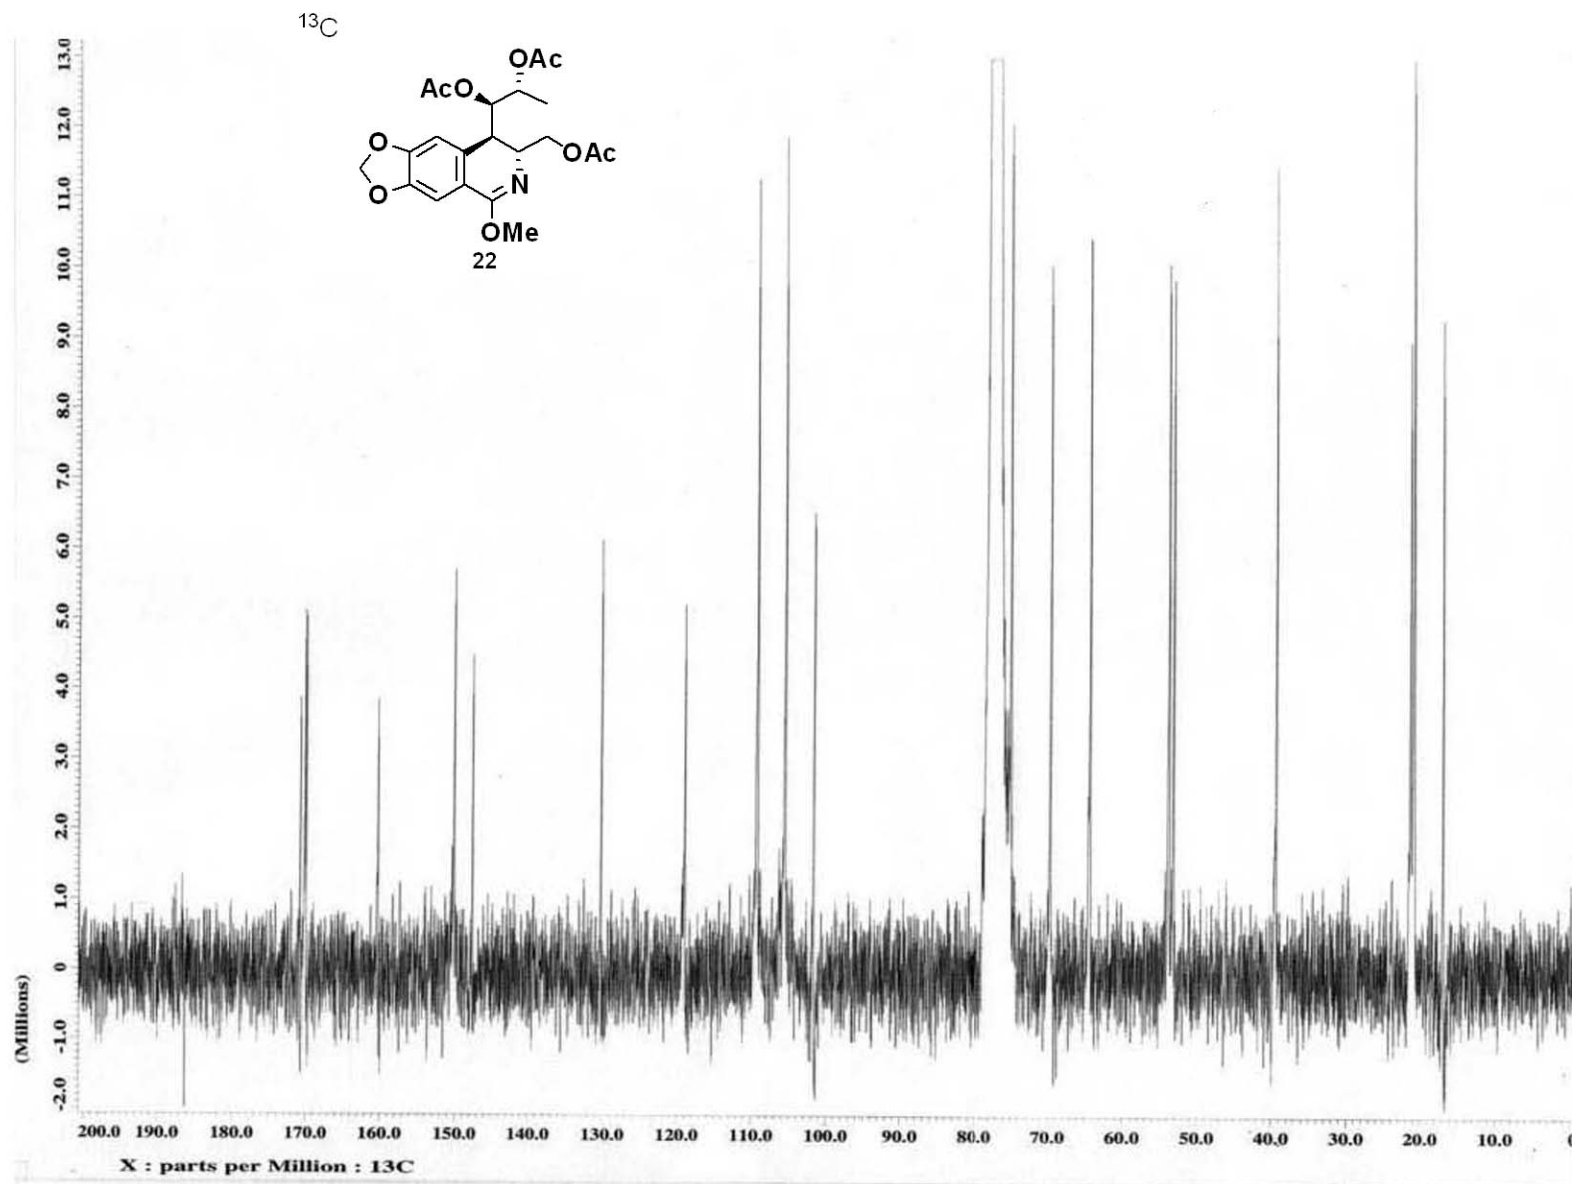

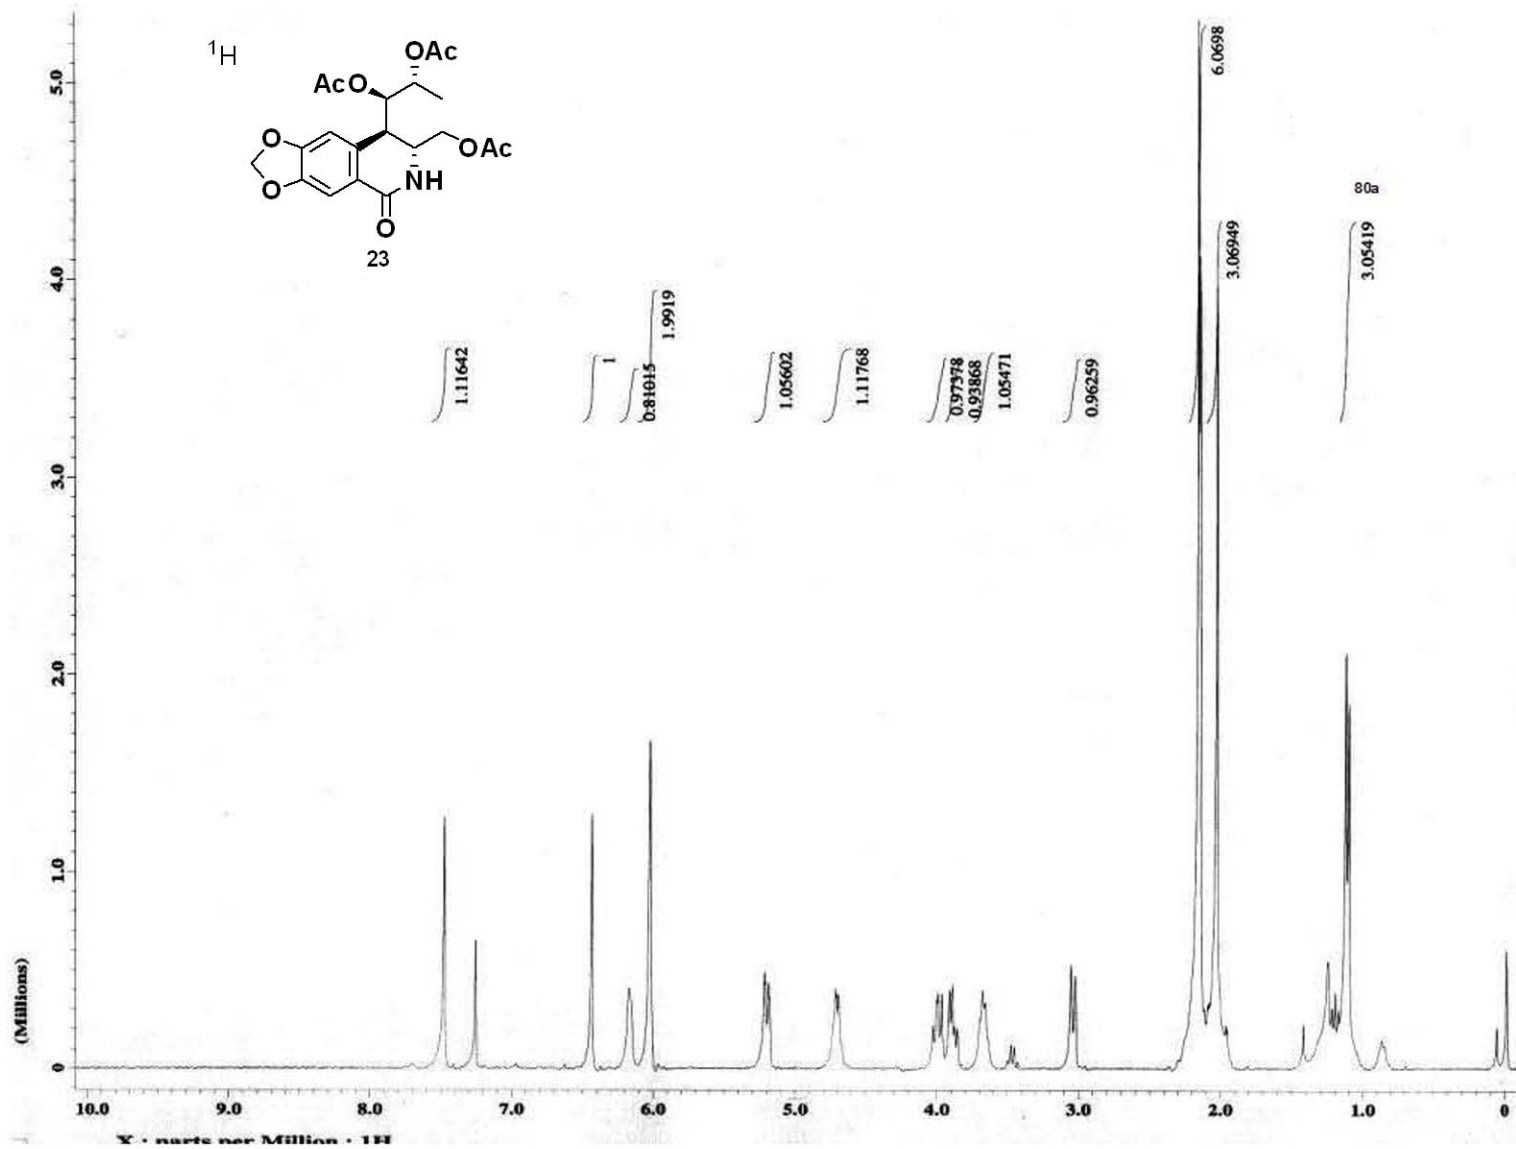

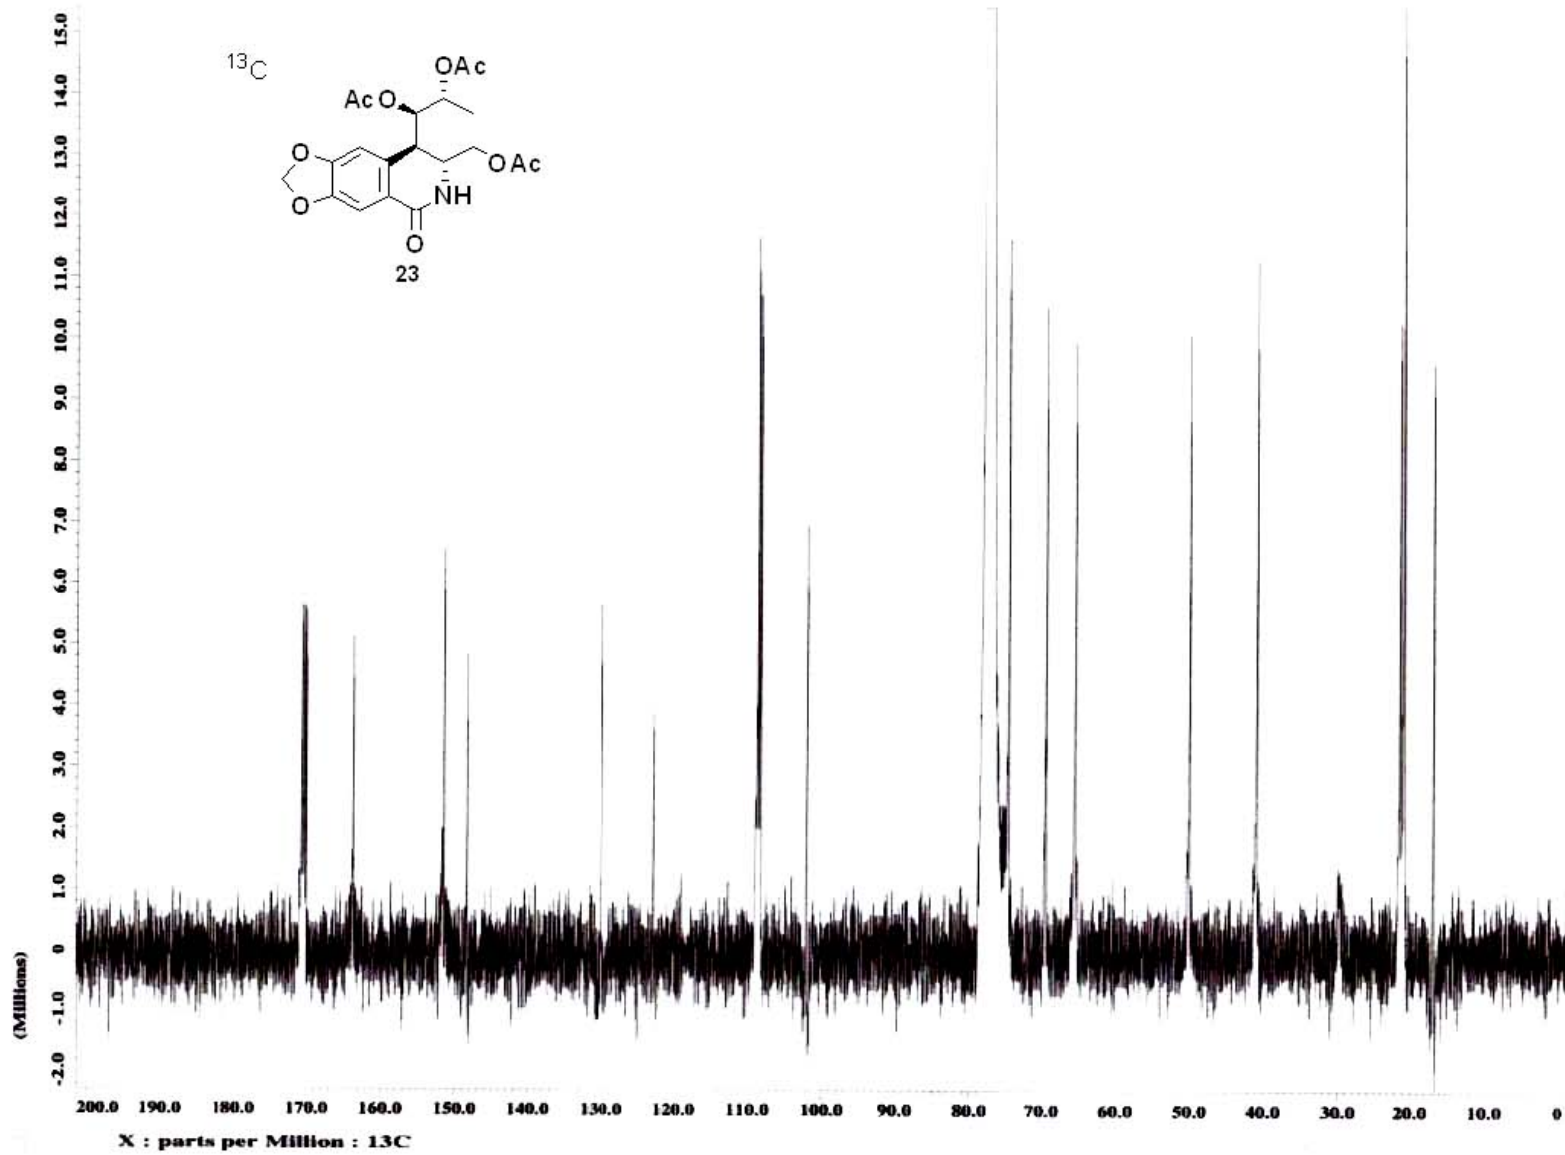



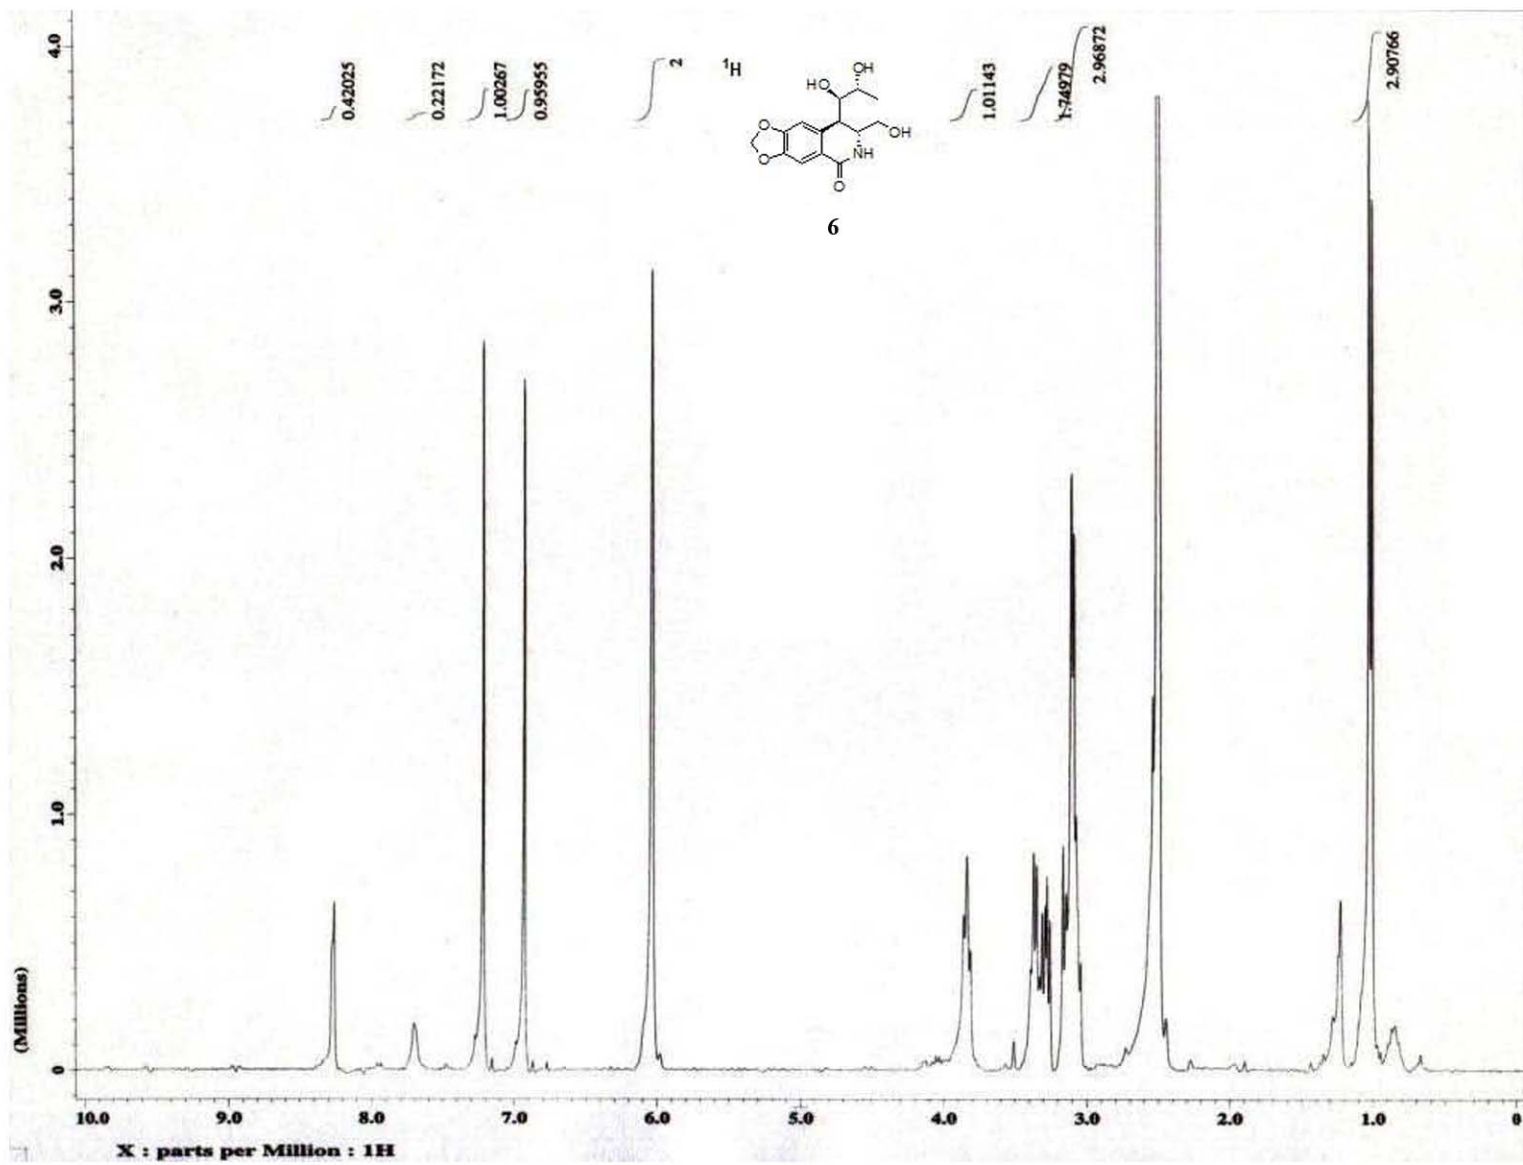

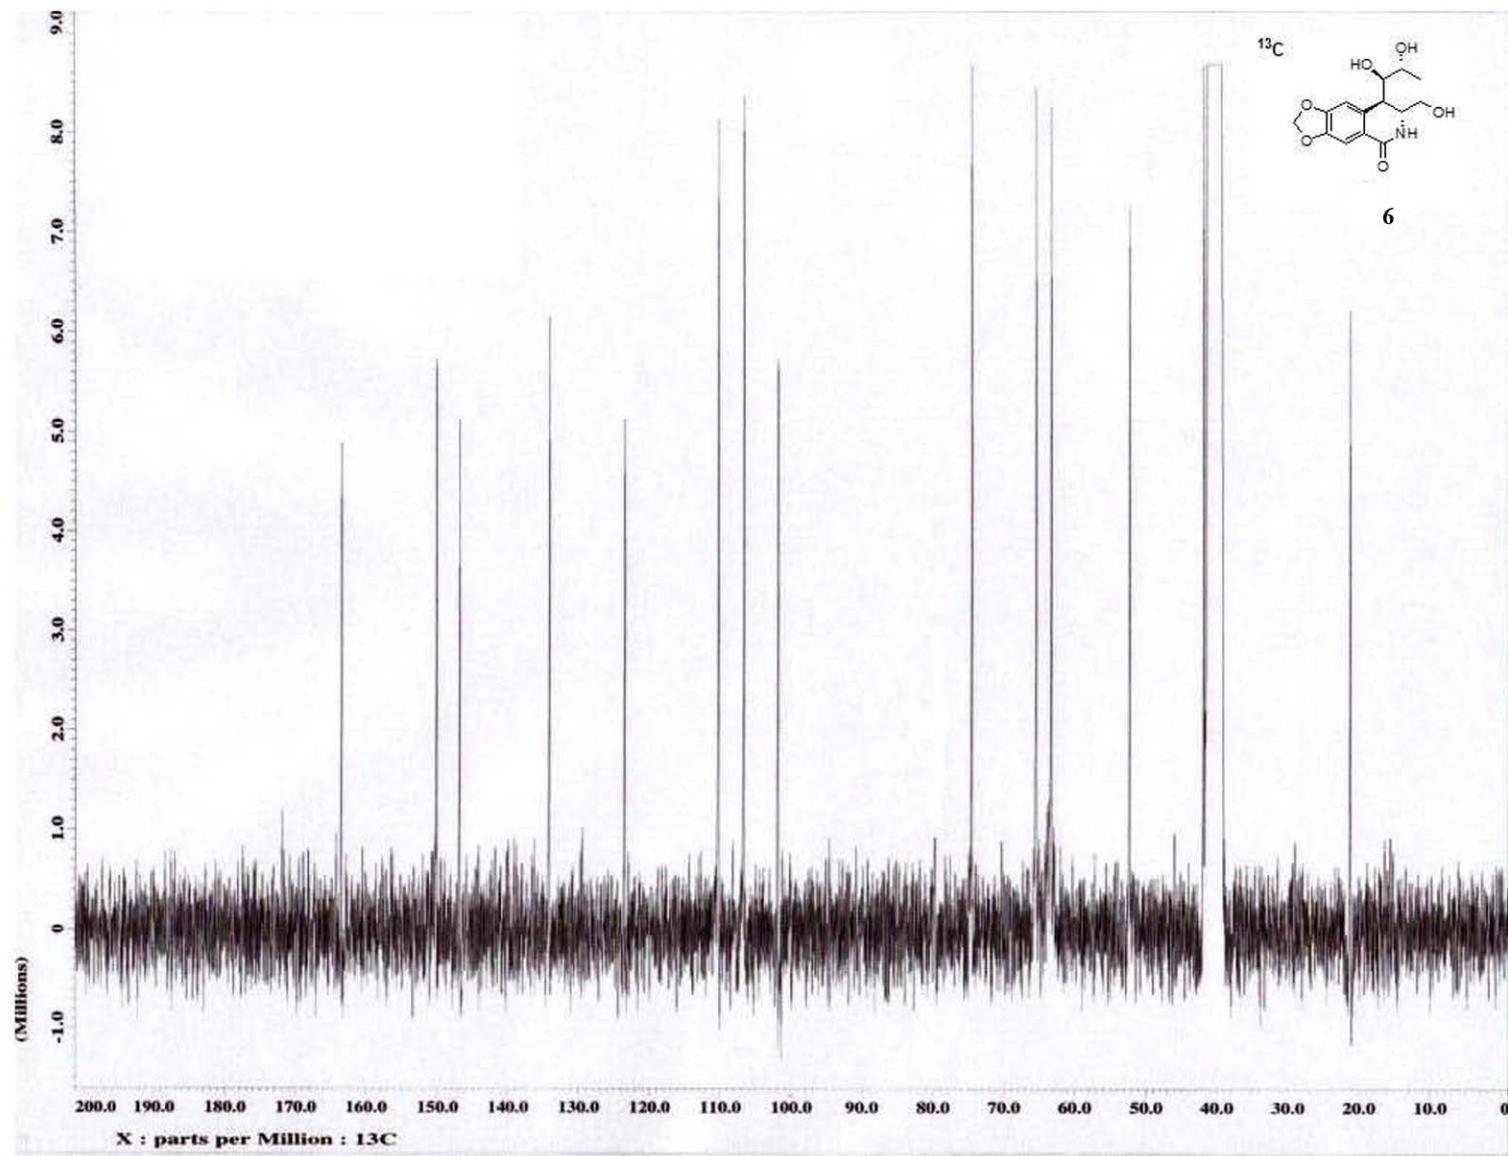

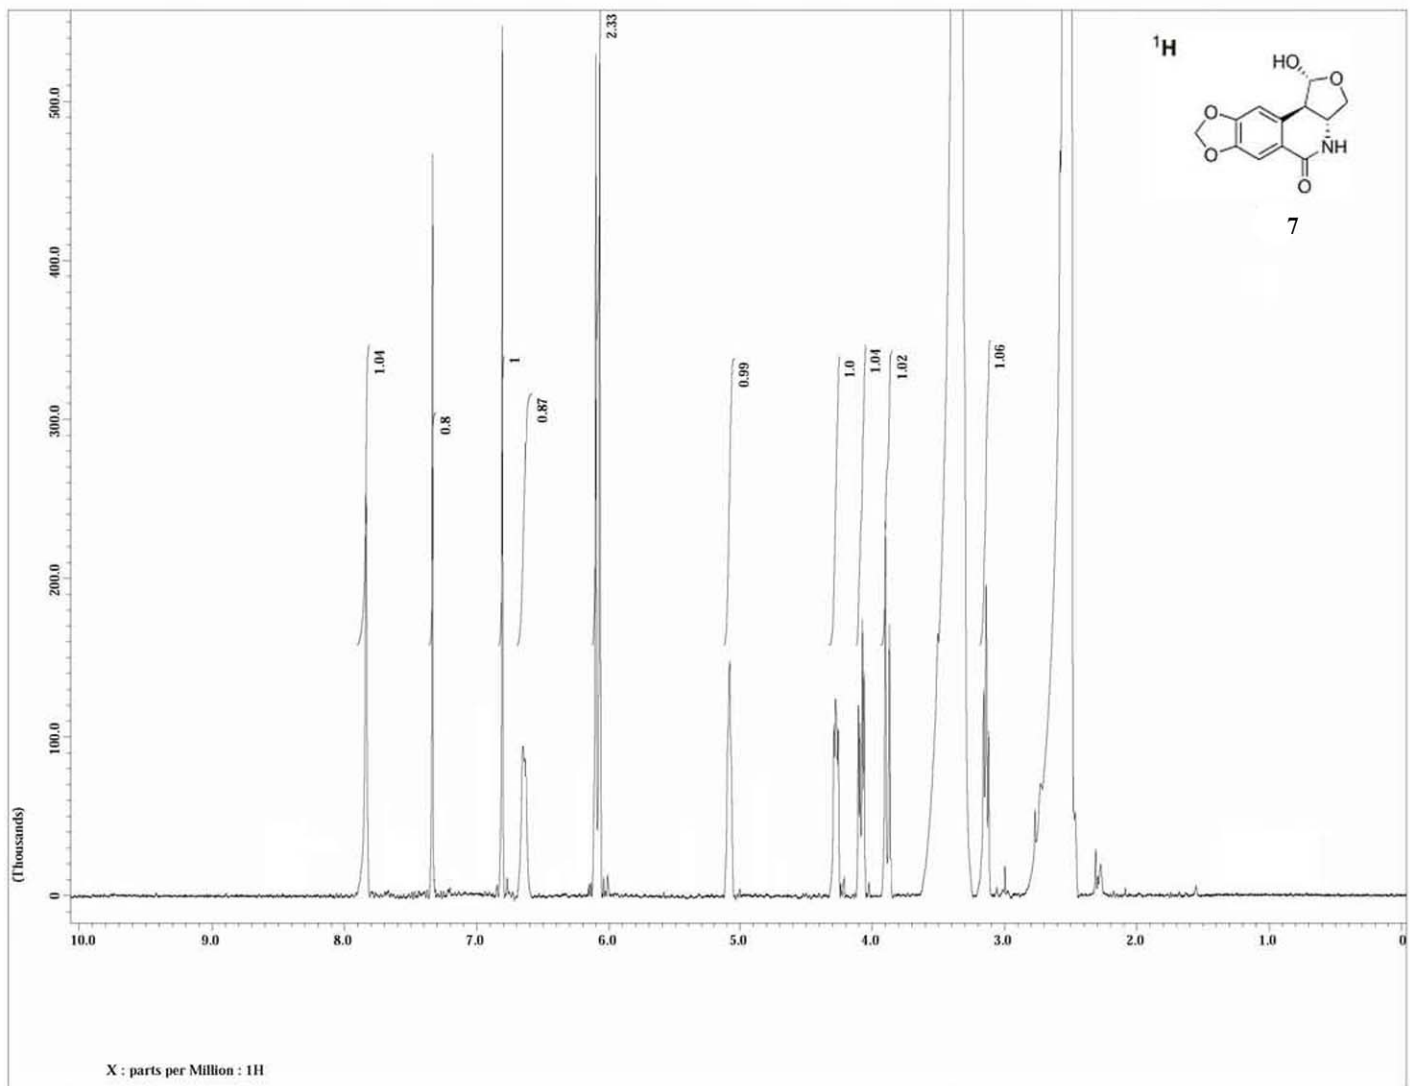

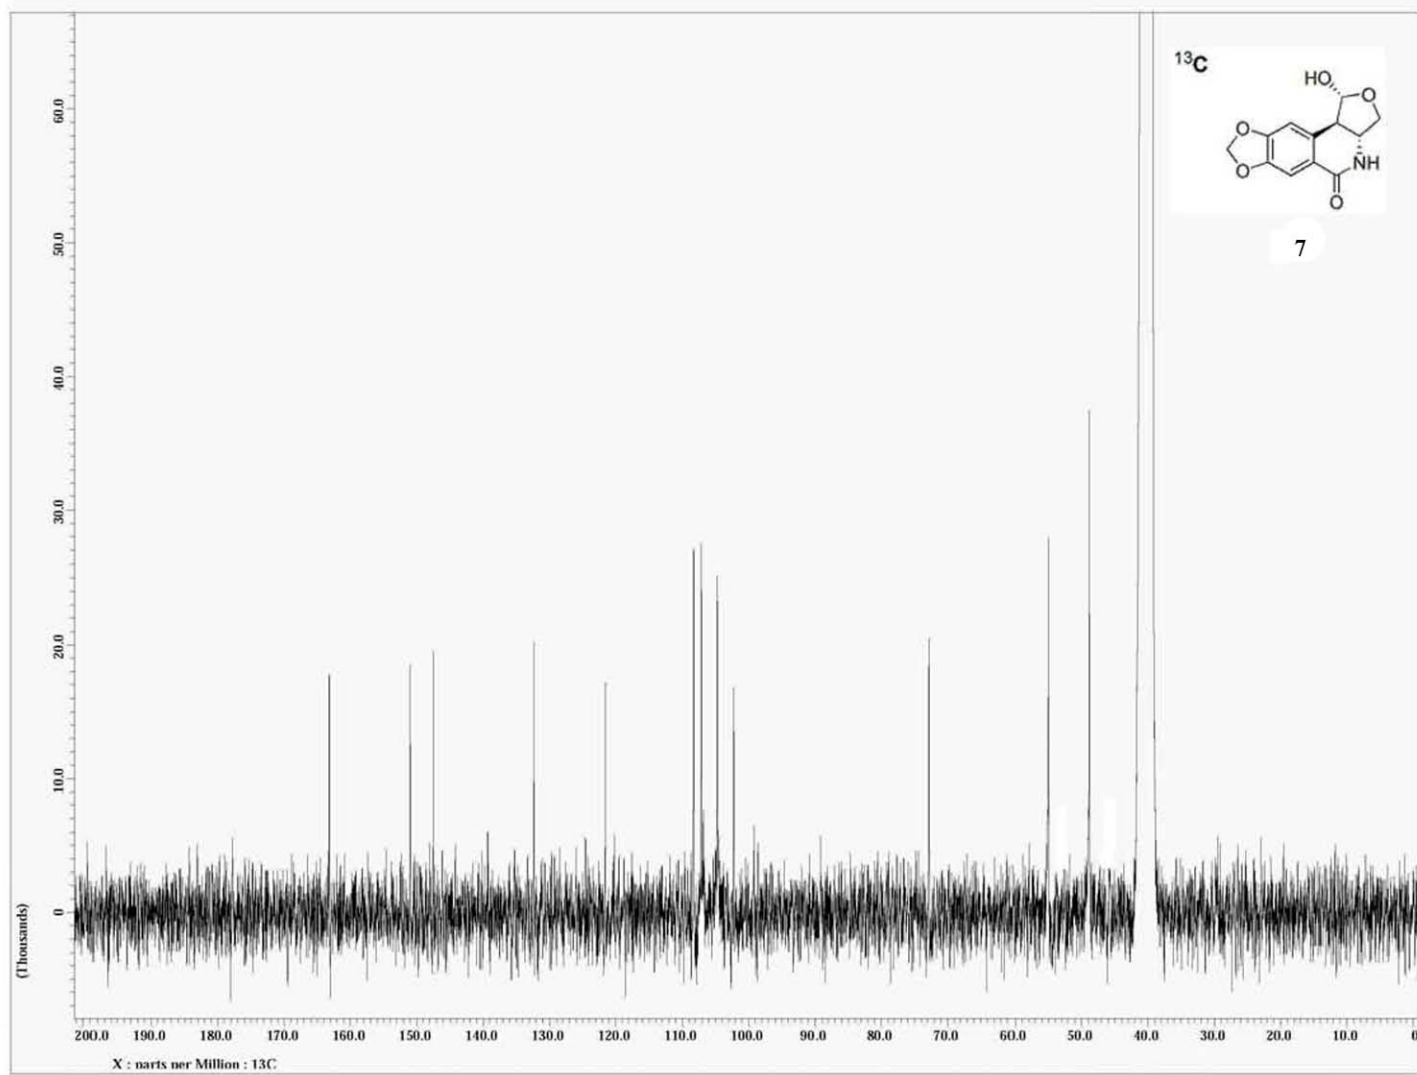

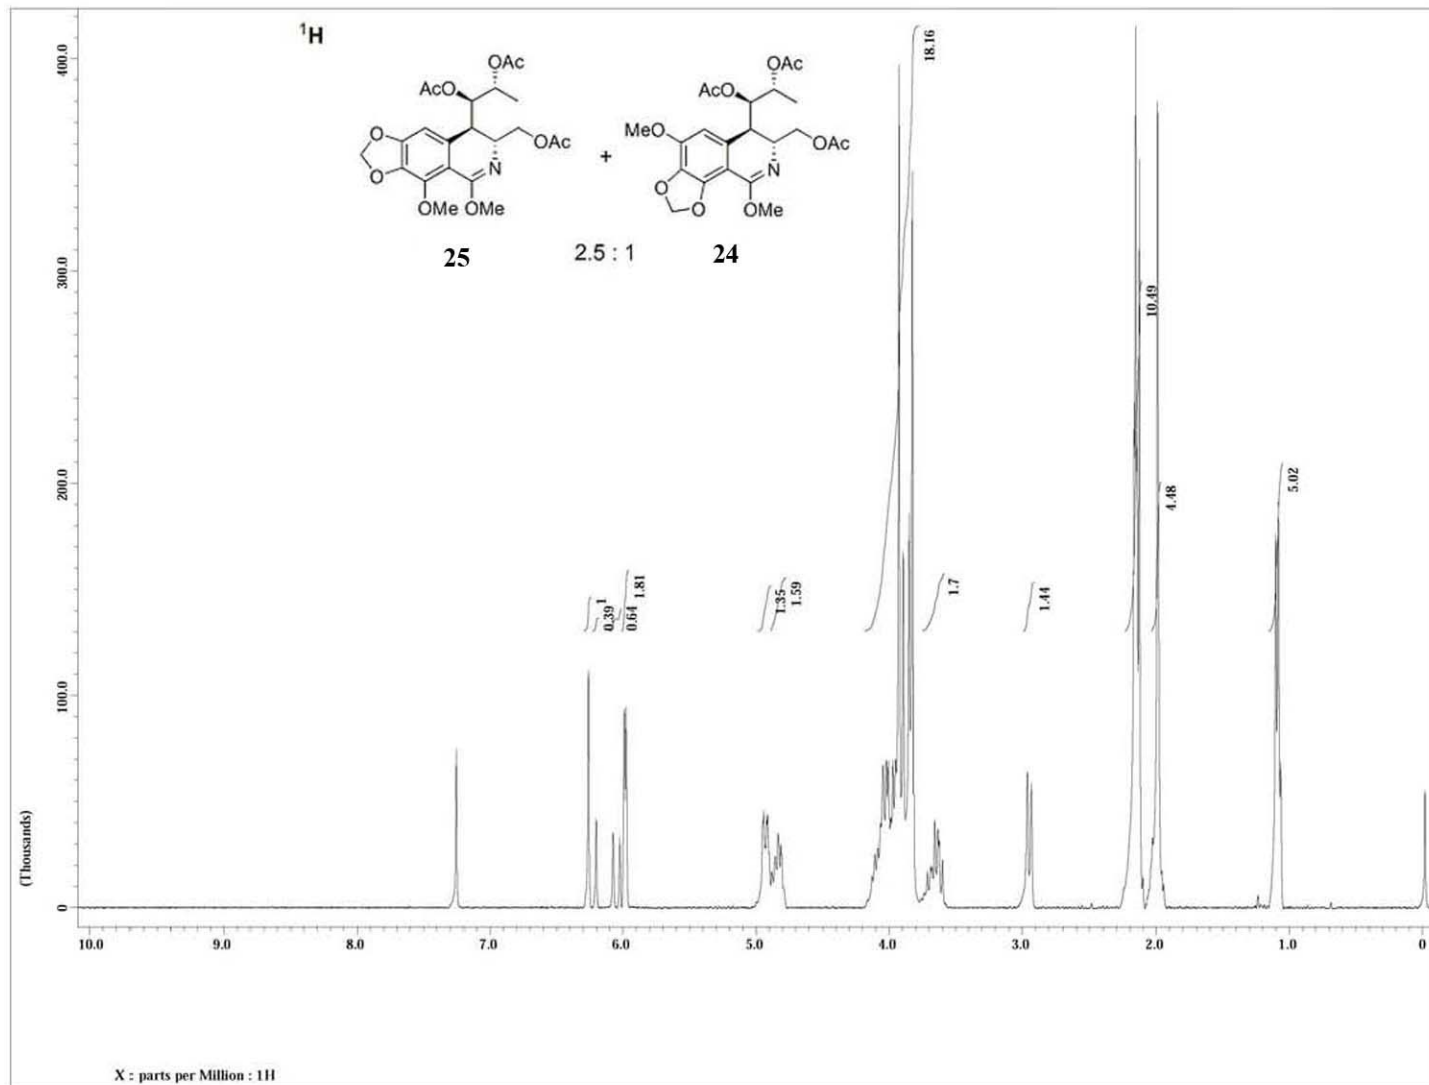

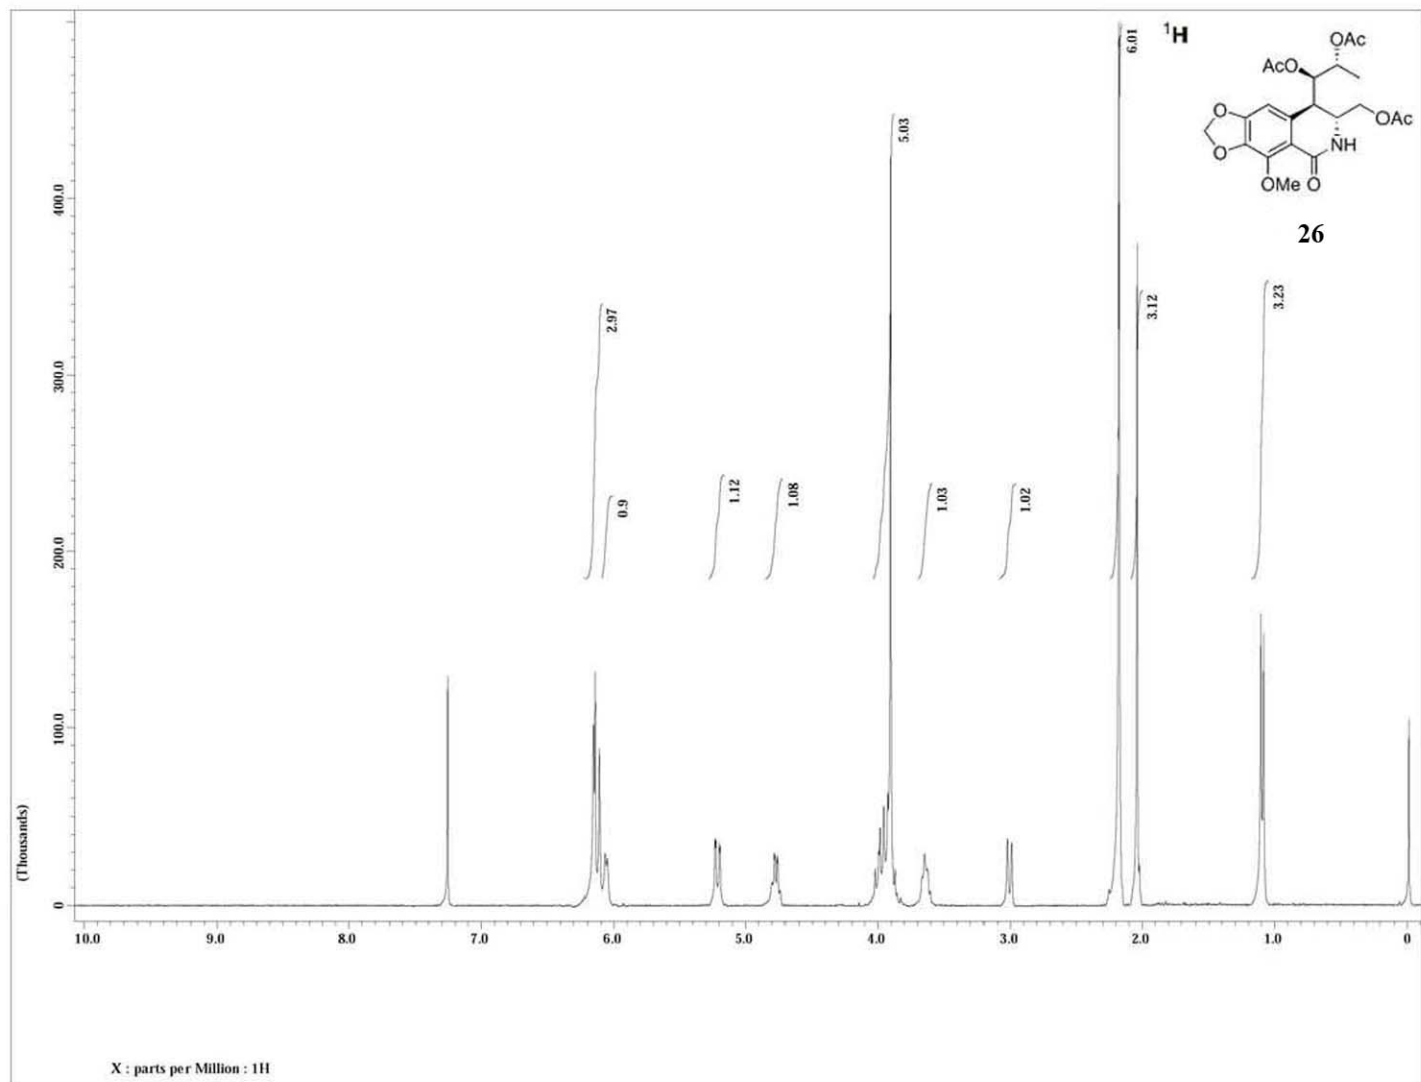

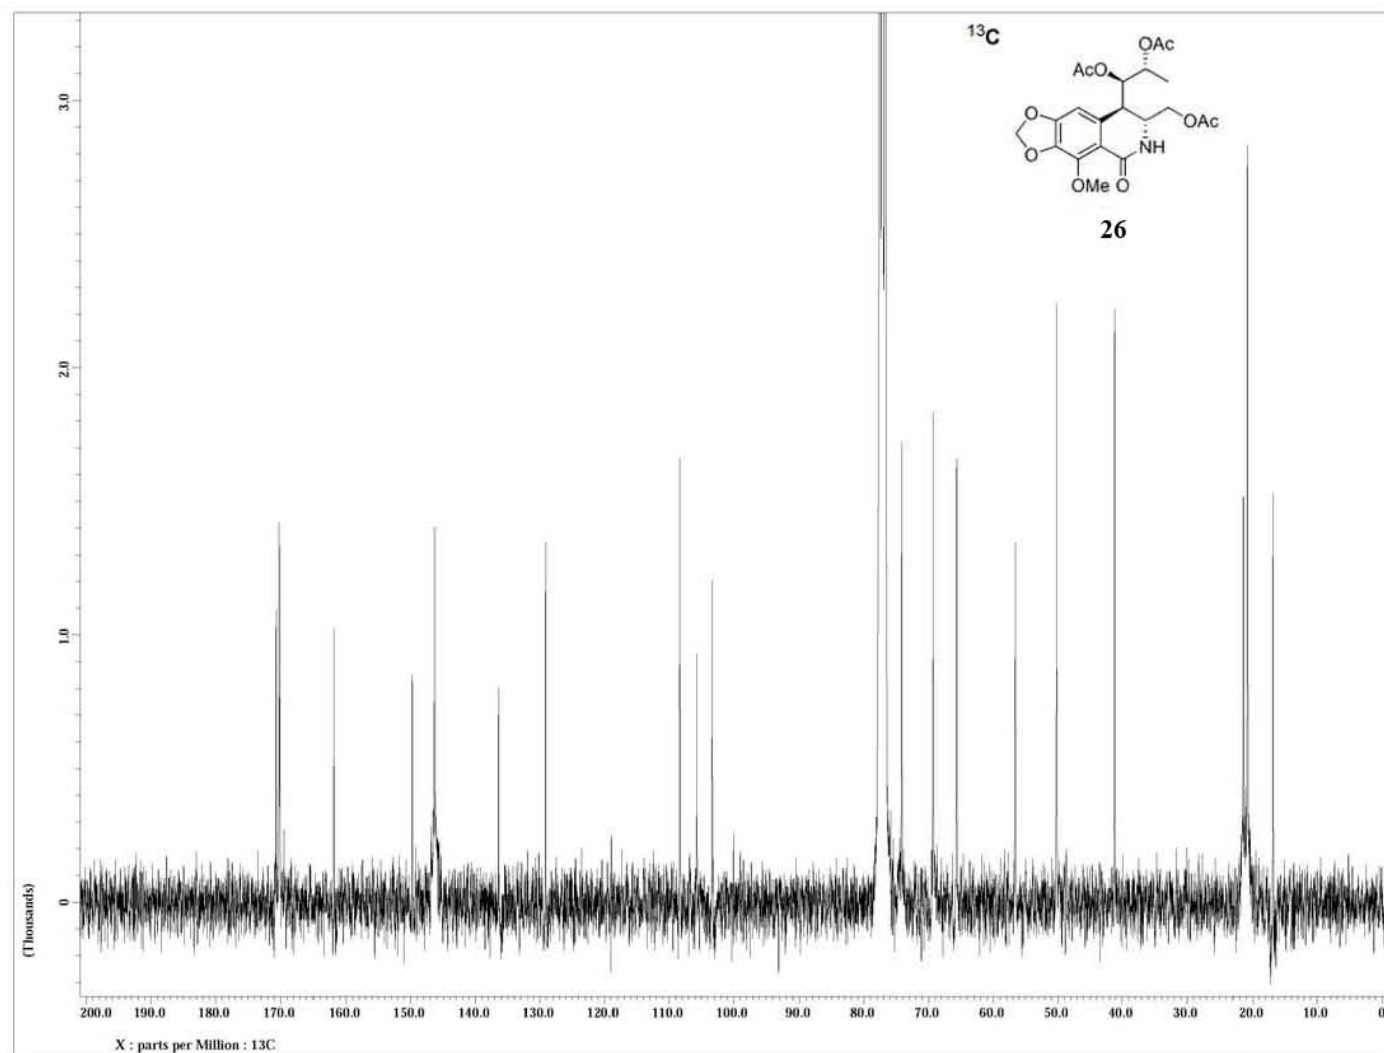

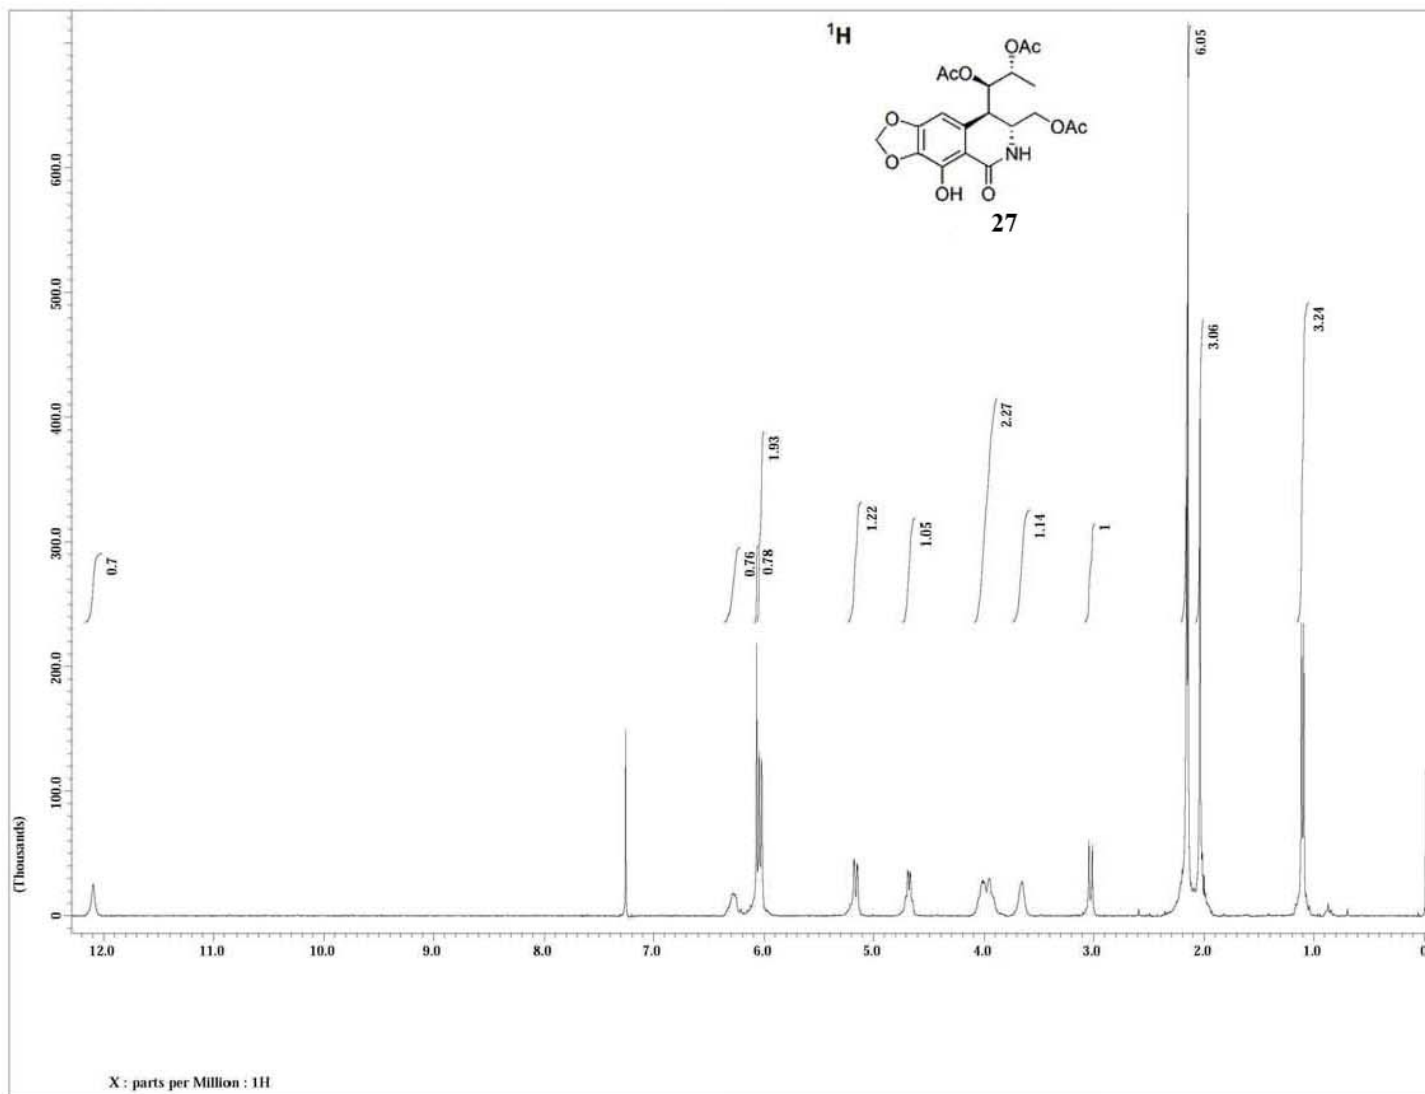



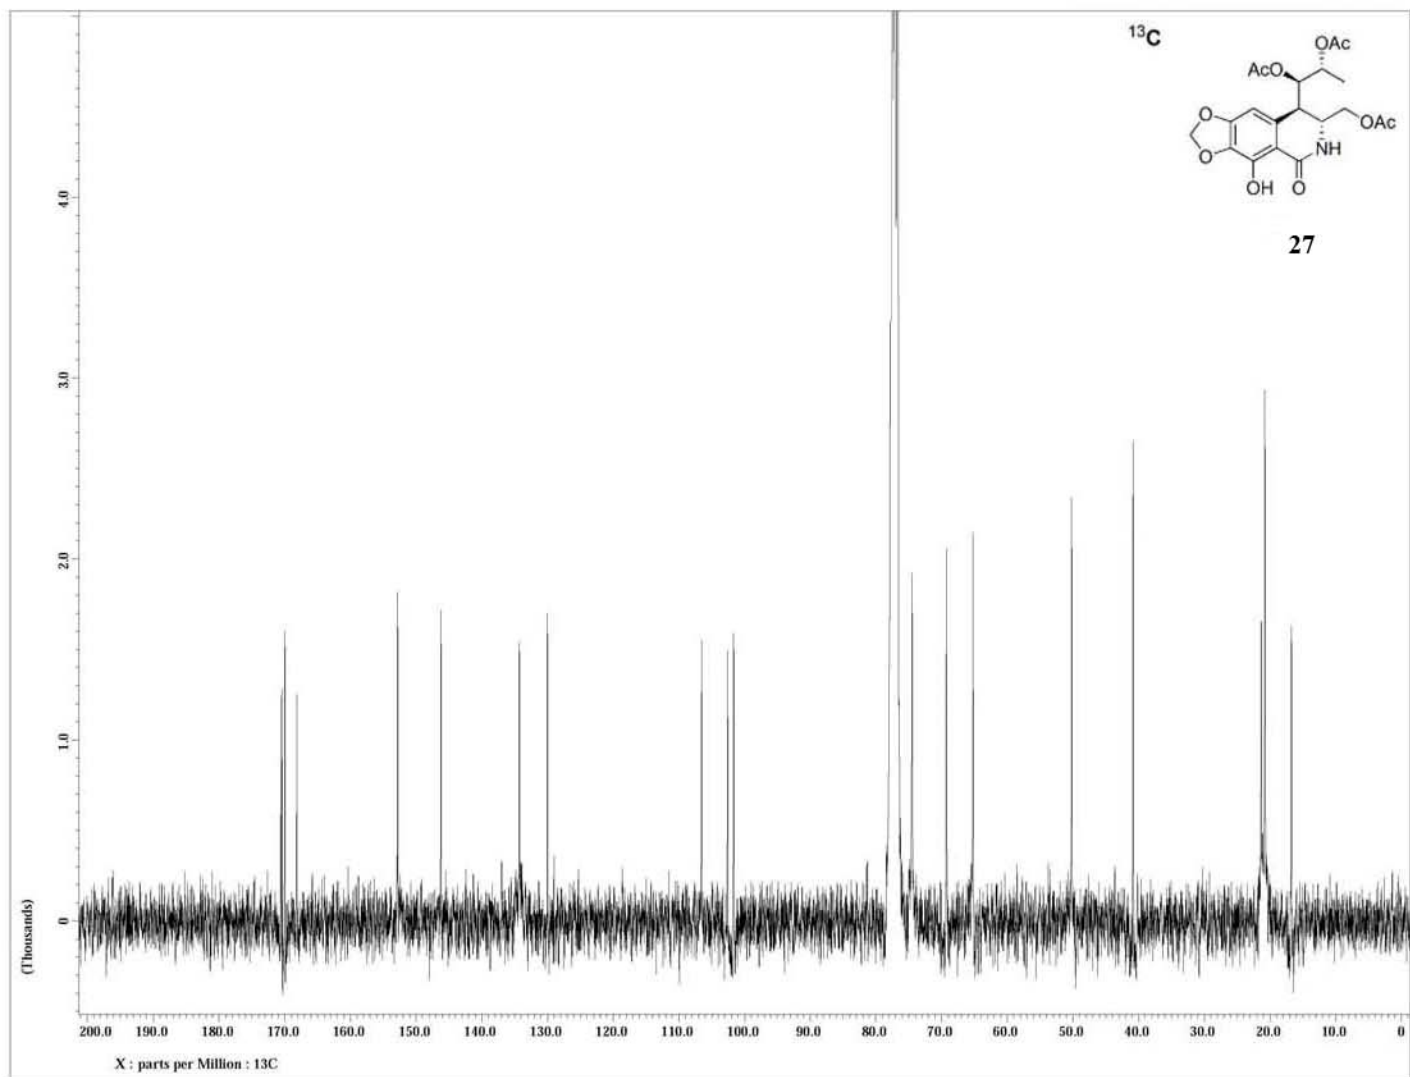

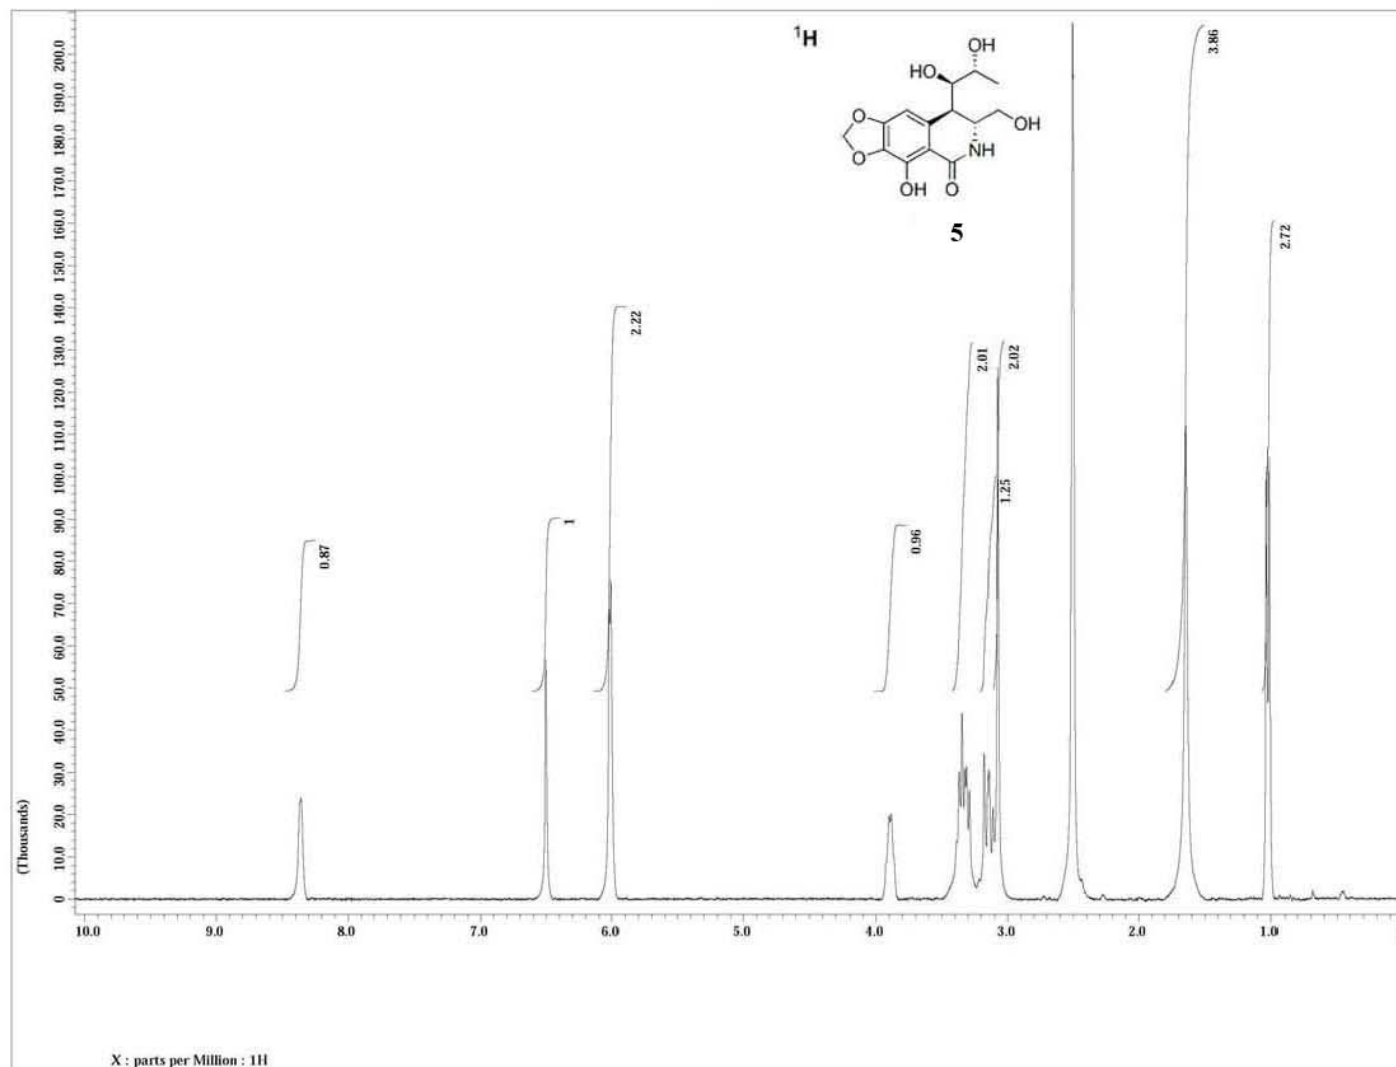

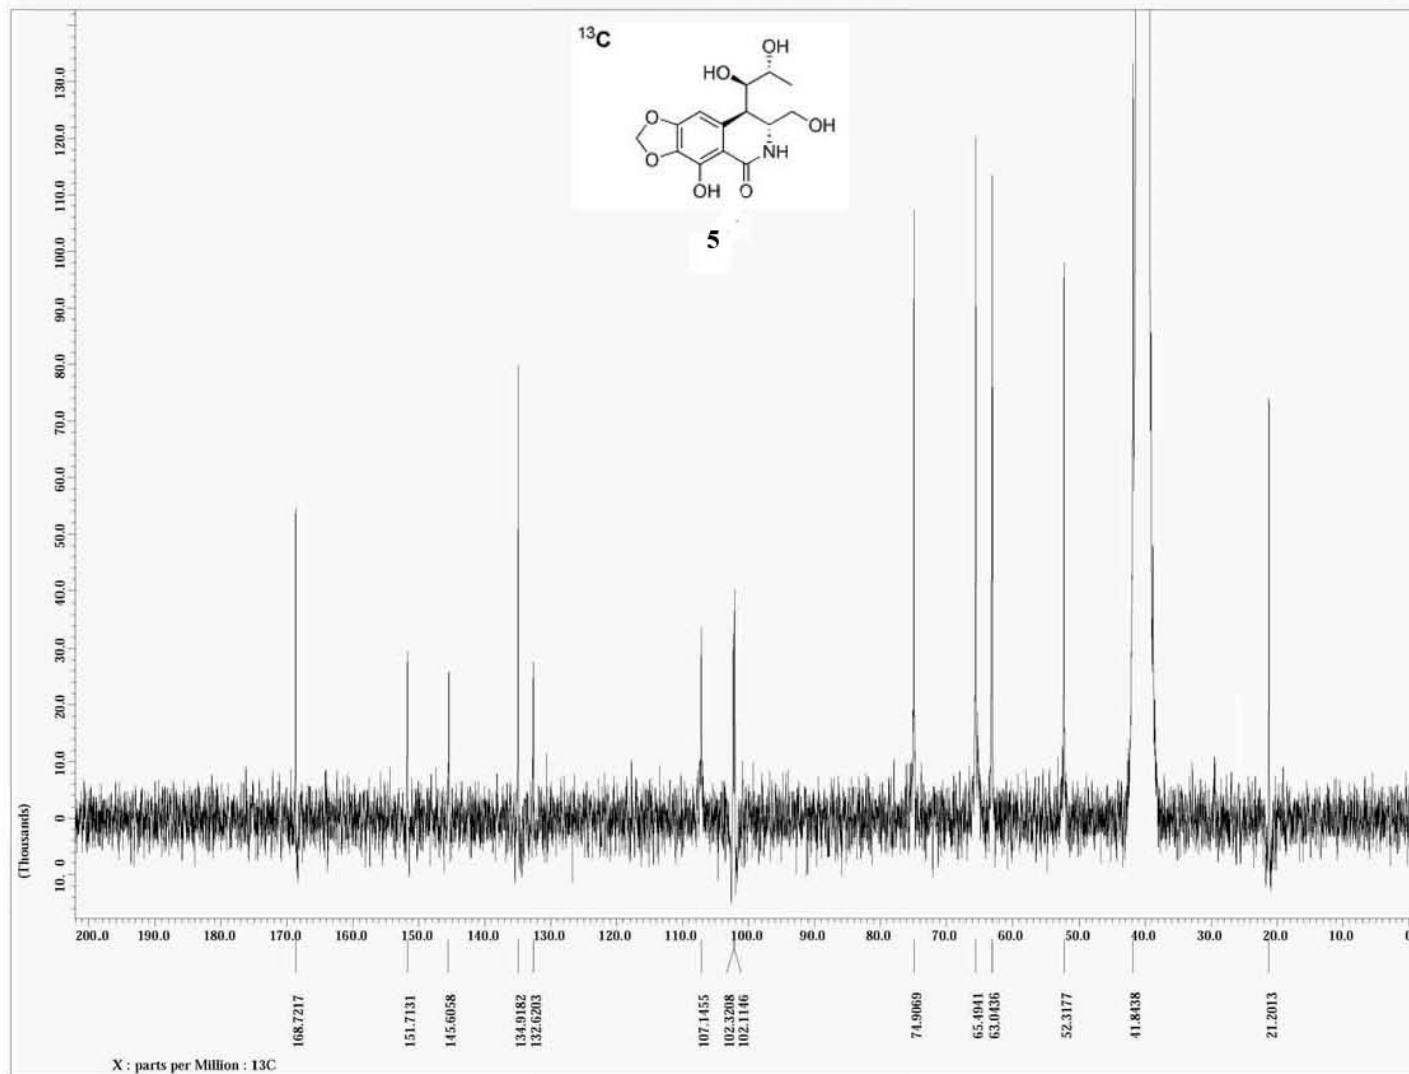

Supplement: NIHMS140079-supplement-1_si_001.pdf [file NIHMS140079-supplement-1_si_001.pdf]
